# Supplementary material for: Transcriptomic Analysis of Insulin-Secreting Murine Hepatocytes Transduced with an Integrating Adeno-Associated Viral Vector
Source: MDPI journal article supplement (doi:10.3390/ijtm3030026), 2023-09-06
Supplement: s1 [file s1]

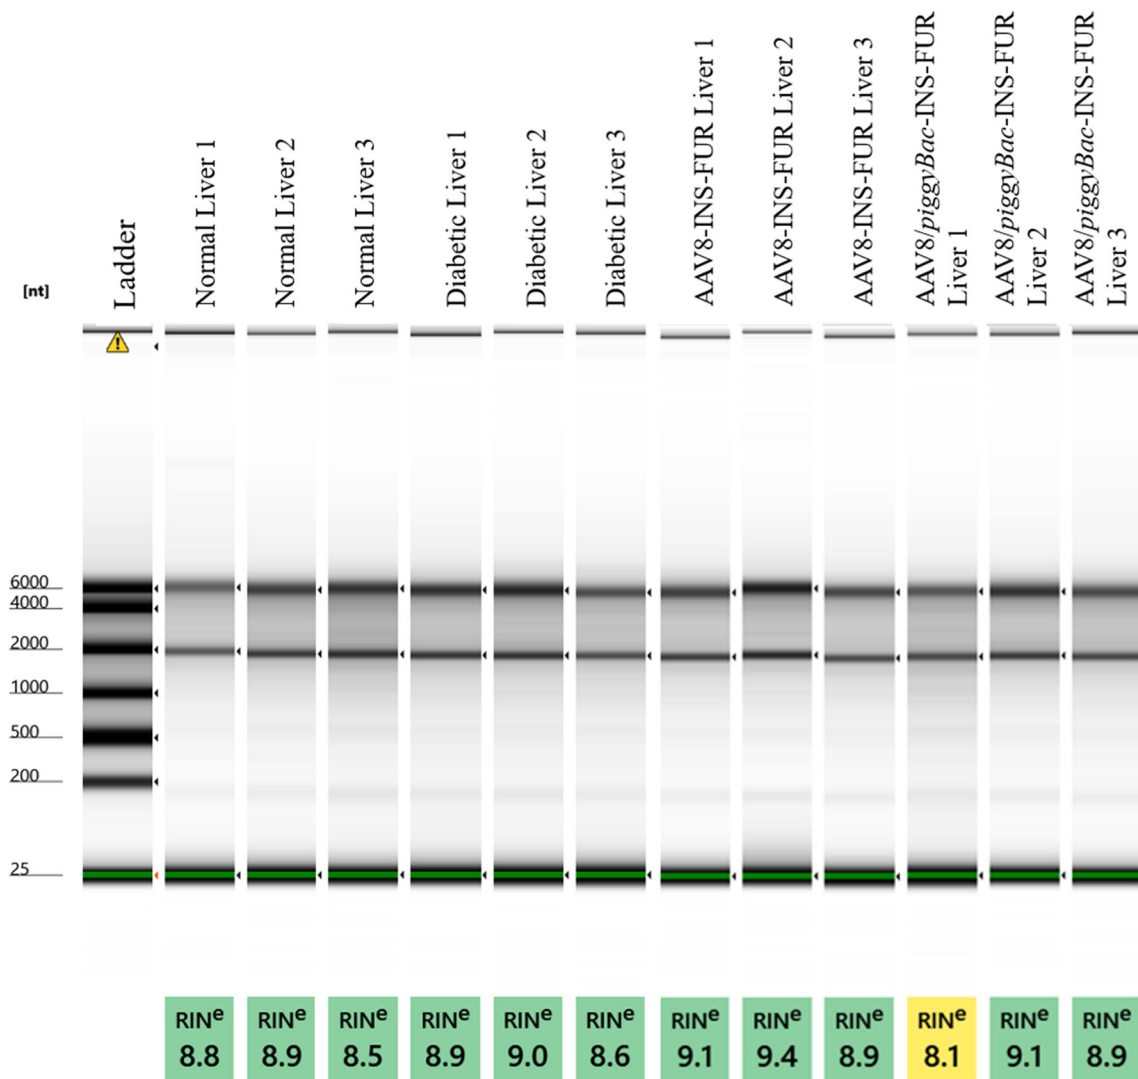

**Figure S2:** Quality analysis of RNA extractions using Agilent RNA ScreenTape System. The determined RNA integrity numbers are shown under the gel image.
