# Supplementary material for: Transcriptomic Analysis of Insulin-Secreting Murine Hepatocytes Transduced with an Integrating Adeno-Associated Viral Vector
Source: MDPI journal article supplement (doi:10.3390/ijtm3030026), 2023-09-06
Supplement: s1 [file s1]

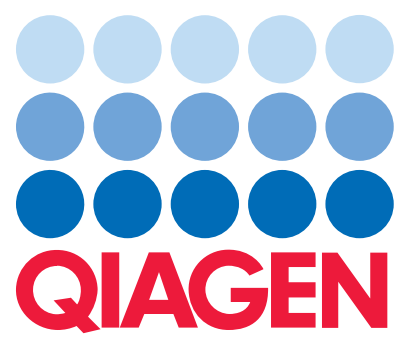

## Table of contents

|                                       |    |
|---------------------------------------|----|
| 1. Summary .....                      | 3  |
| 2. Per-sequence analysis .....        | 3  |
| 2.1 Lengths distribution .....        | 3  |
| 2.2 GC-content .....                  | 4  |
| 2.3 Ambiguous base-content .....      | 4  |
| 2.4 Quality distribution .....        | 5  |
| 3. Per-base analysis .....            | 5  |
| 3.1 Coverage .....                    | 6  |
| 3.2 Nucleotide contributions .....    | 6  |
| 3.3 GC-content .....                  | 7  |
| 3.4 Ambiguous base-content .....      | 7  |
| 3.5 Quality distribution .....        | 8  |
| 4. Over-representation analyses ..... | 8  |
| 4.1 Enriched 5-mers .....             | 9  |
| 4.2 Sequence duplication levels ..... | 9  |
| 4.3 Duplicated sequences .....        | 10 |

# 1. Summary

|                               |                               |
|-------------------------------|-------------------------------|
| Creation date:                | Fri Dec 23 11:58:52 AEDT 2022 |
| Generated by:                 | 14048742                      |
| Software:                     | CLC Genomics Workbench 22.0   |
| Based upon:                   | 1 data set                    |
| NL1_S1:                       | 71,177,957 sequences          |
| Total sequences in data set   | 71,177,957 sequences          |
| Total nucleotides in data set | 6,997,952,203 nucleotides     |

# 2. Per-sequence analysis

## 2.1 Lengths distribution

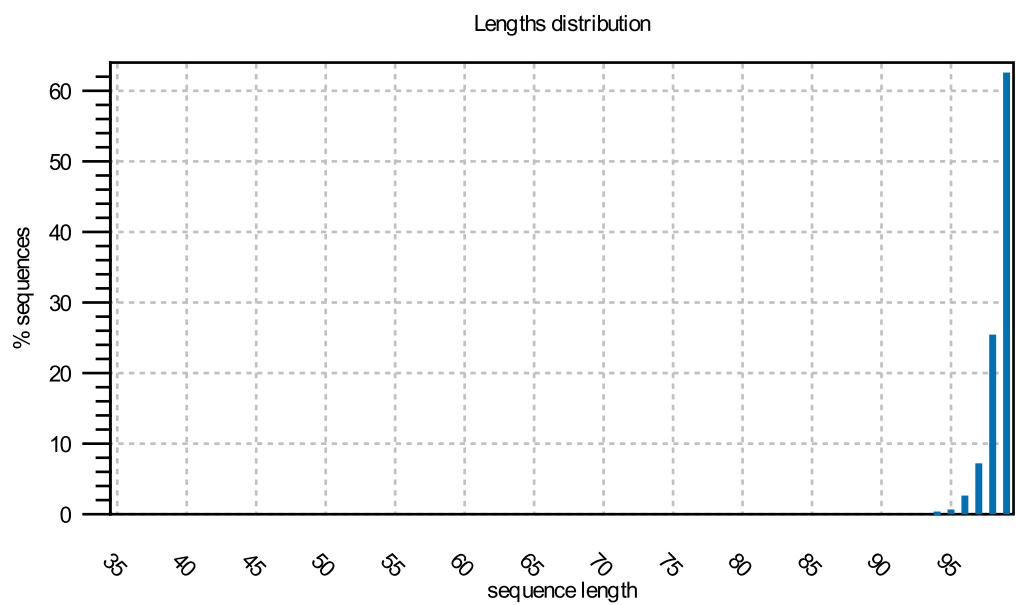

Distribution of sequence lengths. In cases of untrimmed Illumina reads it will just contain a single peak.  
x: sequence length in base-pairs  
y: number of sequences featuring a particular length normalized to the total number of sequences

## 2.2 GC-content

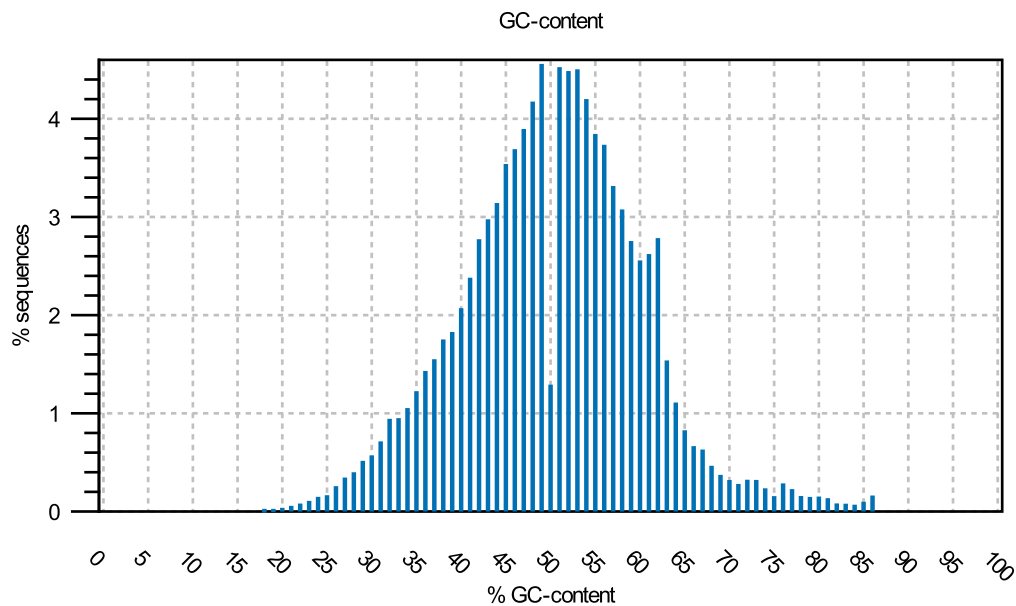

Distribution of GC-contents. The GC-content of a sequence is calculated as the number of GC-bases compared to all bases (including ambiguous bases).

x: relative GC-content of a sequence in percent

y: number of sequences featuring particular GC-percentages normalized to the total number of sequences

## 2.3 Ambiguous base-content

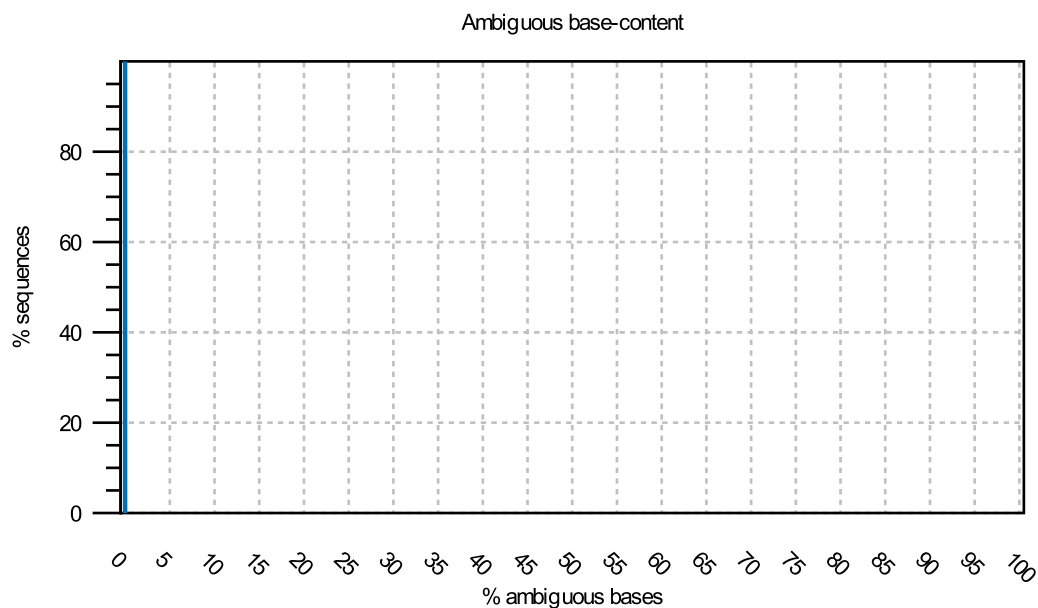

Distribution of N-contents. The N-content of a sequence is calculated as the number of ambiguous bases compared to all bases.

x: relative N-content of a sequence in percent

y: number of sequences featuring particular N-percentages normalized to the total number of sequences

## 2.4 Quality distribution

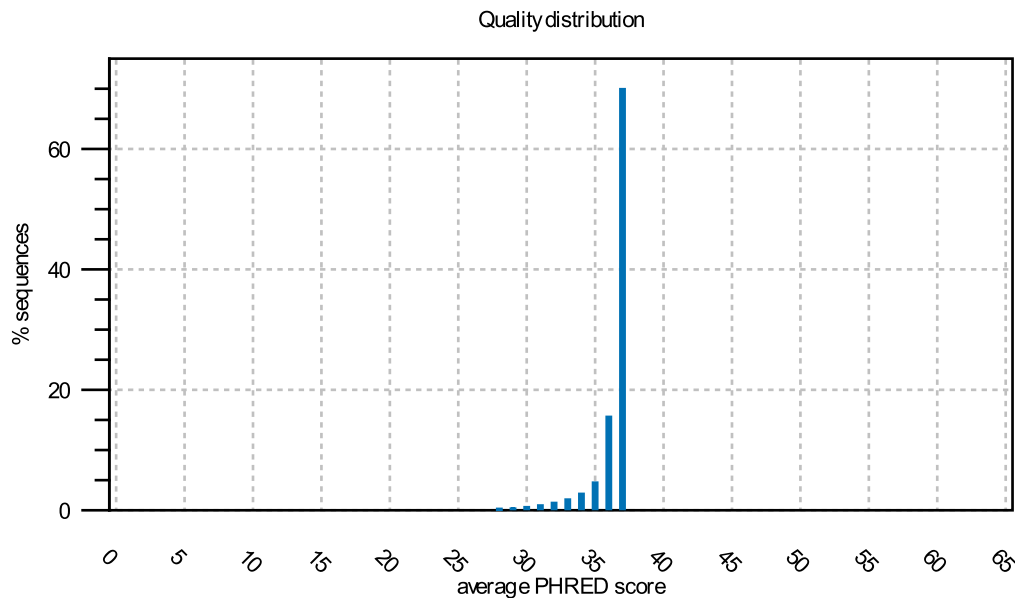

Distribution of average sequence quality scores. The quality of a sequence is calculated as the arithmetic mean of its base qualities.

x: PHRED-score

y: number of sequences observed at that qual. score normalized to the total number of sequences

## 3. Per-base analysis

## 3.1 Coverage

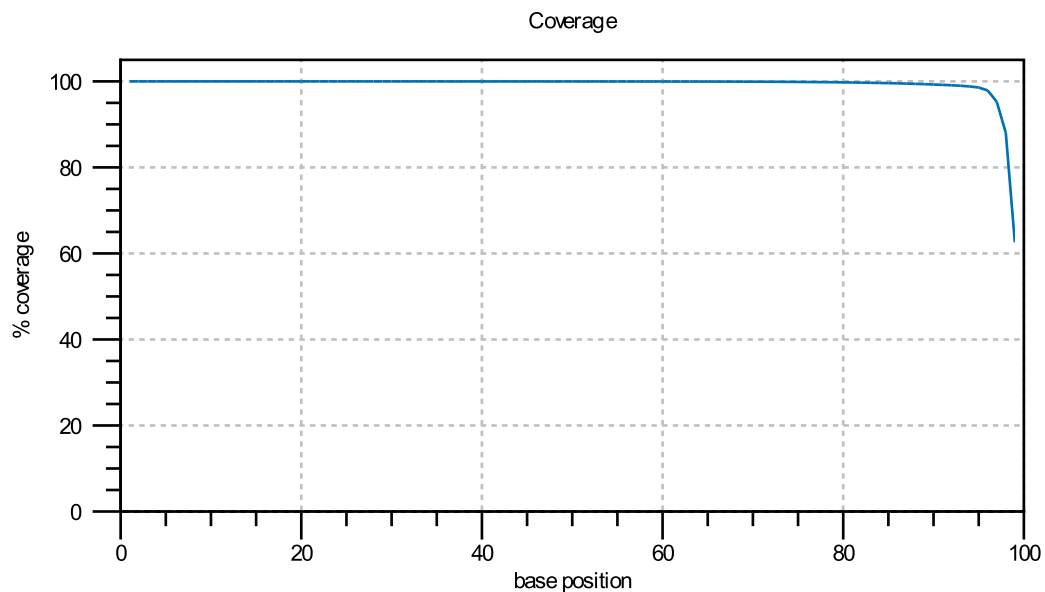

The number of sequences that support (cover) the individual base positions. In cases of untrimmed Illumina reads it will just contain a line.

x: base position

y: number of sequences covering individual base positions normalized to the total number of sequences

## 3.2 Nucleotide contributions

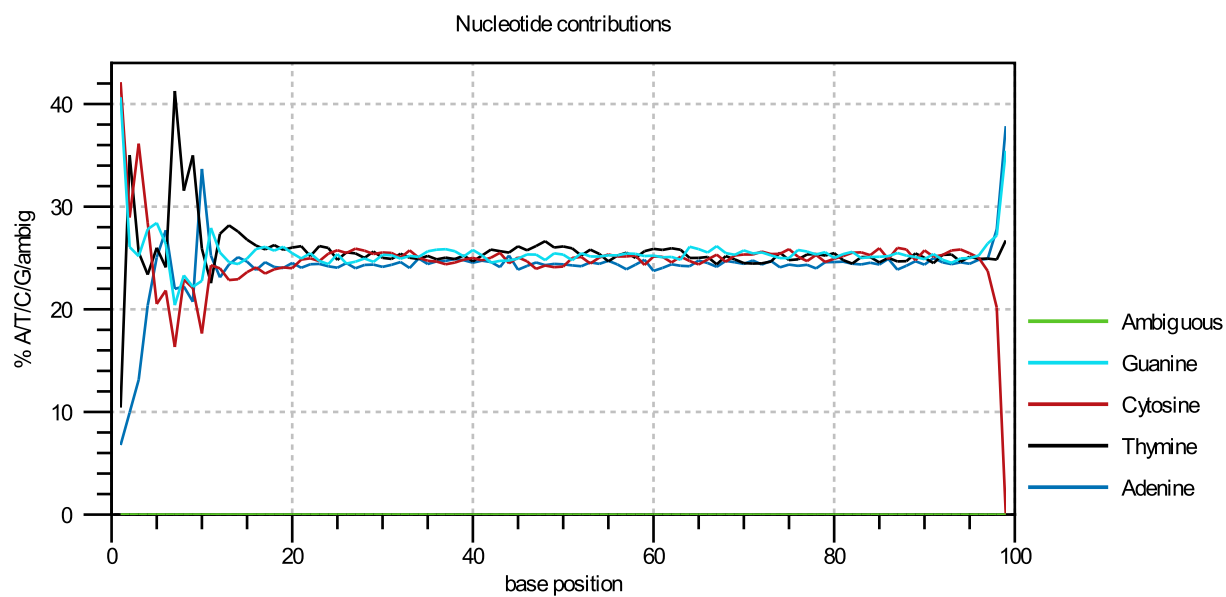

Coverages for the four DNA nucleotides and ambiguous bases.

x: base position

y: number of nucleotides observed per type normalized to the total number of nucleotides observed at that position

### 3.3 GC-content

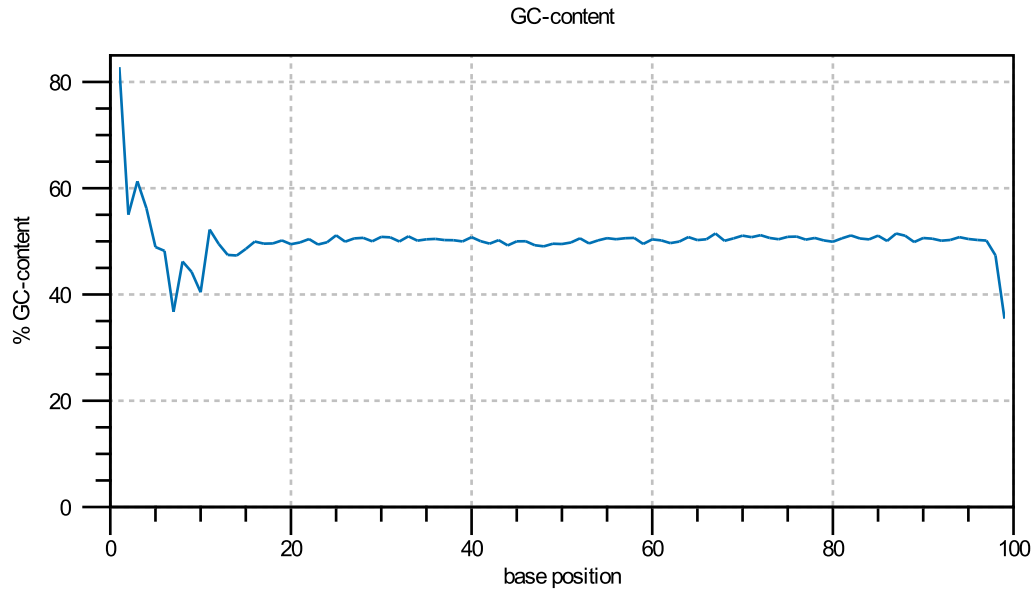

Combined coverage of G- and C-bases.

x: base position

y: number of G- and C-bases observed at current position normalized to the total number of bases observed at that position

### 3.4 Ambiguous base-content

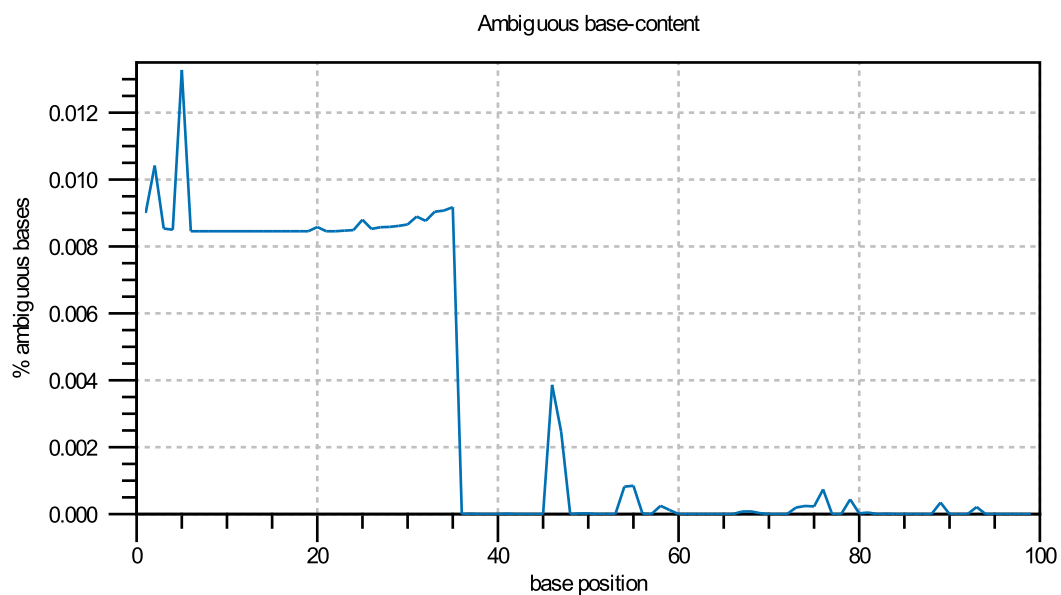

Combined coverage of ambiguous bases.

x: base position

y: number of ambiguous bases observed at current position normalized to the total number of bases observed at that position

### 3.5 Quality distribution

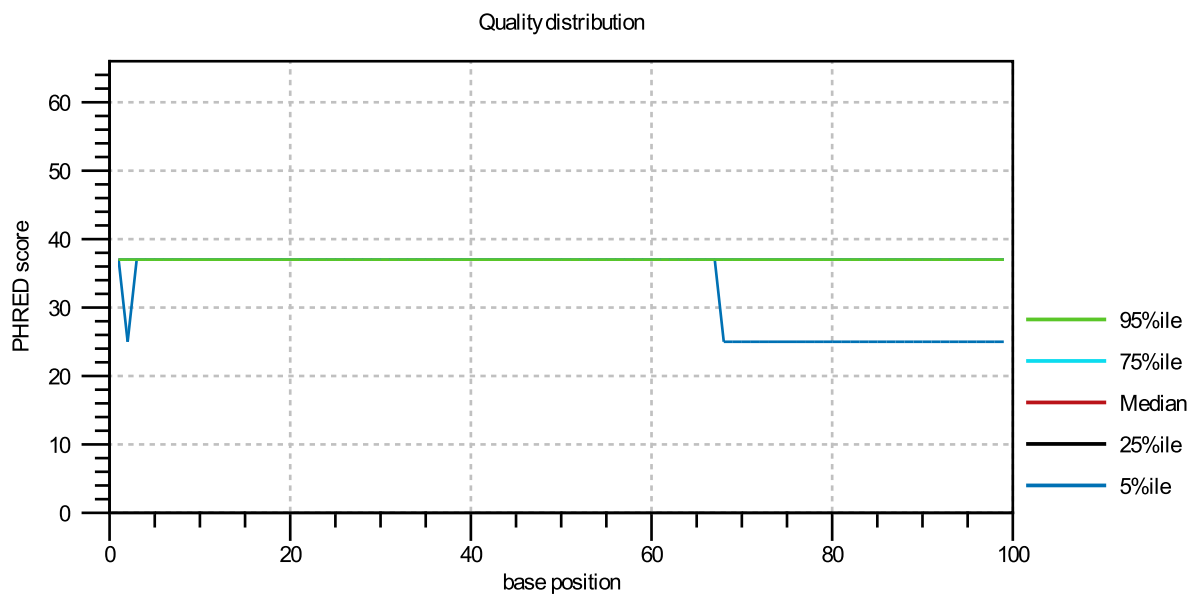

Base-quality distribution along the base positions.

x: base position

y: median & percentiles of quality scores observed at that base position

## 4. Over-representation analyses



## 4.1 Enriched 5-mers

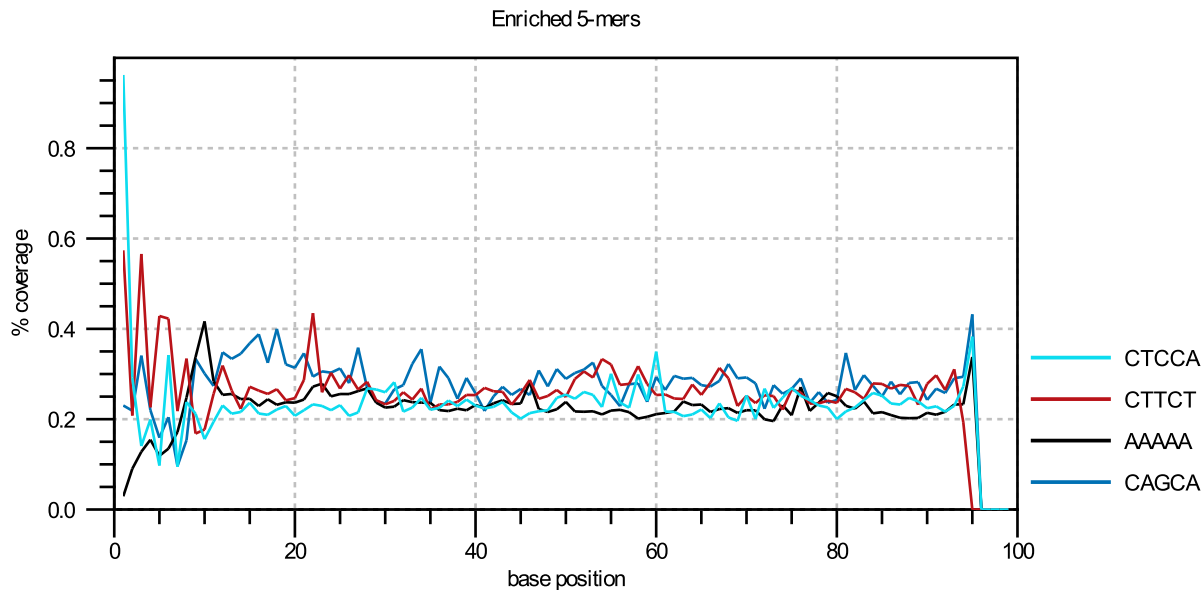

The five most-overrepresented 5-mers. The over-representation of a 5-mer is calculated as the ratio of the observed and expected 5-mer frequency. The expected frequency is calculated as product of the empirical nucleotide probabilities that make up the 5-mer. (5-mers that contain ambiguous bases are ignored)

x: base position

y: number of times a 5-mer has been observed normalized to all 5-mers observed at that position

## 4.2 Sequence duplication levels

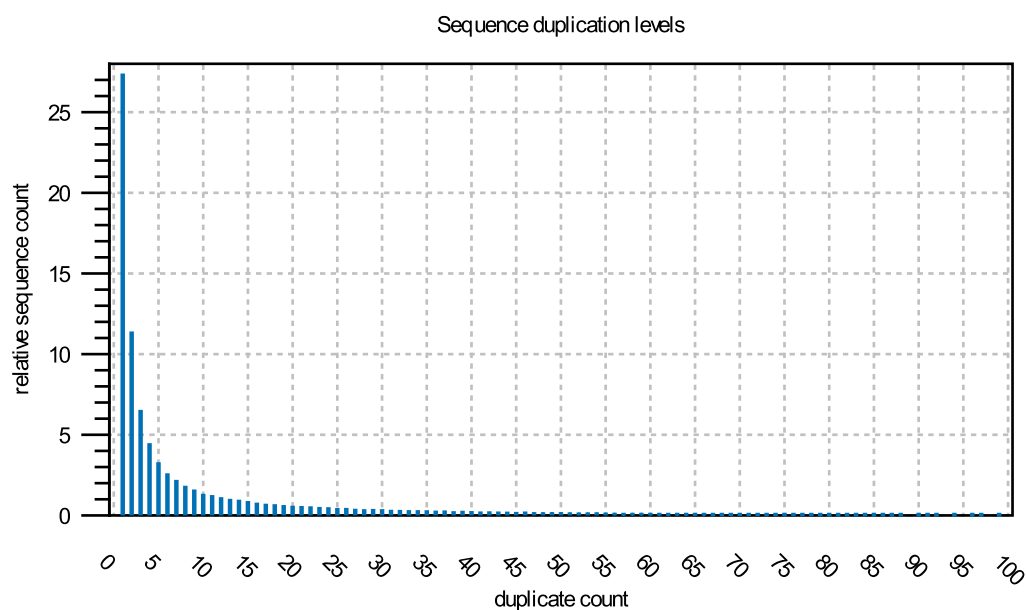

Duplication level distribution. Duplication levels are simply the count of how often a particular sequence has been found.

x: duplicate count

y: number of sequences that have been found that many times normalized to the number of unique sequences

## **4.3 Duplicated sequences**

A table of over-represented sequences is given in the supplementary report

# 1. Summary

|                               |                               |
|-------------------------------|-------------------------------|
| Creation date:                | Fri Dec 23 13:47:25 AEDT 2022 |
| Generated by:                 | 14048742                      |
| Software:                     | CLC Genomics Workbench 22.0   |
| Based upon:                   | 1 data set                    |
| NL2_S11:                      | 78,295,601 sequences          |
| Total sequences in data set   | 78,295,601 sequences          |
| Total nucleotides in data set | 7,697,408,258 nucleotides     |

# 2. Per-sequence analysis

## 2.1 Lengths distribution

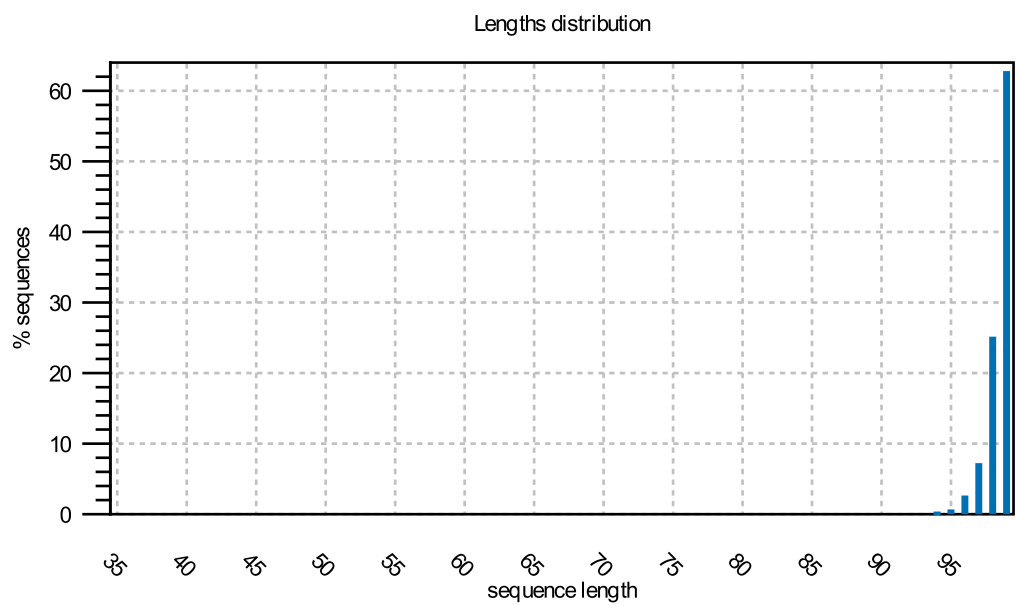

Distribution of sequence lengths. In cases of untrimmed Illumina reads it will just contain a single peak.  
x: sequence length in base-pairs  
y: number of sequences featuring a particular length normalized to the total number of sequences

## 2.2 GC-content

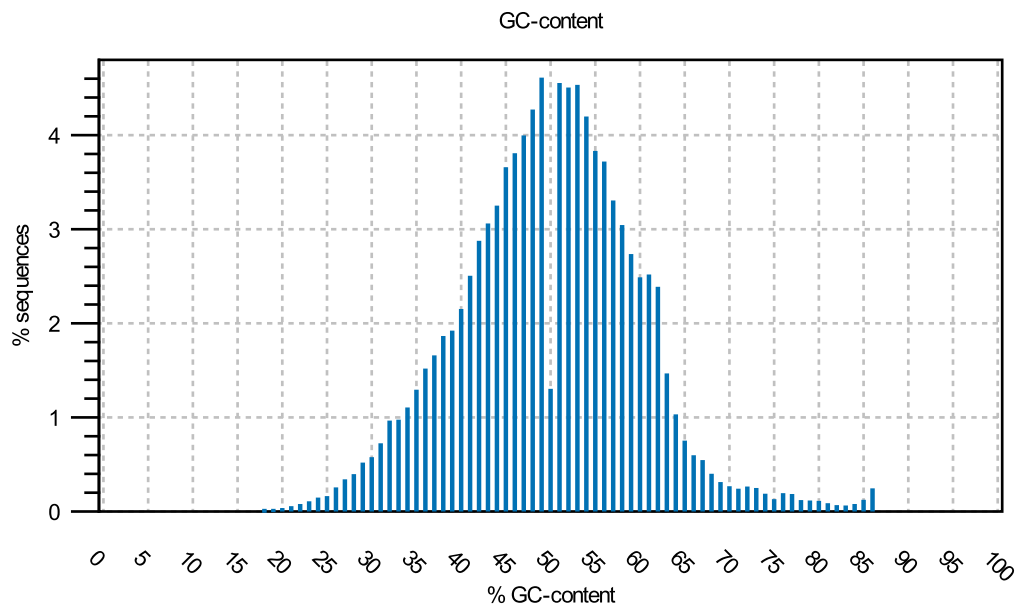

Distribution of GC-contents. The GC-content of a sequence is calculated as the number of GC-bases compared to all bases (including ambiguous bases).

x: relative GC-content of a sequence in percent

y: number of sequences featuring particular GC-percentages normalized to the total number of sequences

## 2.3 Ambiguous base-content

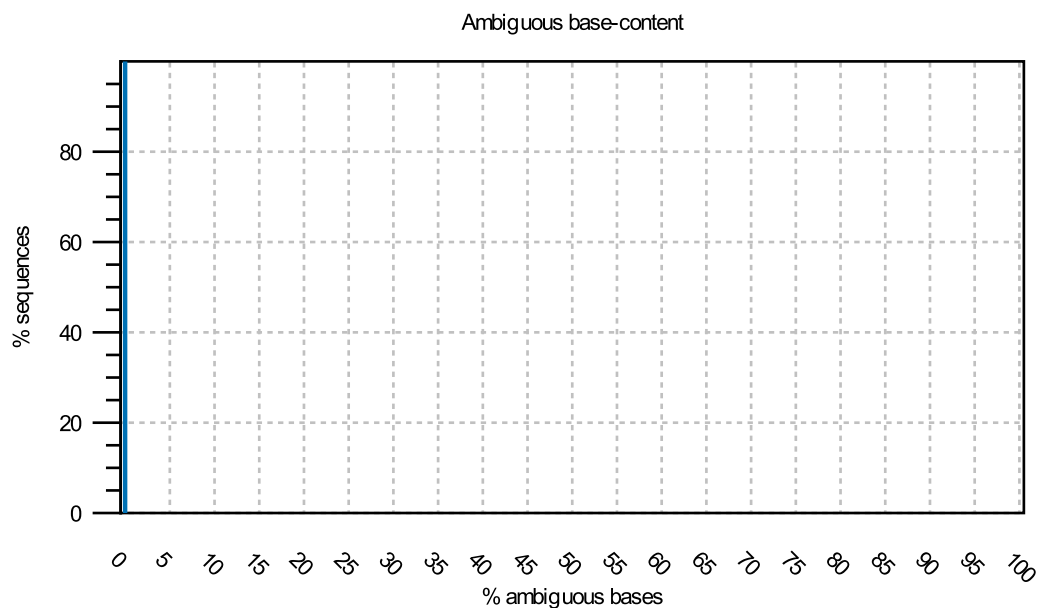

Distribution of N-contents. The N-content of a sequence is calculated as the number of ambiguous bases compared to all bases.

x: relative N-content of a sequence in percent

y: number of sequences featuring particular N-percentages normalized to the total number of sequences

## 2.4 Quality distribution

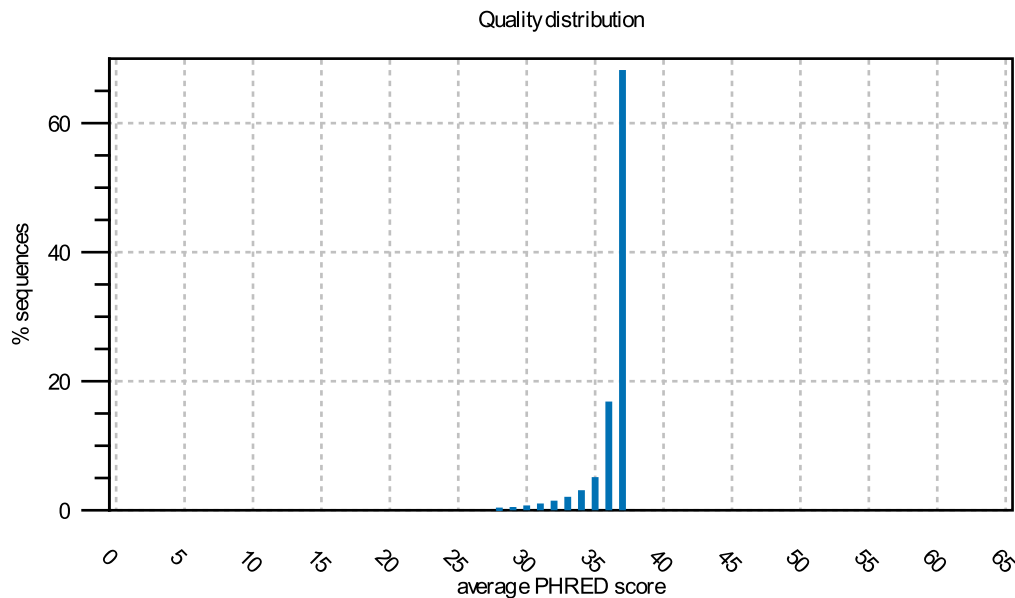

Distribution of average sequence quality scores. The quality of a sequence is calculated as the arithmetic mean of its base qualities.

x: PHRED-score

y: number of sequences observed at that qual. score normalized to the total number of sequences

## 3. Per-base analysis

## 3.1 Coverage

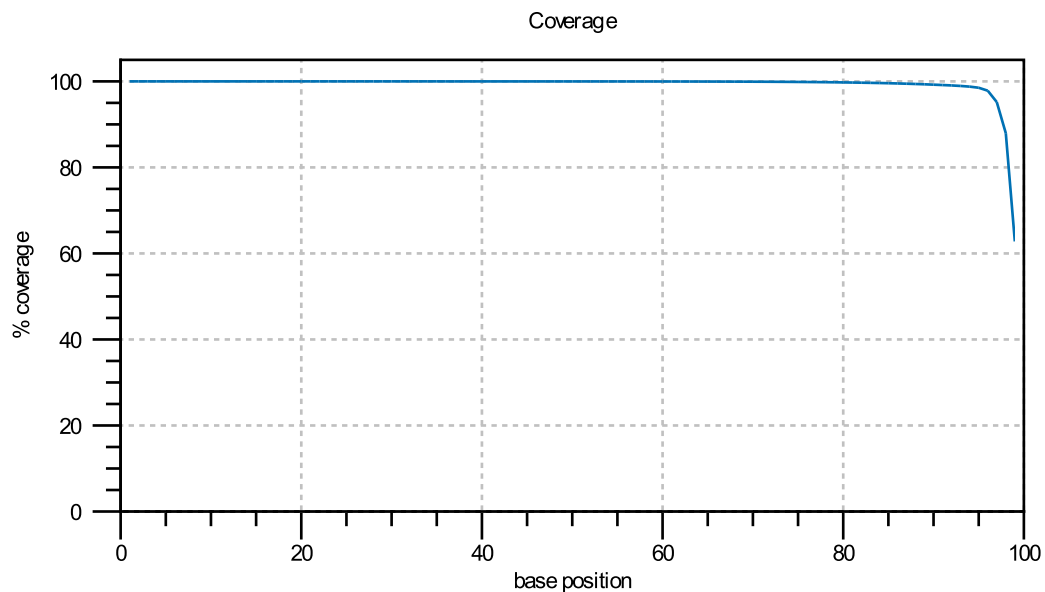

The number of sequences that support (cover) the individual base positions. In cases of untrimmed Illumina reads it will just contain a line.

x: base position

y: number of sequences covering individual base positions normalized to the total number of sequences

## 3.2 Nucleotide contributions

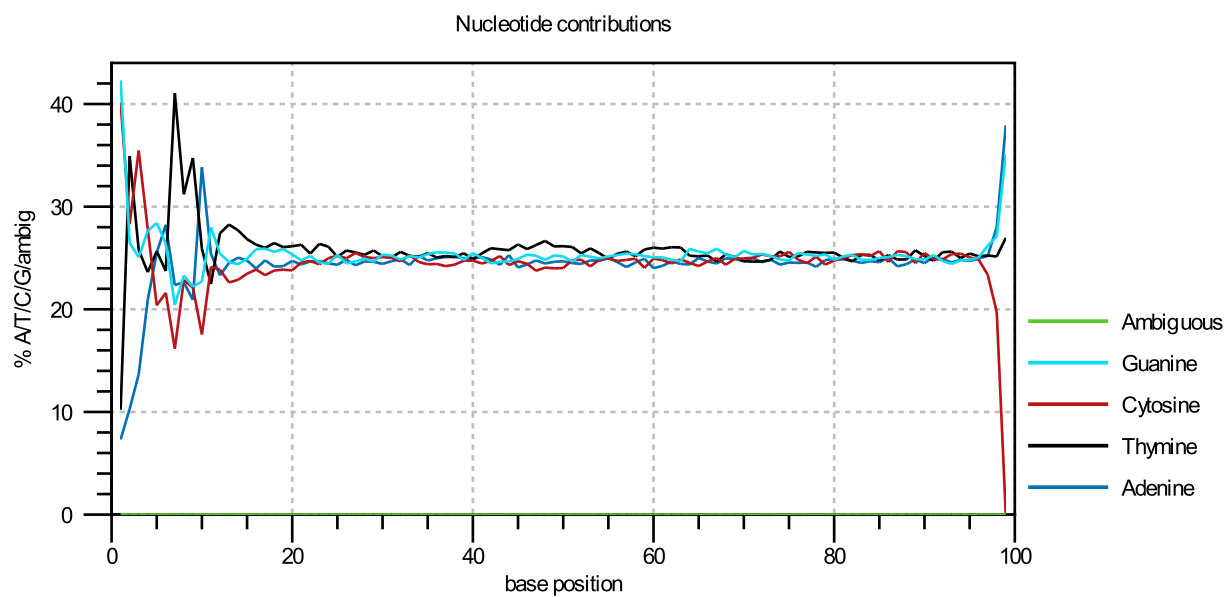

Coverages for the four DNA nucleotides and ambiguous bases.

x: base position

y: number of nucleotides observed per type normalized to the total number of nucleotides observed at that position

### 3.3 GC-content

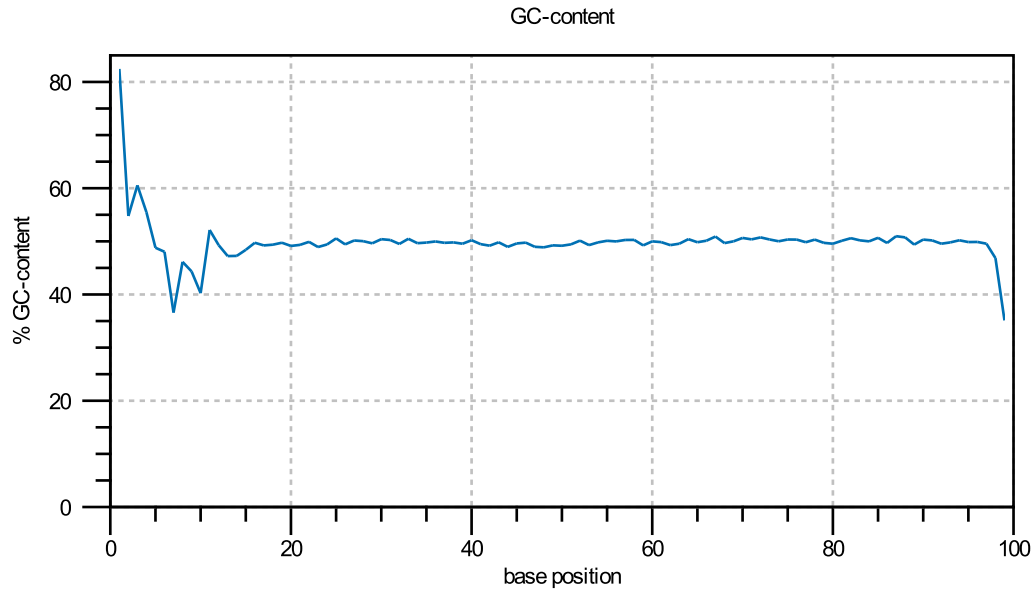

Combined coverage of G- and C-bases.

x: base position

y: number of G- and C-bases observed at current position normalized to the total number of bases observed at that position

### 3.4 Ambiguous base-content

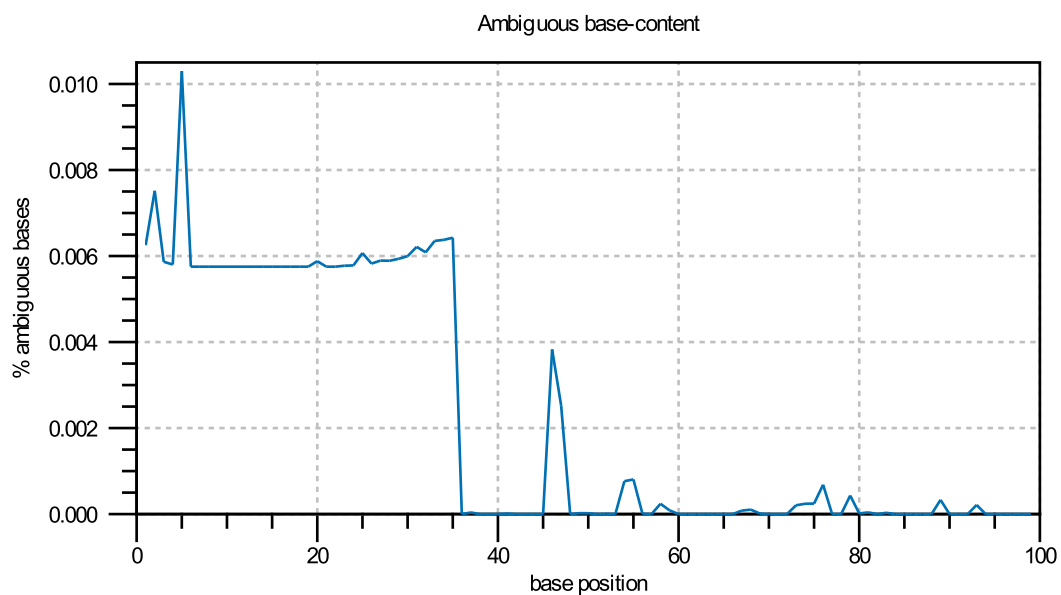

Combined coverage of ambiguous bases.

x: base position

y: number of ambiguous bases observed at current position normalized to the total number of bases observed at that position

### 3.5 Quality distribution

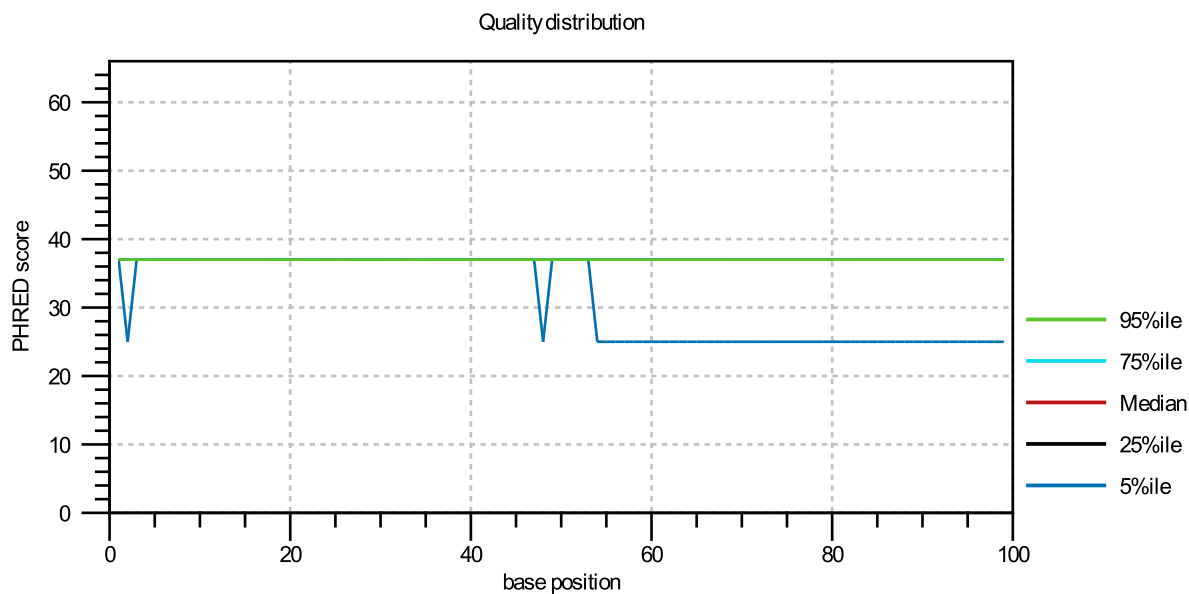

Base-quality distribution along the base positions.

x: base position

y: median & percentiles of quality scores observed at that base position

## 4. Over-representation analyses



## 4.1 Enriched 5-mers

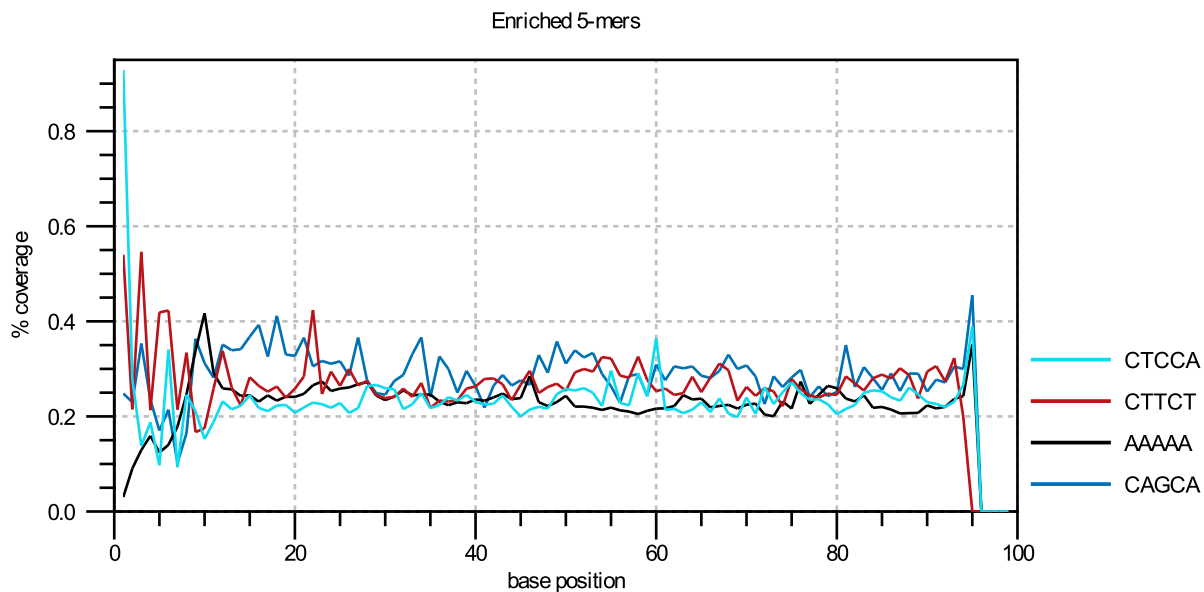

The five most-overrepresented 5-mers. The over-representation of a 5-mer is calculated as the ratio of the observed and expected 5-mer frequency. The expected frequency is calculated as product of the empirical nucleotide probabilities that make up the 5-mer. (5-mers that contain ambiguous bases are ignored)

x: base position

y: number of times a 5-mer has been observed normalized to all 5-mers observed at that position

## 4.2 Sequence duplication levels

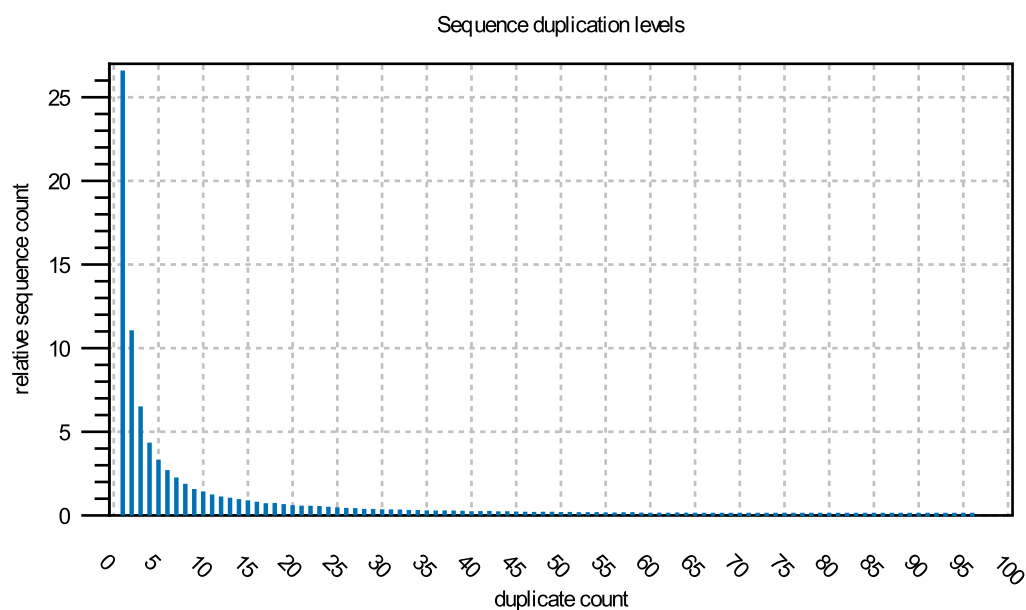

Duplication level distribution. Duplication levels are simply the count of how often a particular sequence has been found.

x: duplicate count

y: number of sequences that have been found that many times normalized to the number of unique sequences

## **4.3 Duplicated sequences**

A table of over-represented sequences is given in the supplementary report

# 1. Summary

|                               |                               |
|-------------------------------|-------------------------------|
| Creation date:                | Fri Dec 23 14:08:20 AEDT 2022 |
| Generated by:                 | 14048742                      |
| Software:                     | CLC Genomics Workbench 22.0   |
| Based upon:                   | 1 data set                    |
| NL3_S4:                       | 75,867,324 sequences          |
| Total sequences in data set   | 75,867,324 sequences          |
| Total nucleotides in data set | 7,459,702,237 nucleotides     |

# 2. Per-sequence analysis

## 2.1 Lengths distribution

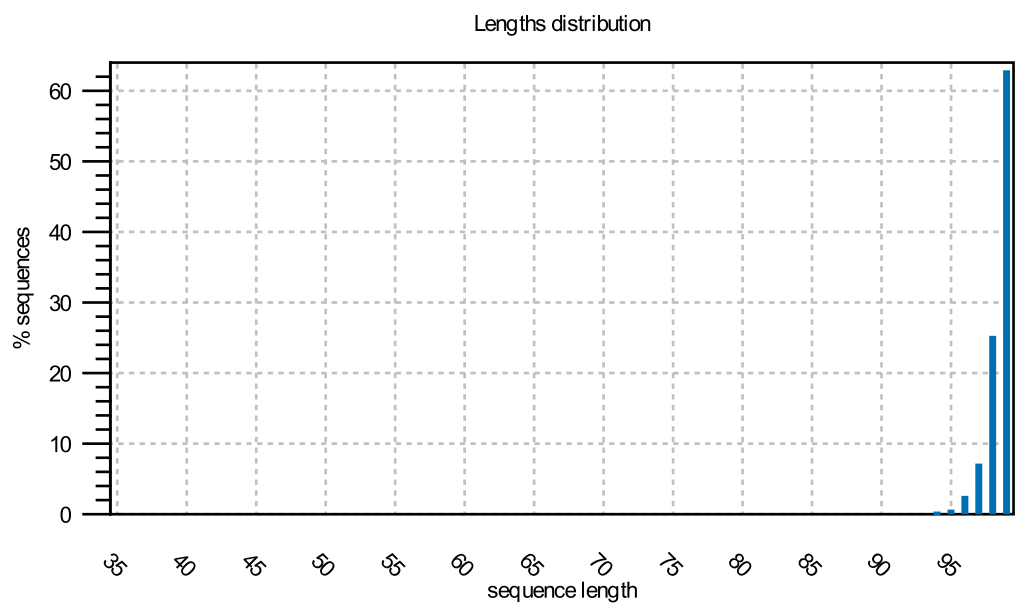

Distribution of sequence lengths. In cases of untrimmed Illumina reads it will just contain a single peak.  
x: sequence length in base-pairs  
y: number of sequences featuring a particular length normalized to the total number of sequences

## 2.2 GC-content

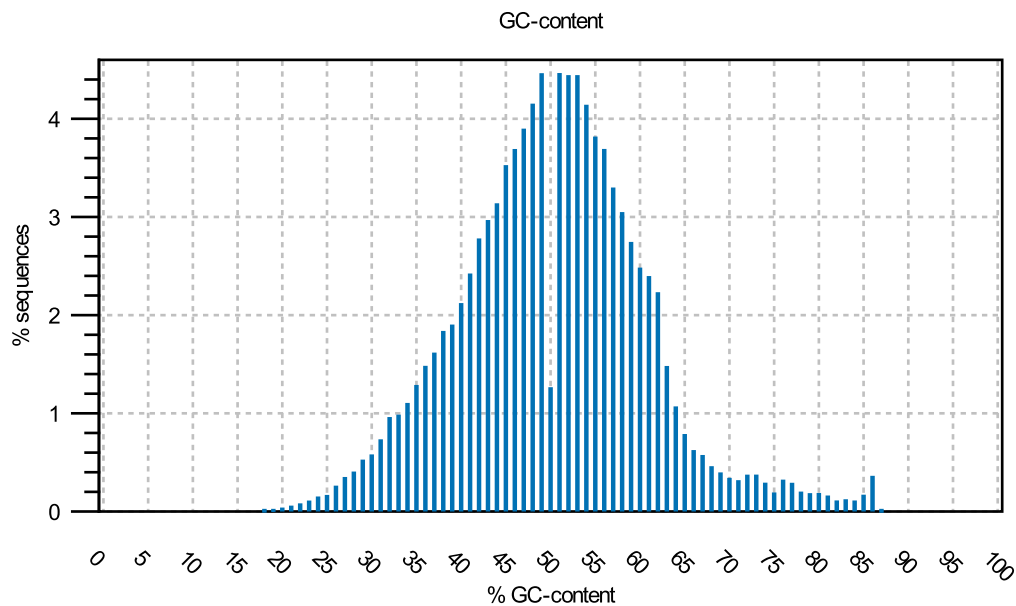

Distribution of GC-contents. The GC-content of a sequence is calculated as the number of GC-bases compared to all bases (including ambiguous bases).

x: relative GC-content of a sequence in percent

y: number of sequences featuring particular GC-percentages normalized to the total number of sequences

## 2.3 Ambiguous base-content

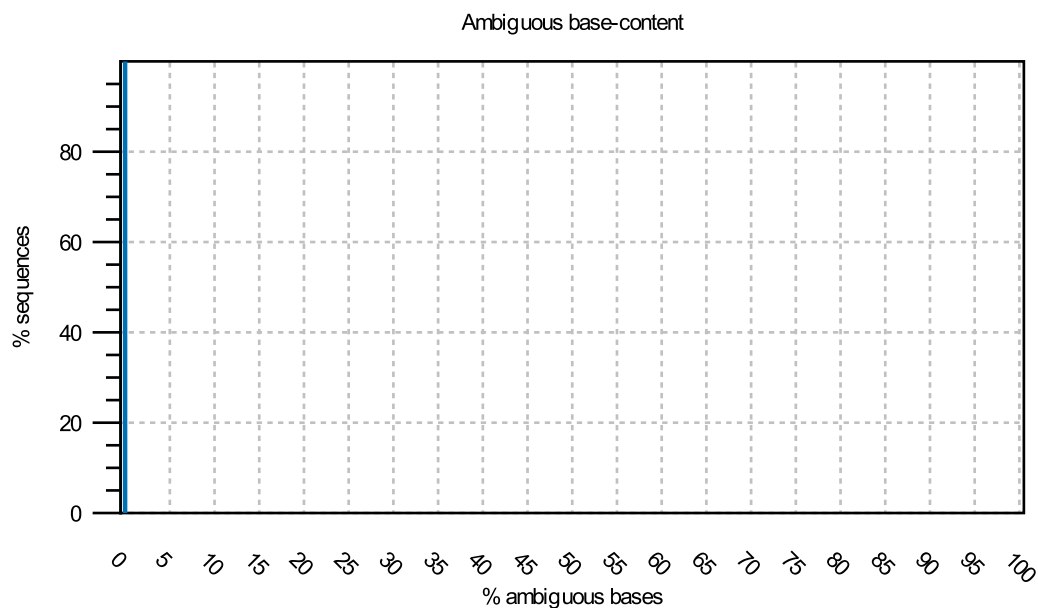

Distribution of N-contents. The N-content of a sequence is calculated as the number of ambiguous bases compared to all bases.

x: relative N-content of a sequence in percent

y: number of sequences featuring particular N-percentages normalized to the total number of sequences

## 2.4 Quality distribution

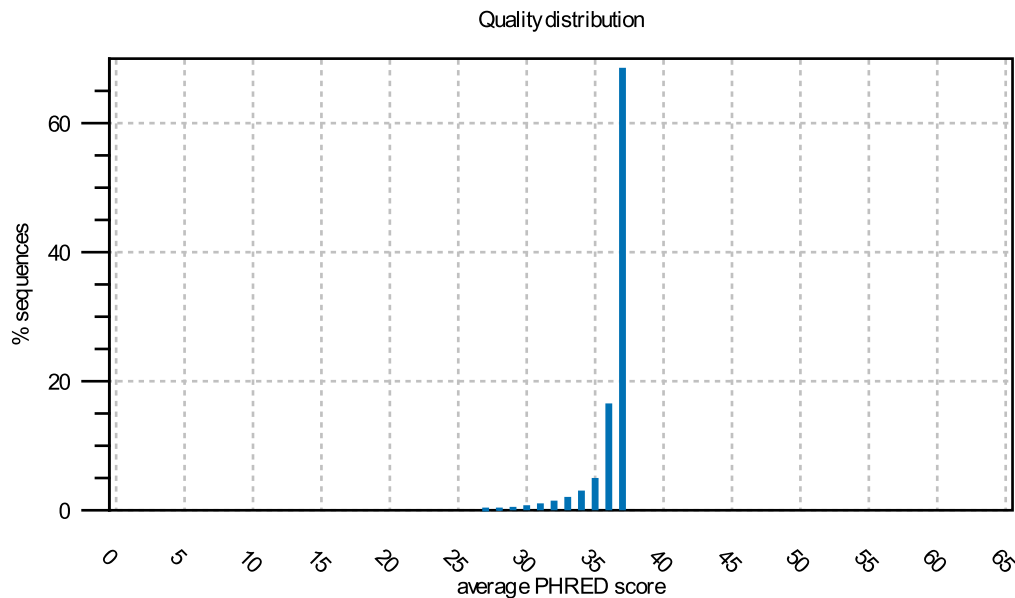

Distribution of average sequence quality scores. The quality of a sequence is calculated as the arithmetic mean of its base qualities.

x: PHRED-score

y: number of sequences observed at that qual. score normalized to the total number of sequences

## 3. Per-base analysis

### 3.1 Coverage

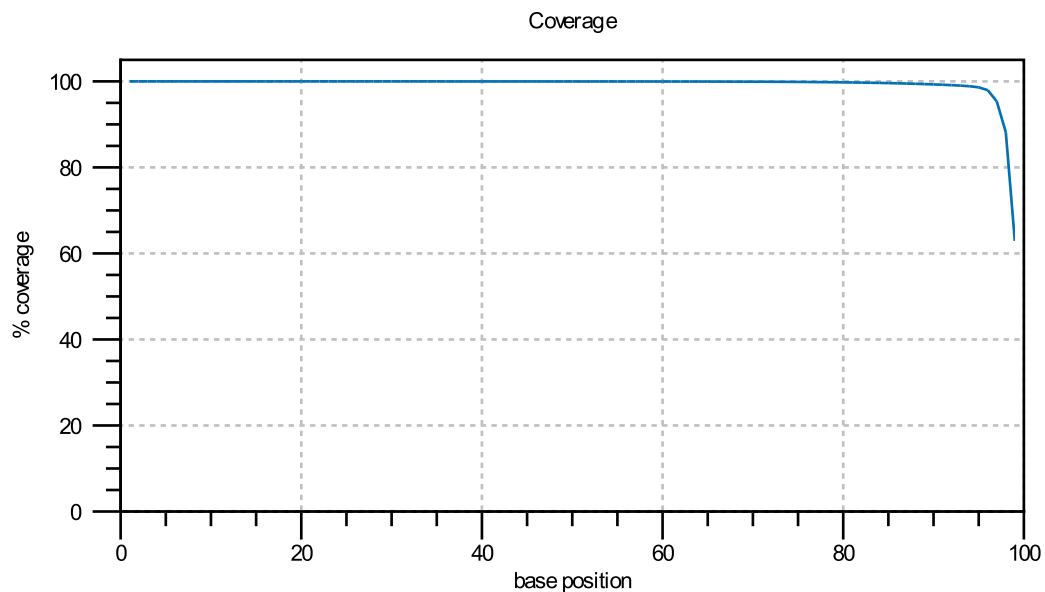

The number of sequences that support (cover) the individual base positions. In cases of untrimmed Illumina reads it will just contain a line.

x: base position

y: number of sequences covering individual base positions normalized to the total number of sequences

### 3.2 Nucleotide contributions

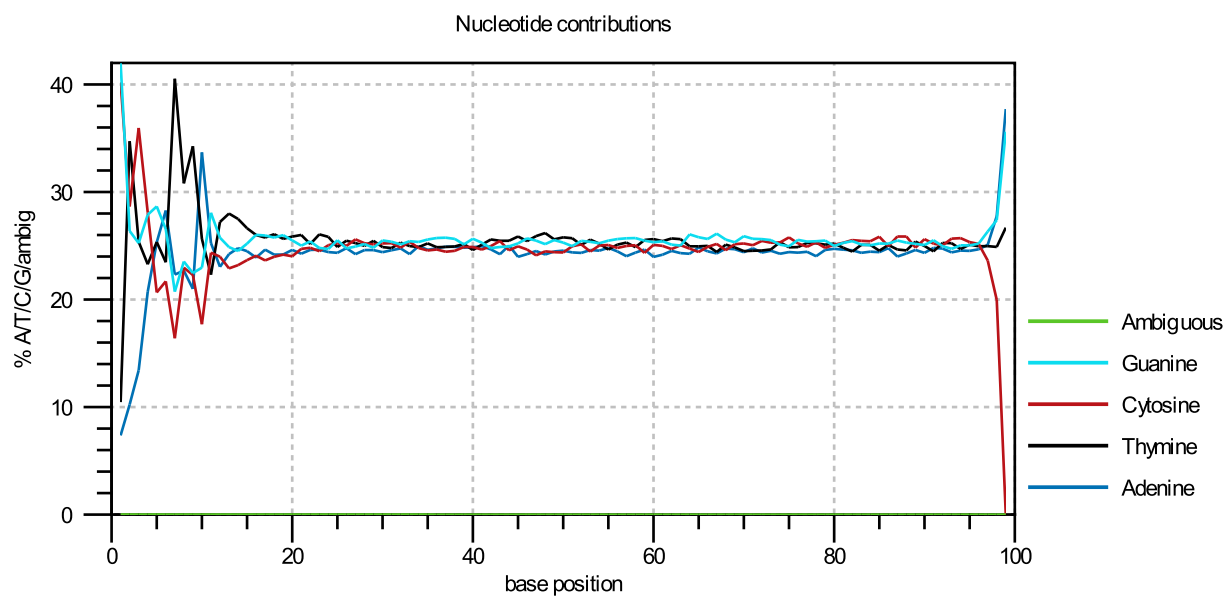

Coverages for the four DNA nucleotides and ambiguous bases.

x: base position

y: number of nucleotides observed per type normalized to the total number of nucleotides observed at that position

### 3.3 GC-content

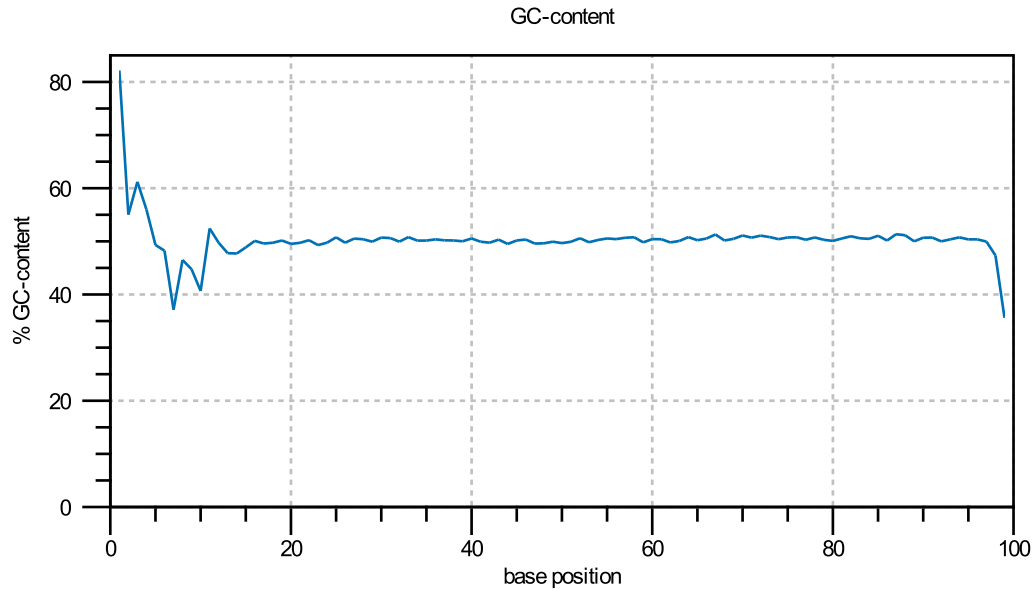

Combined coverage of G- and C-bases.

x: base position

y: number of G- and C-bases observed at current position normalized to the total number of bases observed at that position

### 3.4 Ambiguous base-content

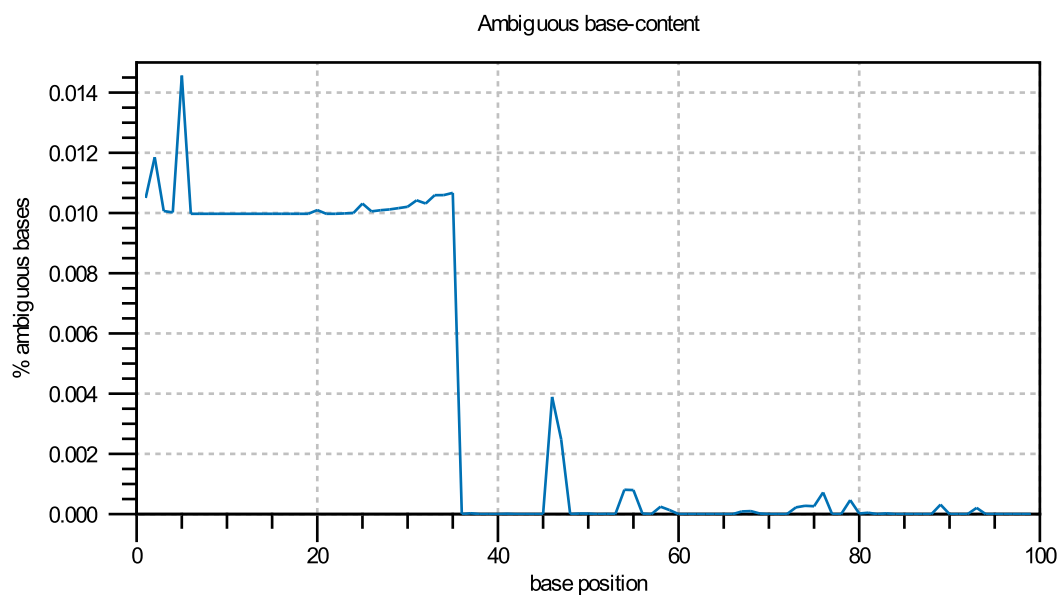

Combined coverage of ambiguous bases.

x: base position

y: number of ambiguous bases observed at current position normalized to the total number of bases observed at that position

### 3.5 Quality distribution

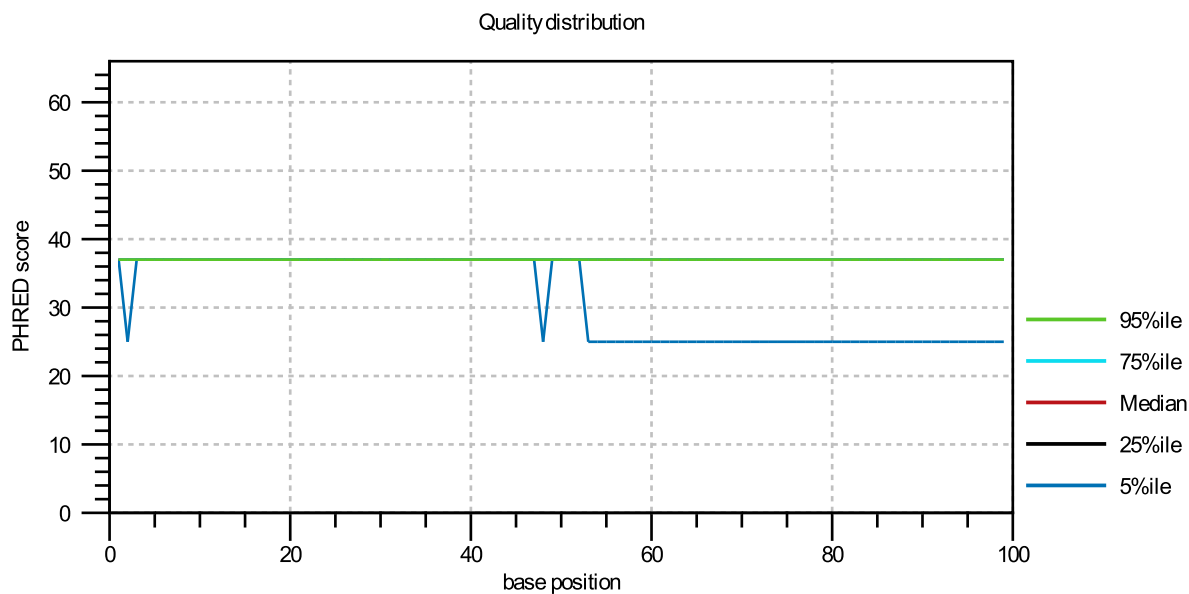

Base-quality distribution along the base positions.

x: base position

y: median & percentiles of quality scores observed at that base position

## 4. Over-representation analyses



## 4.1 Enriched 5-mers

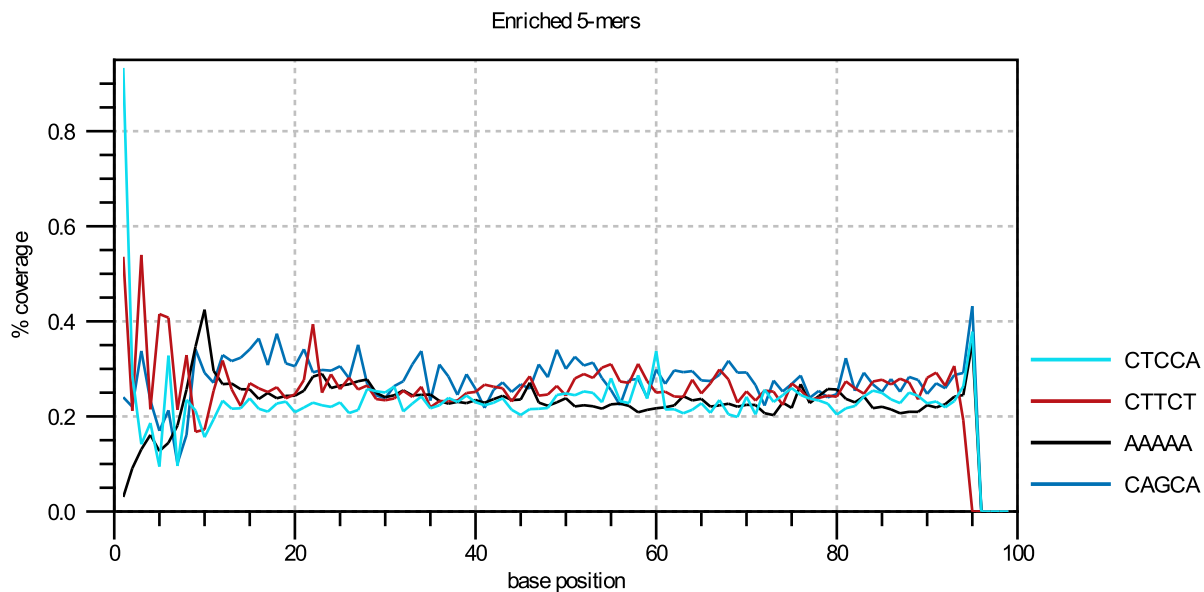

The five most-overrepresented 5-mers. The over-representation of a 5-mer is calculated as the ratio of the observed and expected 5-mer frequency. The expected frequency is calculated as product of the empirical nucleotide probabilities that make up the 5-mer. (5-mers that contain ambiguous bases are ignored)

x: base position

y: number of times a 5-mer has been observed normalized to all 5-mers observed at that position

## 4.2 Sequence duplication levels

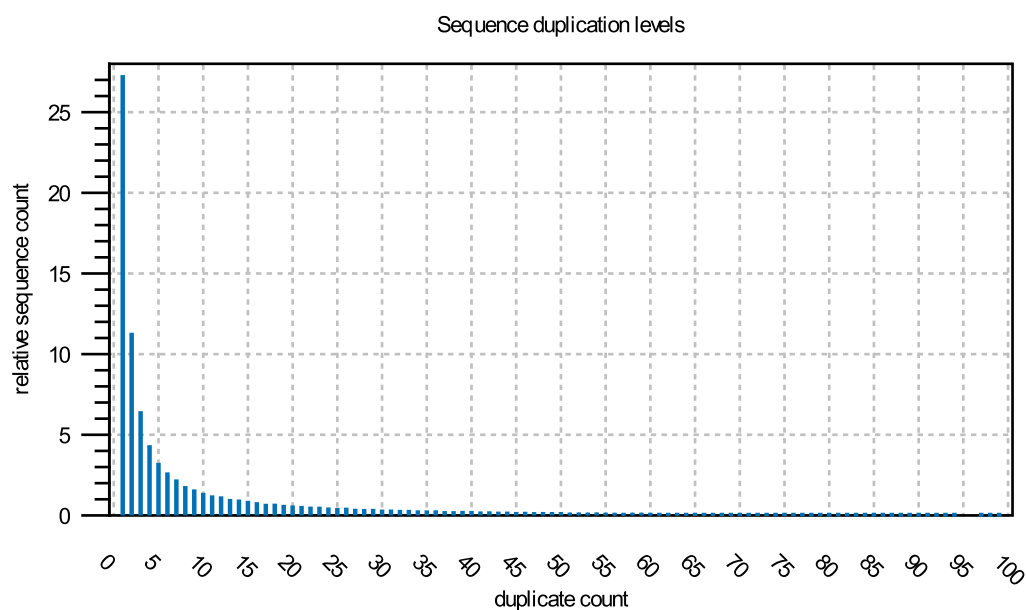

Duplication level distribution. Duplication levels are simply the count of how often a particular sequence has been found.

x: duplicate count

y: number of sequences that have been found that many times normalized to the number of unique sequences

## **4.3 Duplicated sequences**

A table of over-represented sequences is given in the supplementary report

# 1. Summary

|                               |                               |
|-------------------------------|-------------------------------|
| Creation date:                | Fri Dec 23 14:30:19 AEDT 2022 |
| Generated by:                 | 14048742                      |
| Software:                     | CLC Genomics Workbench 22.0   |
| Based upon:                   | 1 data set                    |
| DL1_S7:                       | 71,673,917 sequences          |
| Total sequences in data set   | 71,673,917 sequences          |
| Total nucleotides in data set | 7,045,249,385 nucleotides     |

## 2. Per-sequence analysis

### 2.1 Lengths distribution

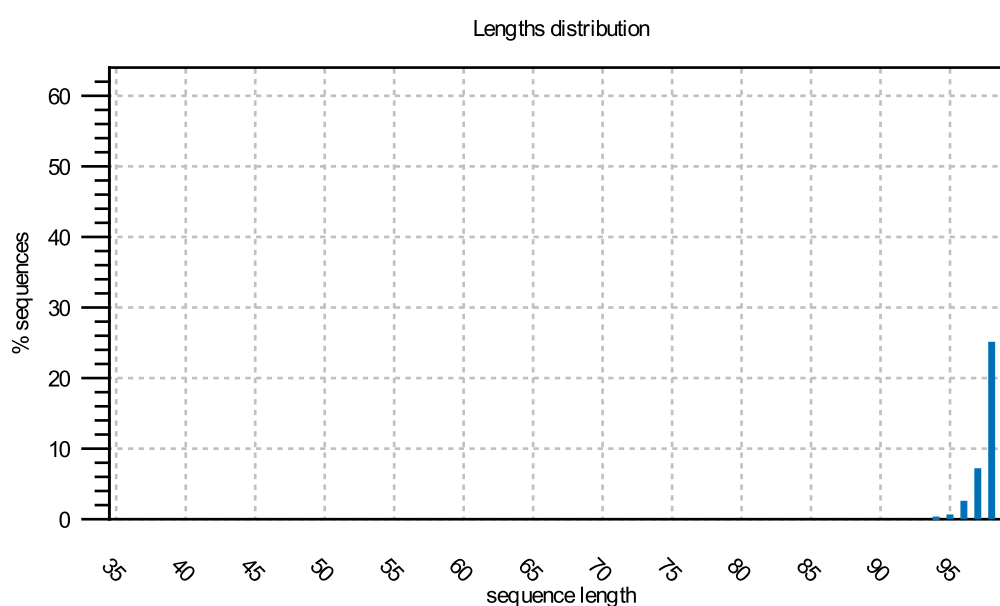

Distribution of sequence lengths. In cases of untrimmed Illumina reads it will just contain a single peak.

x: sequence length in base-pairs

y: number of sequences featuring a particular length normalized to the total number of sequences

## 2.2 GC-content

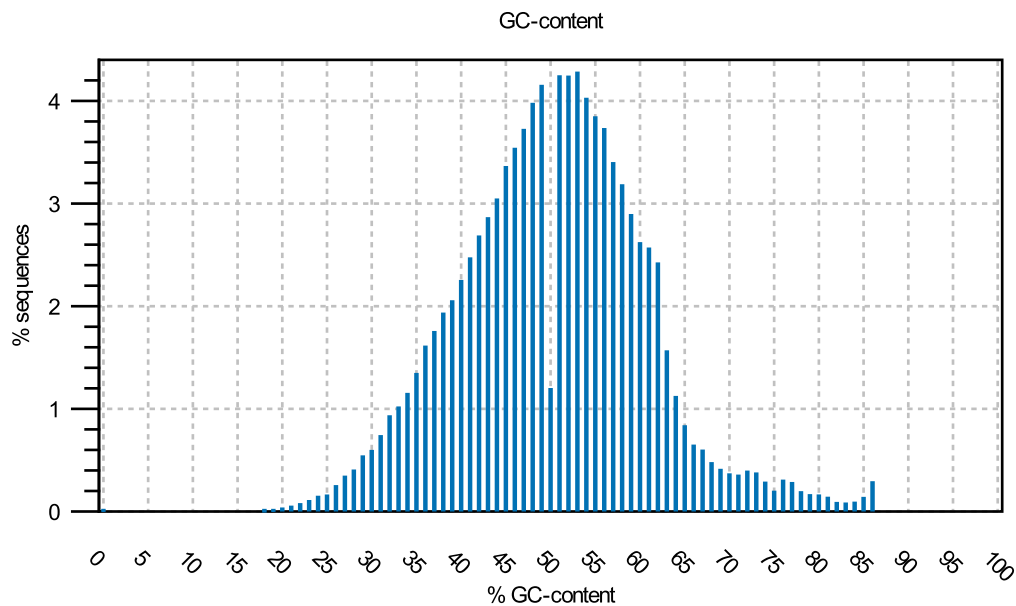

Distribution of GC-contents. The GC-content of a sequence is calculated as the number of GC-bases compared to all bases (including ambiguous bases).

x: relative GC-content of a sequence in percent

y: number of sequences featuring particular GC-percentages normalized to the total number of sequences

## 2.3 Ambiguous base-content

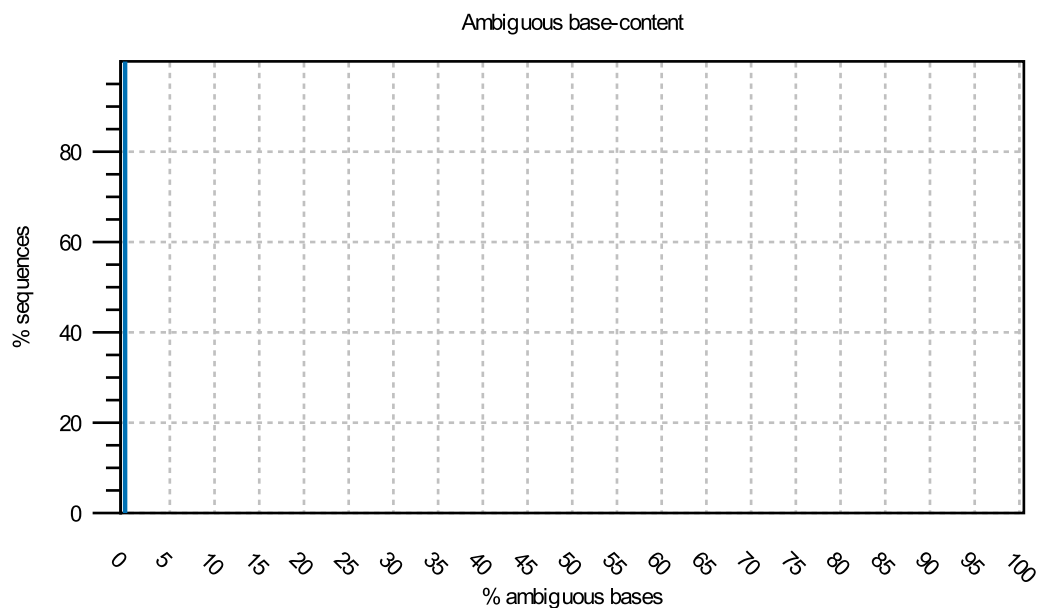

Distribution of N-contents. The N-content of a sequence is calculated as the number of ambiguous bases compared to all bases.

x: relative N-content of a sequence in percent

y: number of sequences featuring particular N-percentages normalized to the total number of sequences

## 2.4 Quality distribution

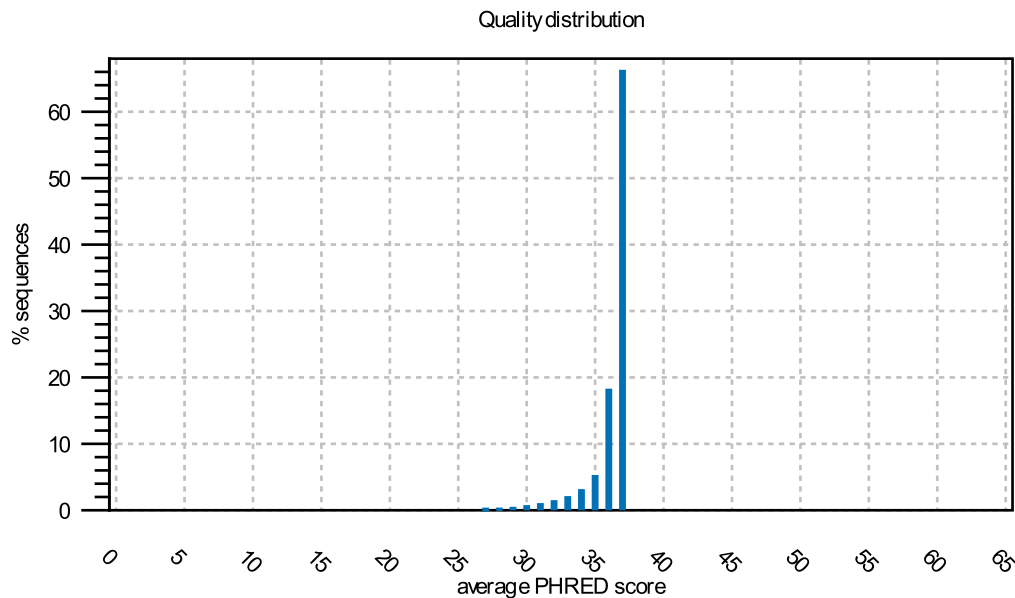

Distribution of average sequence quality scores. The quality of a sequence is calculated as the arithmetic mean of its base qualities.

x: PHRED-score

y: number of sequences observed at that qual. score normalized to the total number of sequences

## 3. Per-base analysis

## 3.1 Coverage

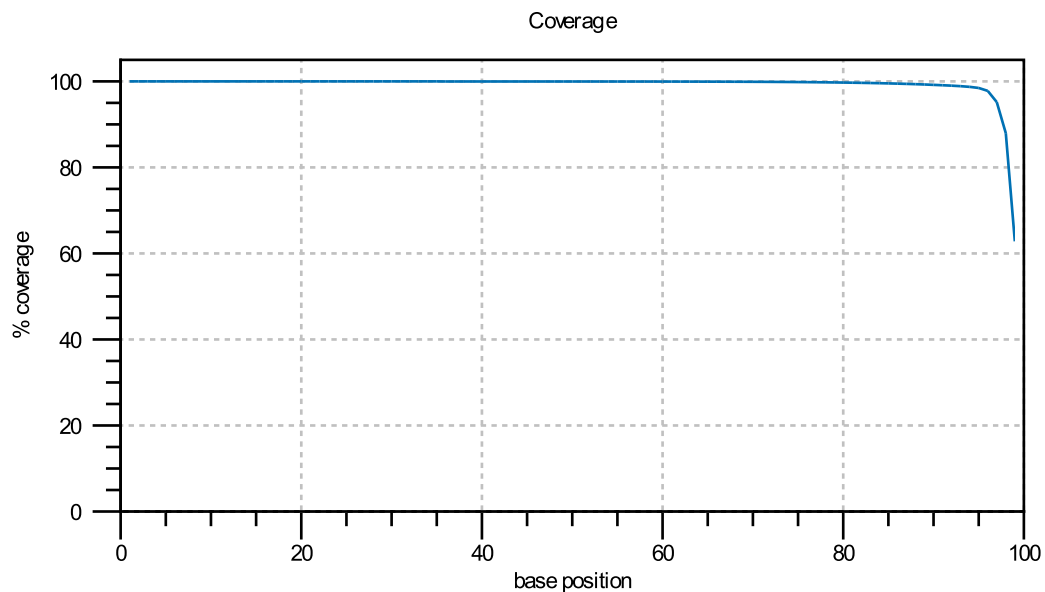

The number of sequences that support (cover) the individual base positions. In cases of untrimmed Illumina reads it will just contain a line.

x: base position

y: number of sequences covering individual base positions normalized to the total number of sequences

## 3.2 Nucleotide contributions

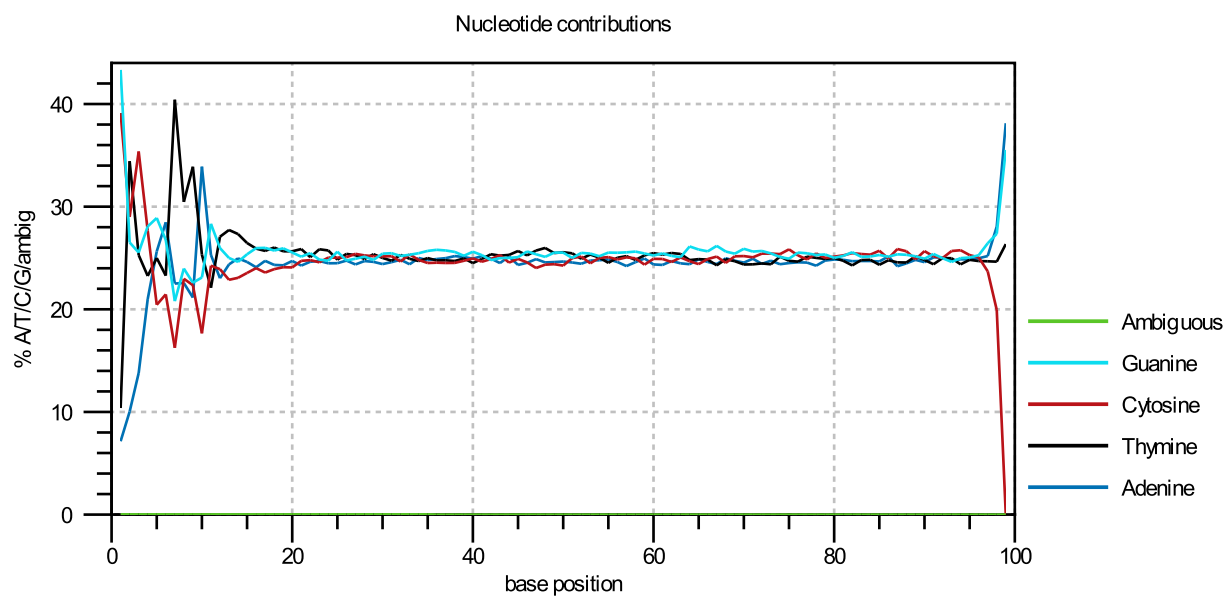

Coverages for the four DNA nucleotides and ambiguous bases.

x: base position

y: number of nucleotides observed per type normalized to the total number of nucleotides observed at that position

### 3.3 GC-content

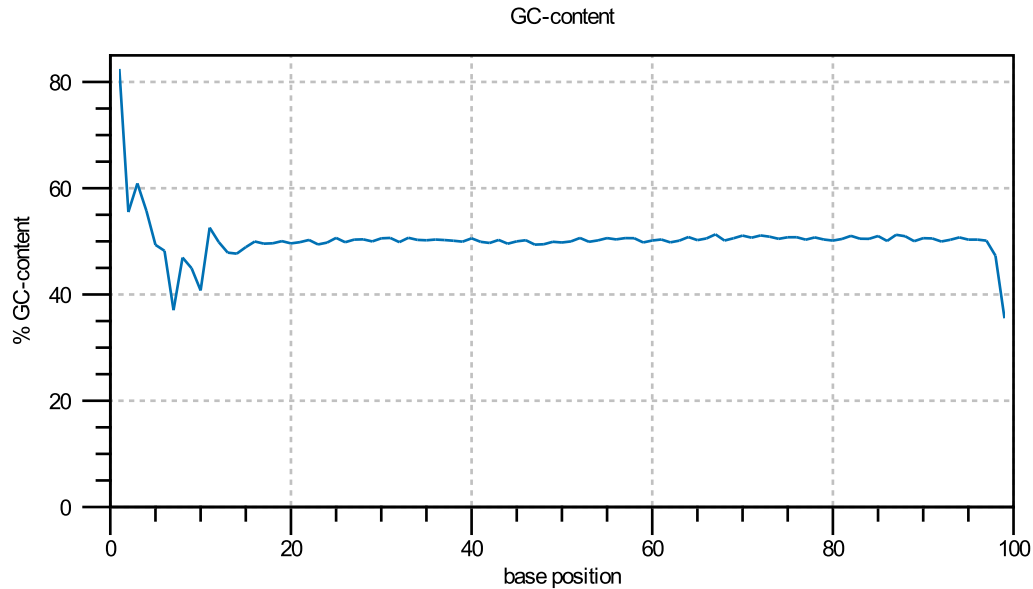

Combined coverage of G- and C-bases.

x: base position

y: number of G- and C-bases observed at current position normalized to the total number of bases observed at that position

### 3.4 Ambiguous base-content

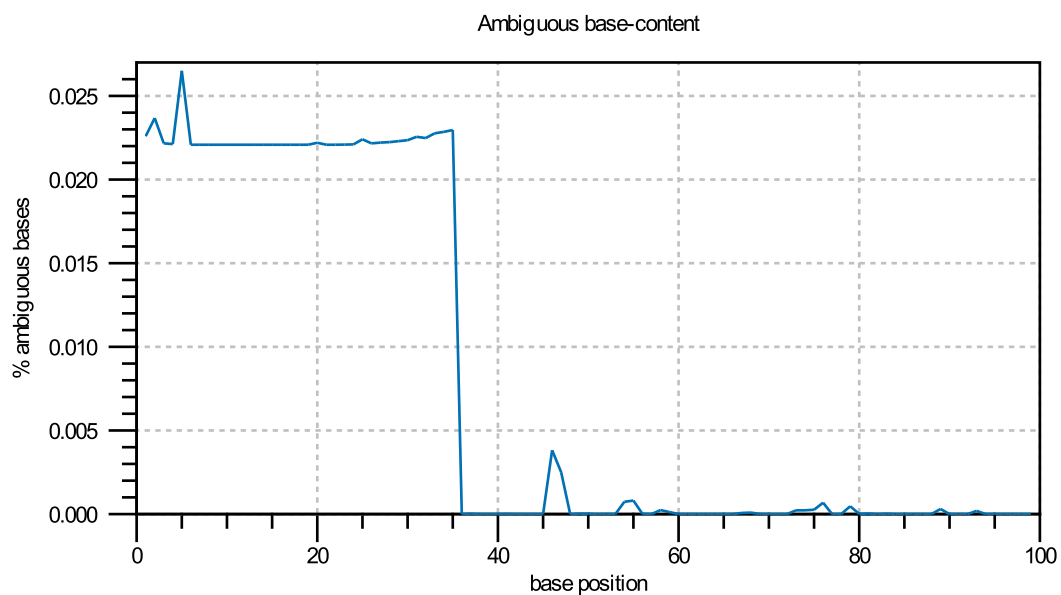

Combined coverage of ambiguous bases.

x: base position

y: number of ambiguous bases observed at current position normalized to the total number of bases observed at that position

### 3.5 Quality distribution

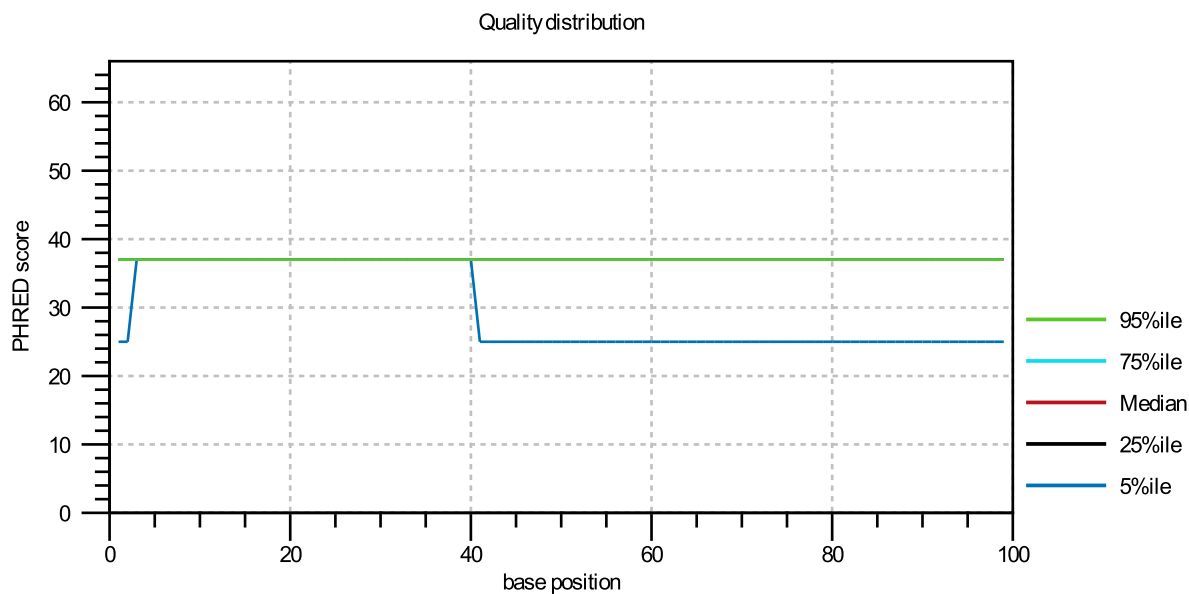

Base-quality distribution along the base positions.

x: base position

y: median & percentiles of quality scores observed at that base position

## 4. Over-representation analyses



## 4.1 Enriched 5-mers

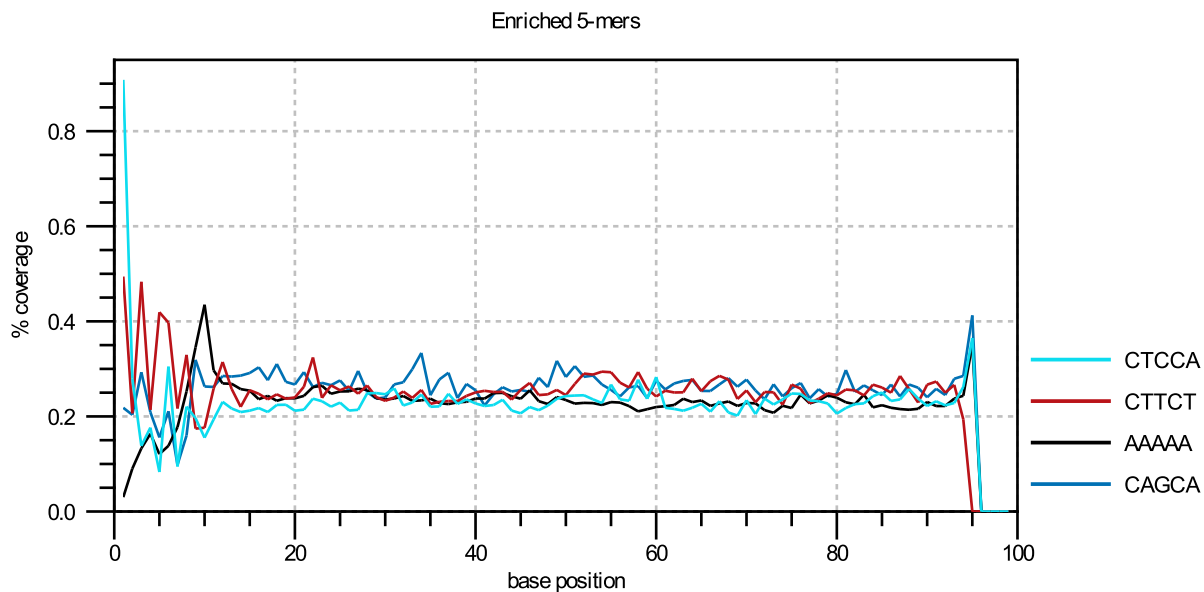

The five most-overrepresented 5-mers. The over-representation of a 5-mer is calculated as the ratio of the observed and expected 5-mer frequency. The expected frequency is calculated as product of the empirical nucleotide probabilities that make up the 5-mer. (5-mers that contain ambiguous bases are ignored)

x: base position

y: number of times a 5-mer has been observed normalized to all 5-mers observed at that position

## 4.2 Sequence duplication levels

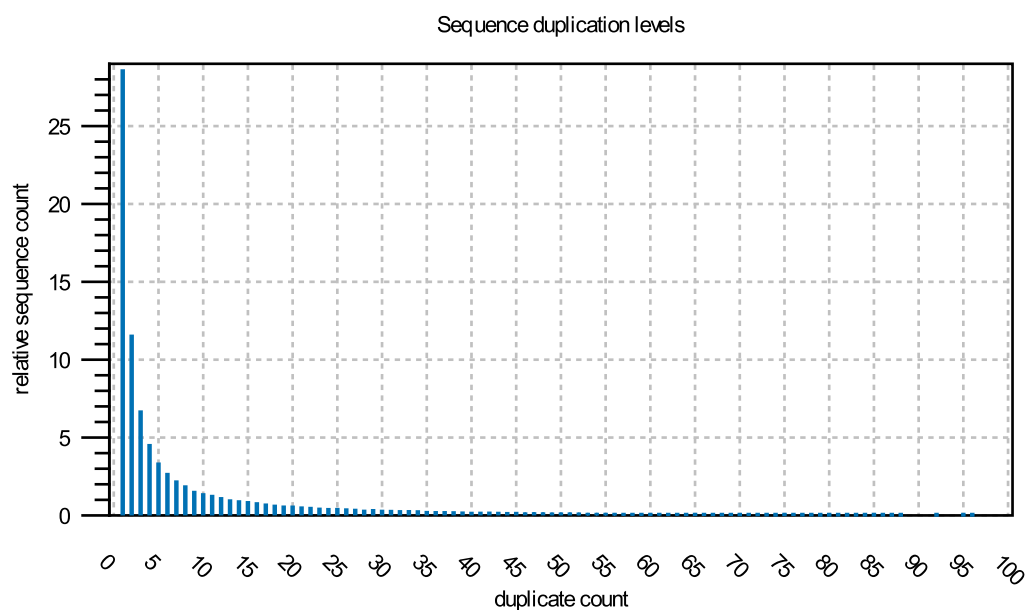

Duplication level distribution. Duplication levels are simply the count of how often a particular sequence has been found.

x: duplicate count

y: number of sequences that have been found that many times normalized to the number of unique sequences

## **4.3 Duplicated sequences**

A table of over-represented sequences is given in the supplementary report

# 1. Summary

|                               |                               |
|-------------------------------|-------------------------------|
| Creation date:                | Fri Dec 23 14:51:52 AEDT 2022 |
| Generated by:                 | 14048742                      |
| Software:                     | CLC Genomics Workbench 22.0   |
| Based upon:                   | 1 data set                    |
| DL2_S3:                       | 78,503,589 sequences          |
| Total sequences in data set   | 78,503,589 sequences          |
| Total nucleotides in data set | 7,712,148,019 nucleotides     |

# 2. Per-sequence analysis

## 2.1 Lengths distribution

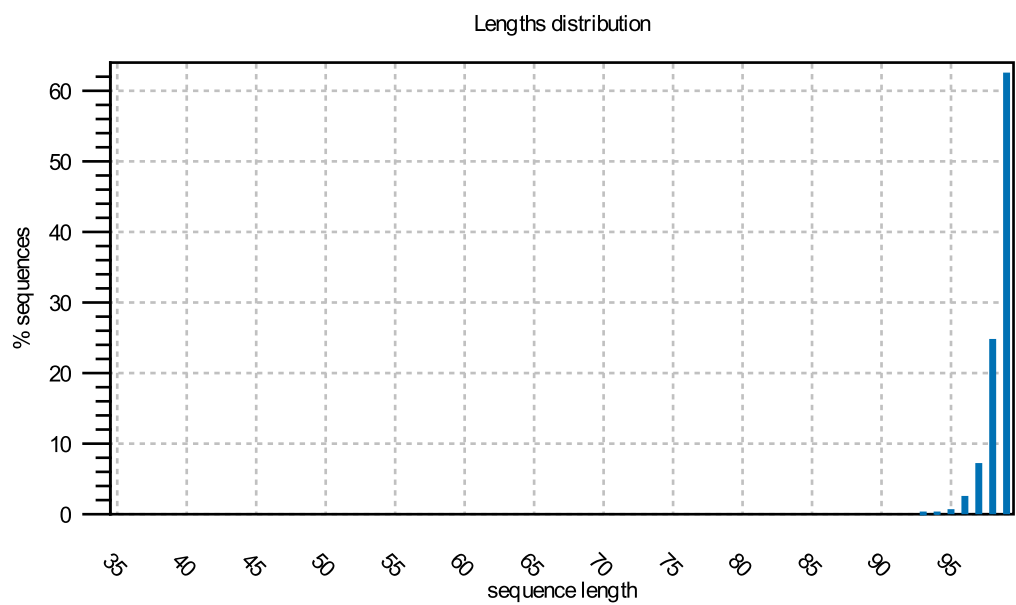

Distribution of sequence lengths. In cases of untrimmed Illumina reads it will just contain a single peak.  
x: sequence length in base-pairs  
y: number of sequences featuring a particular length normalized to the total number of sequences

## 2.2 GC-content

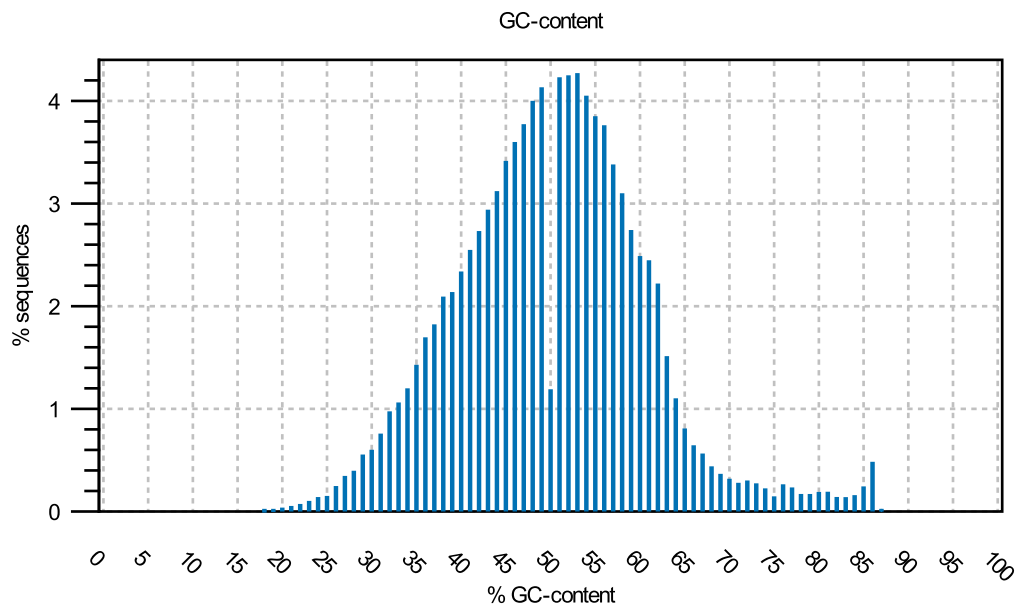

Distribution of GC-contents. The GC-content of a sequence is calculated as the number of GC-bases compared to all bases (including ambiguous bases).

x: relative GC-content of a sequence in percent

y: number of sequences featuring particular GC-percentages normalized to the total number of sequences

## 2.3 Ambiguous base-content



Distribution of N-contents. The N-content of a sequence is calculated as the number of ambiguous bases compared to all bases.

x: relative N-content of a sequence in percent

y: number of sequences featuring particular N-percentages normalized to the total number of sequences

## 2.4 Quality distribution

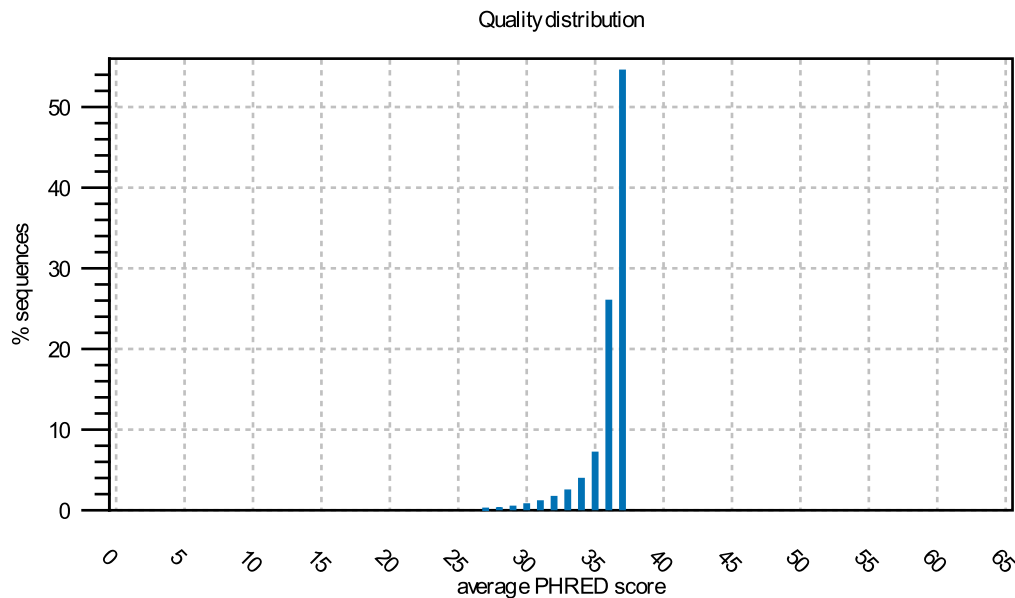

Distribution of average sequence quality scores. The quality of a sequence is calculated as the arithmetic mean of its base qualities.

x: PHRED-score

y: number of sequences observed at that qual. score normalized to the total number of sequences

## 3. Per-base analysis

## 3.1 Coverage

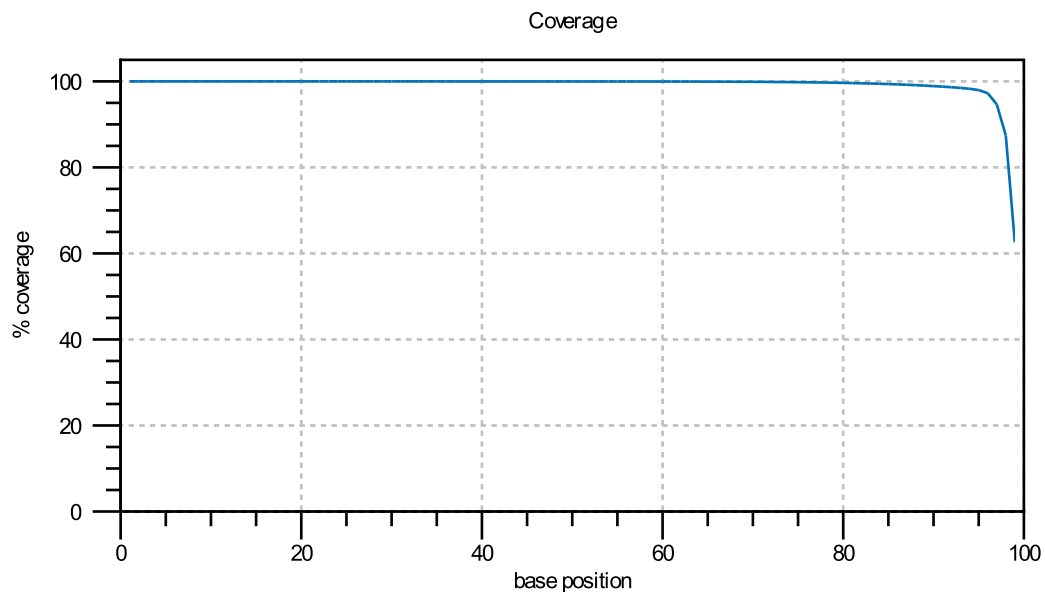

The number of sequences that support (cover) the individual base positions. In cases of untrimmed Illumina reads it will just contain a line.

x: base position

y: number of sequences covering individual base positions normalized to the total number of sequences

## 3.2 Nucleotide contributions

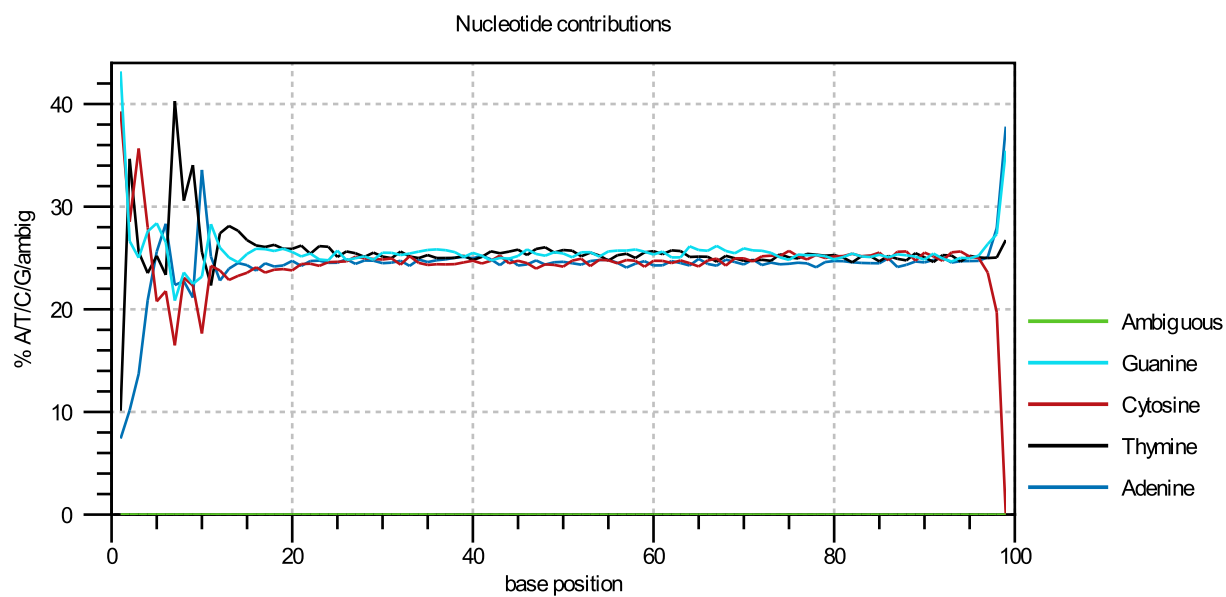

Coverages for the four DNA nucleotides and ambiguous bases.

x: base position

y: number of nucleotides observed per type normalized to the total number of nucleotides observed at that position

### 3.3 GC-content

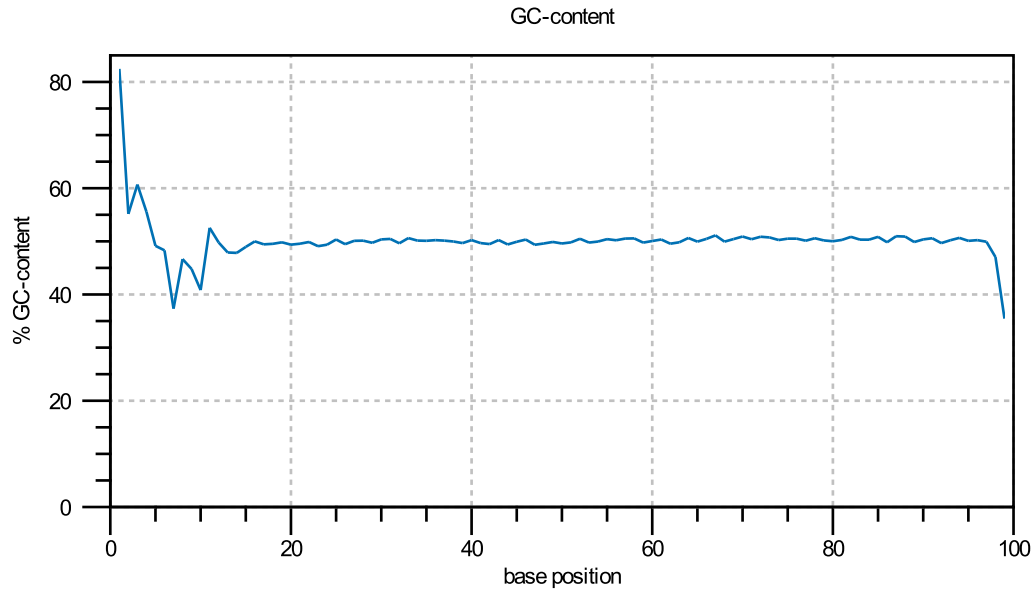

Combined coverage of G- and C-bases.

x: base position

y: number of G- and C-bases observed at current position normalized to the total number of bases observed at that position

### 3.4 Ambiguous base-content

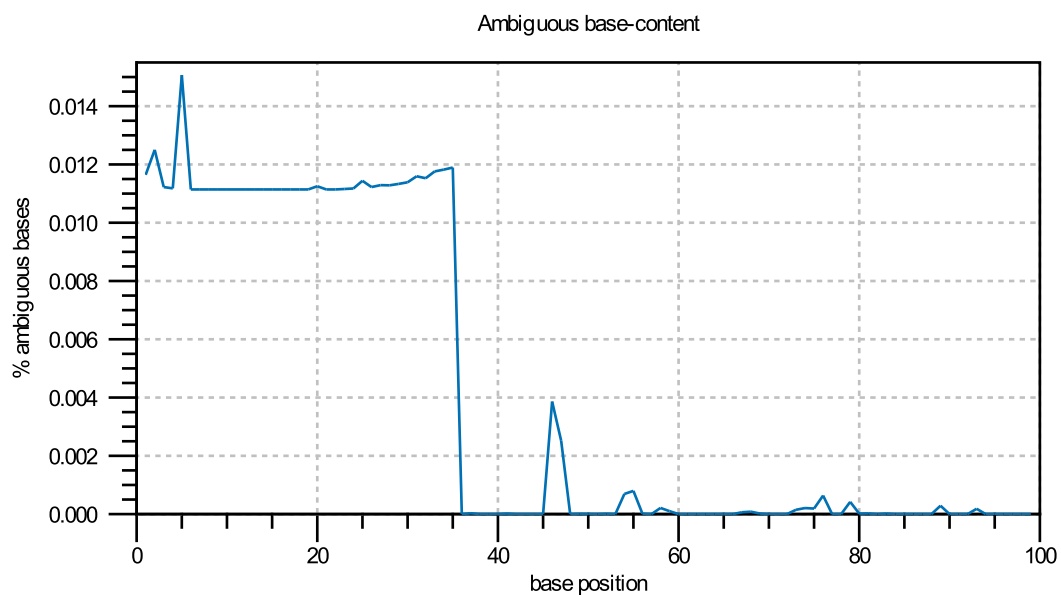

Combined coverage of ambiguous bases.

x: base position

y: number of ambiguous bases observed at current position normalized to the total number of bases observed at that position

### 3.5 Quality distribution

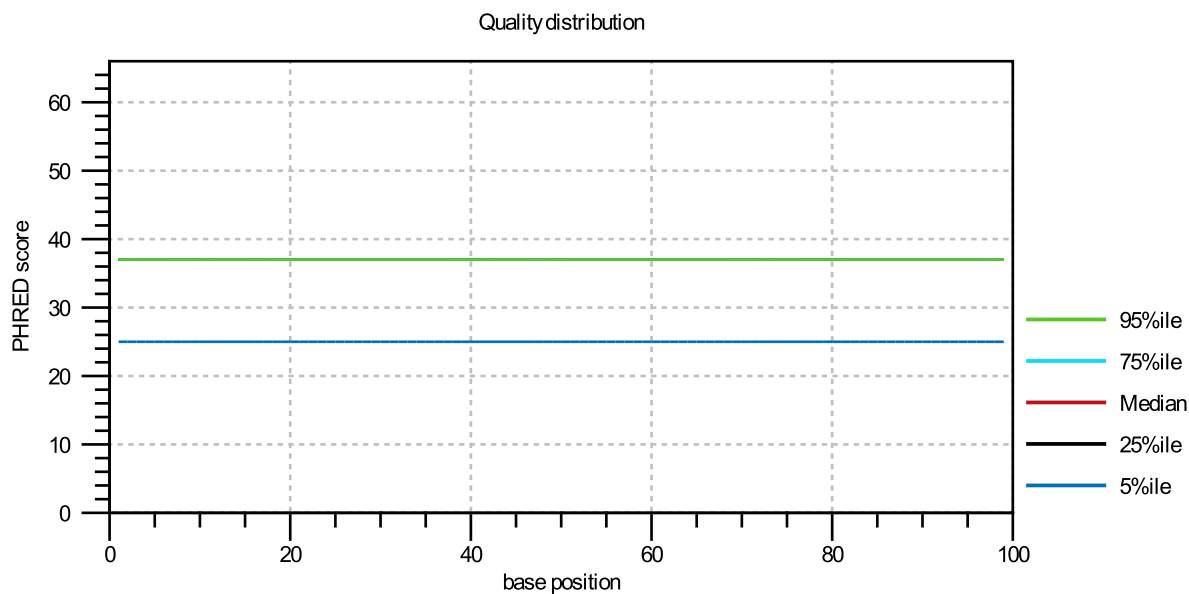

Base-quality distribution along the base positions.

x: base position

y: median & percentiles of quality scores observed at that base position

## 4. Over-representation analyses



## 4.1 Enriched 5-mers

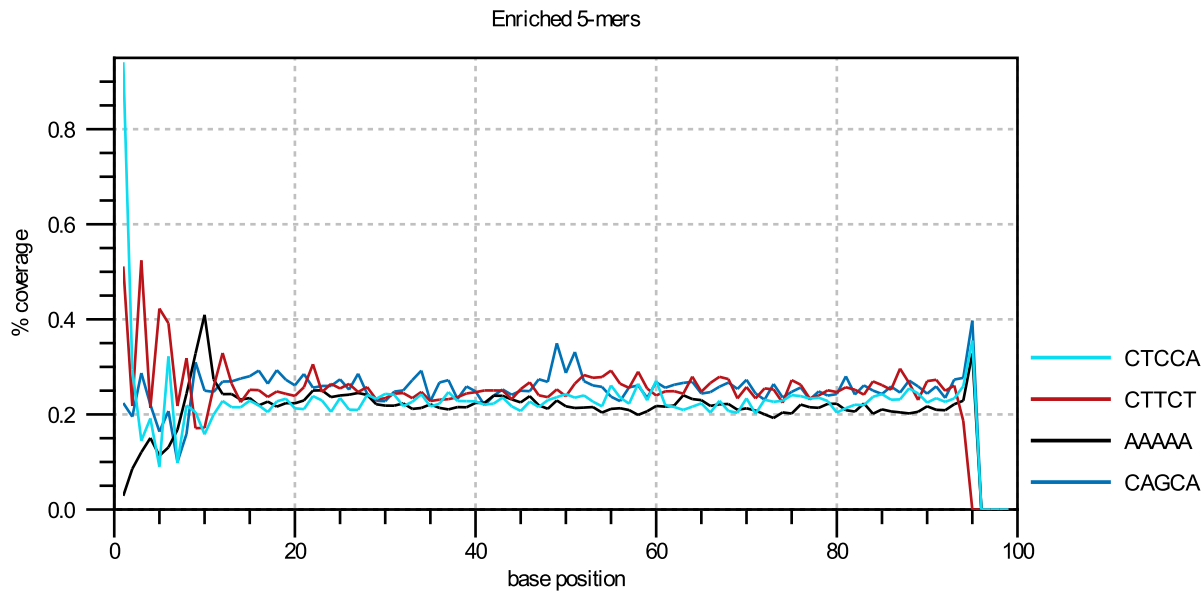

The five most-overrepresented 5-mers. The over-representation of a 5-mer is calculated as the ratio of the observed and expected 5-mer frequency. The expected frequency is calculated as product of the empirical nucleotide probabilities that make up the 5-mer. (5-mers that contain ambiguous bases are ignored)

x: base position

y: number of times a 5-mer has been observed normalized to all 5-mers observed at that position

## 4.2 Sequence duplication levels

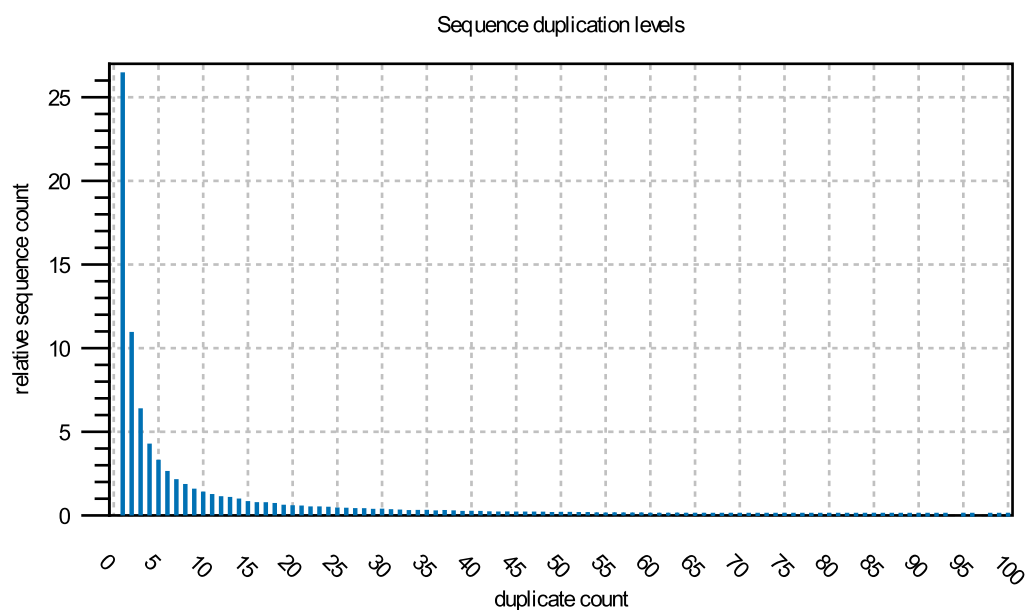

Duplication level distribution. Duplication levels are simply the count of how often a particular sequence has been found.

x: duplicate count

y: number of sequences that have been found that many times normalized to the number of unique sequences

## **4.3 Duplicated sequences**

A table of over-represented sequences is given in the supplementary report

# 1. Summary

|                               |                               |
|-------------------------------|-------------------------------|
| Creation date:                | Fri Dec 23 15:15:49 AEDT 2022 |
| Generated by:                 | 14048742                      |
| Software:                     | CLC Genomics Workbench 22.0   |
| Based upon:                   | 1 data set                    |
| DL3_S2:                       | 75,928,949 sequences          |
| Total sequences in data set   | 75,928,949 sequences          |
| Total nucleotides in data set | 7,464,883,580 nucleotides     |

# 2. Per-sequence analysis

## 2.1 Lengths distribution

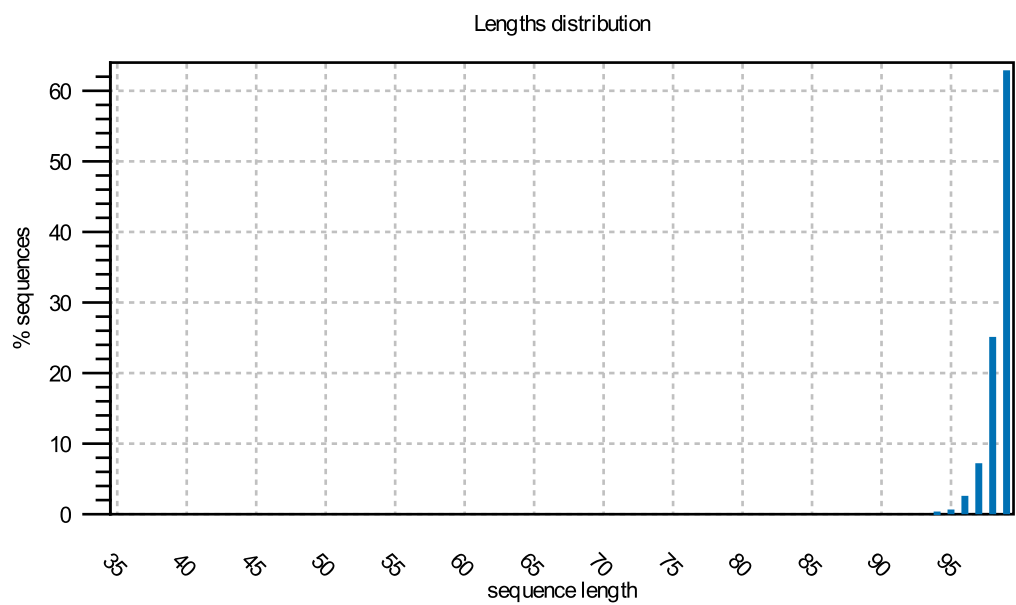

Distribution of sequence lengths. In cases of untrimmed Illumina reads it will just contain a single peak.  
x: sequence length in base-pairs  
y: number of sequences featuring a particular length normalized to the total number of sequences

## 2.2 GC-content

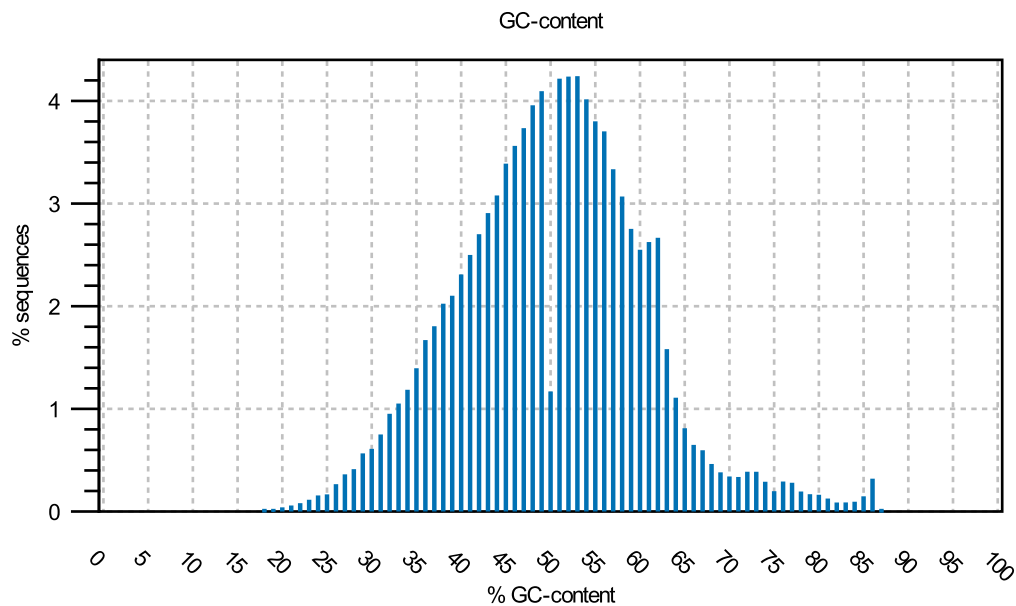

Distribution of GC-contents. The GC-content of a sequence is calculated as the number of GC-bases compared to all bases (including ambiguous bases).

x: relative GC-content of a sequence in percent

y: number of sequences featuring particular GC-percentages normalized to the total number of sequences

## 2.3 Ambiguous base-content

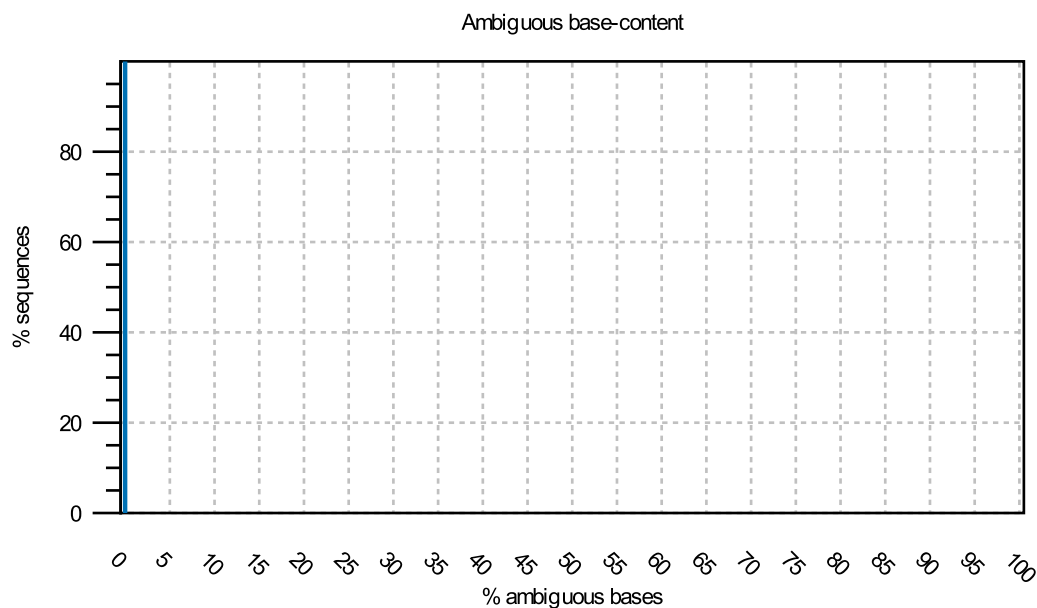

Distribution of N-contents. The N-content of a sequence is calculated as the number of ambiguous bases compared to all bases.

x: relative N-content of a sequence in percent

y: number of sequences featuring particular N-percentages normalized to the total number of sequences

## 2.4 Quality distribution

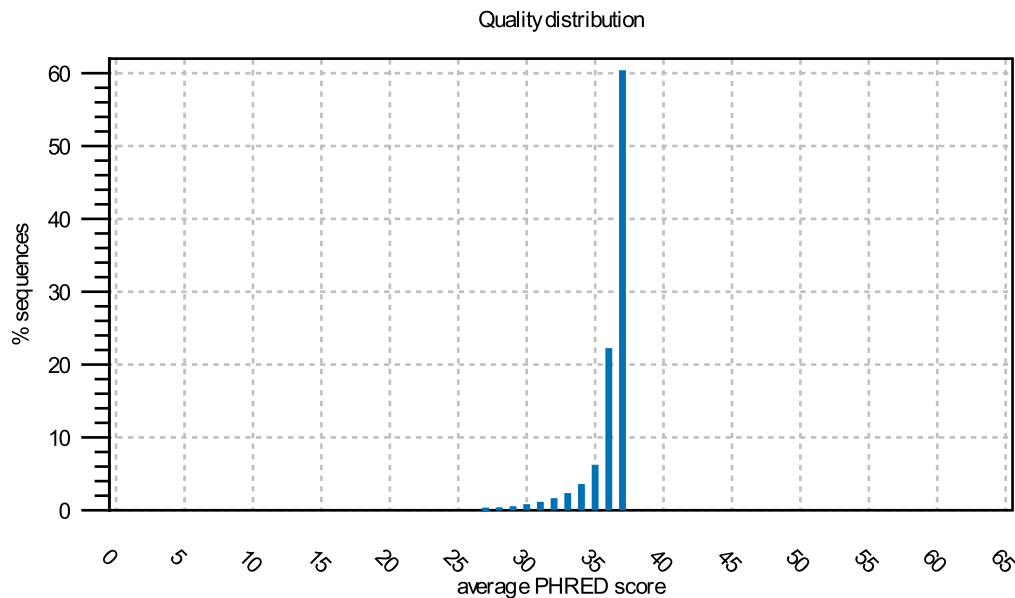

Distribution of average sequence quality scores. The quality of a sequence is calculated as the arithmetic mean of its base qualities.

x: PHRED-score

y: number of sequences observed at that qual. score normalized to the total number of sequences

## 3. Per-base analysis

## 3.1 Coverage

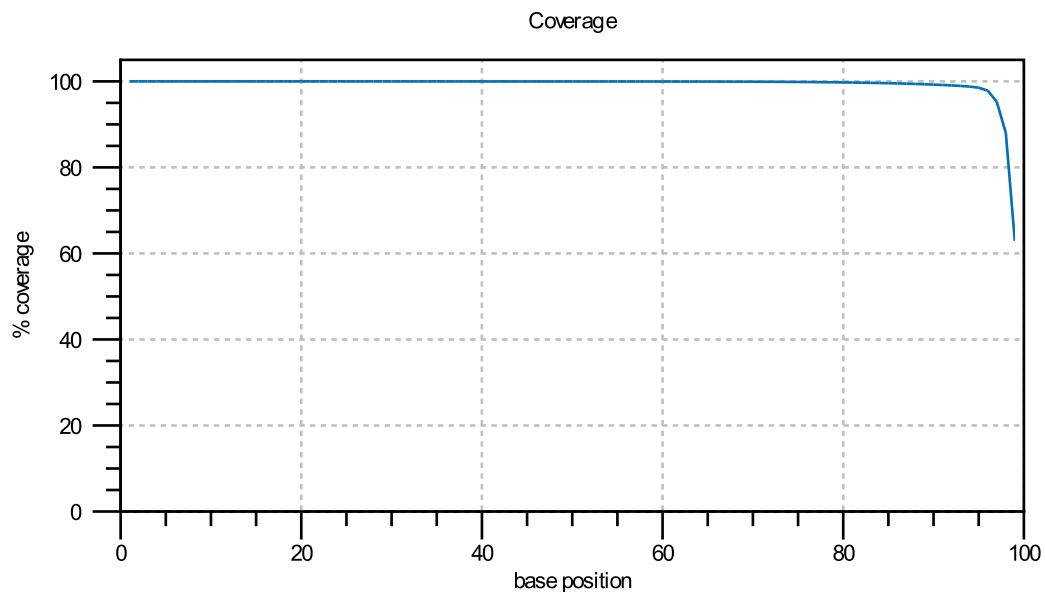

The number of sequences that support (cover) the individual base positions. In cases of untrimmed Illumina reads it will just contain a line.

x: base position

y: number of sequences covering individual base positions normalized to the total number of sequences

## 3.2 Nucleotide contributions

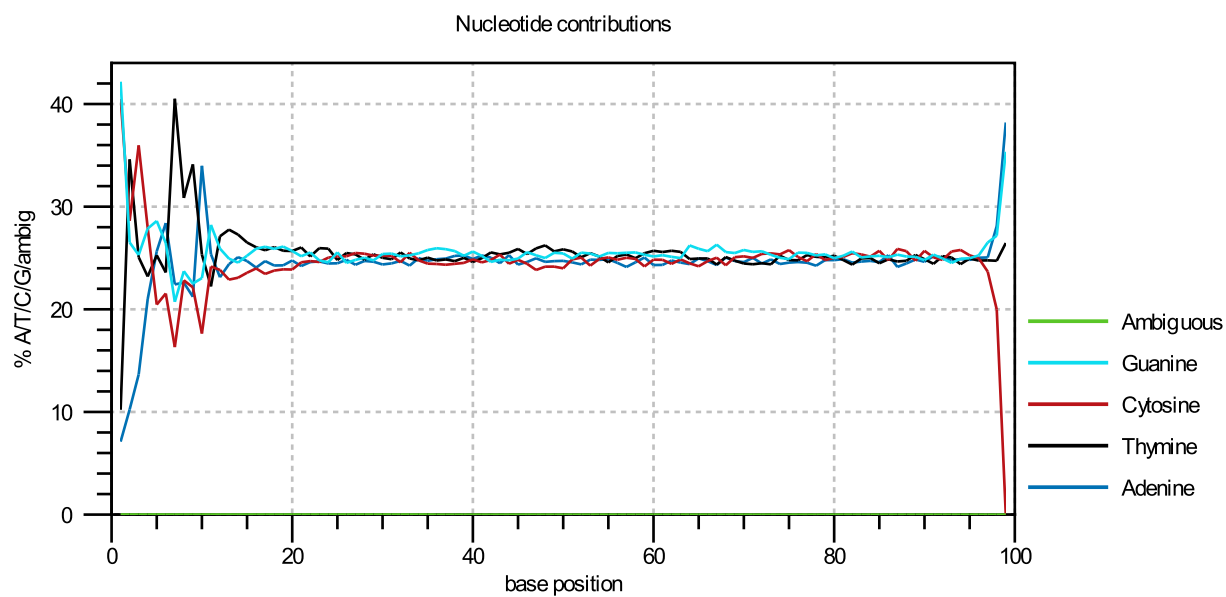

Coverages for the four DNA nucleotides and ambiguous bases.

x: base position

y: number of nucleotides observed per type normalized to the total number of nucleotides observed at that position

### 3.3 GC-content

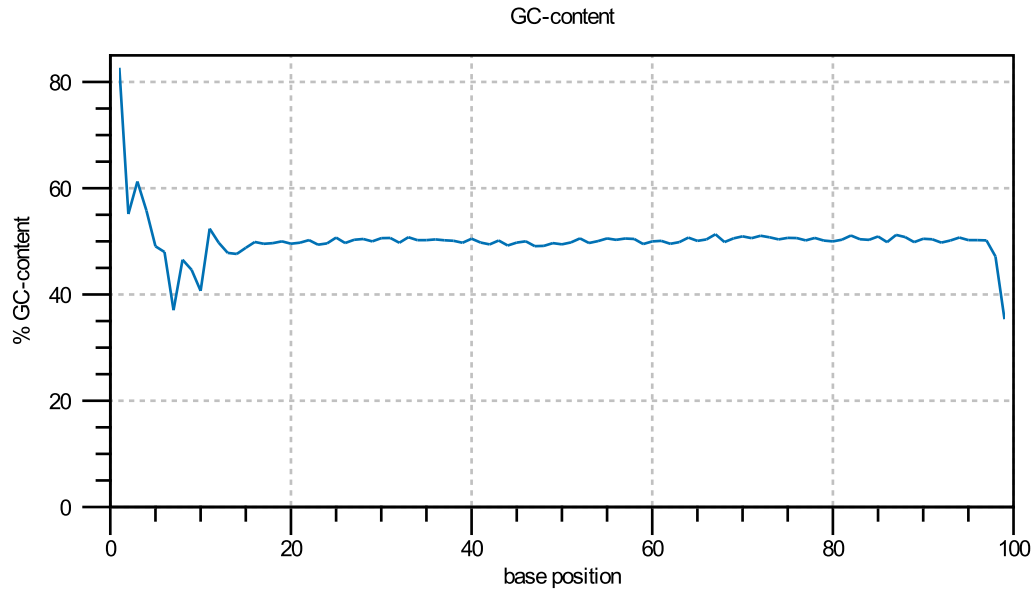

Combined coverage of G- and C-bases.

x: base position

y: number of G- and C-bases observed at current position normalized to the total number of bases observed at that position

### 3.4 Ambiguous base-content

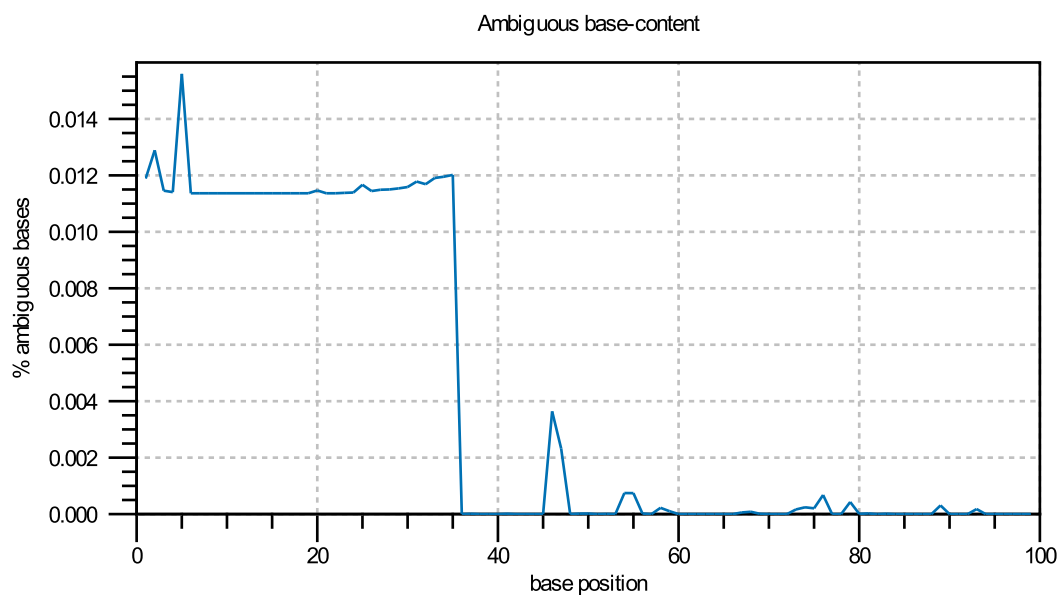

Combined coverage of ambiguous bases.

x: base position

y: number of ambiguous bases observed at current position normalized to the total number of bases observed at that position

### 3.5 Quality distribution

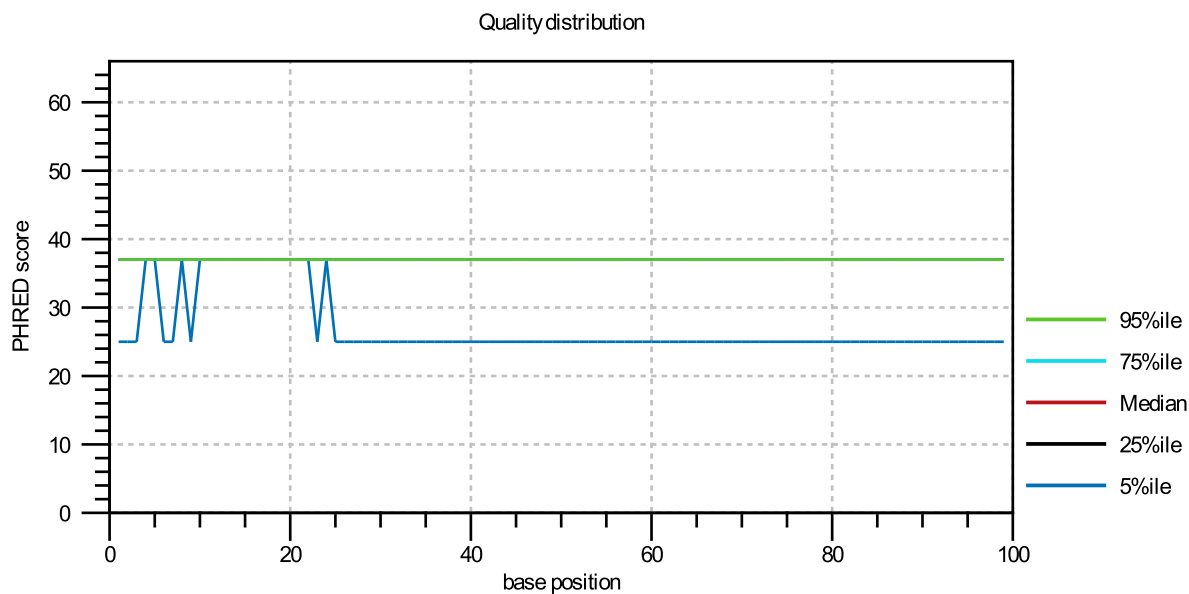

Base-quality distribution along the base positions.

x: base position

y: median & percentiles of quality scores observed at that base position

## 4. Over-representation analyses



## 4.1 Enriched 5-mers

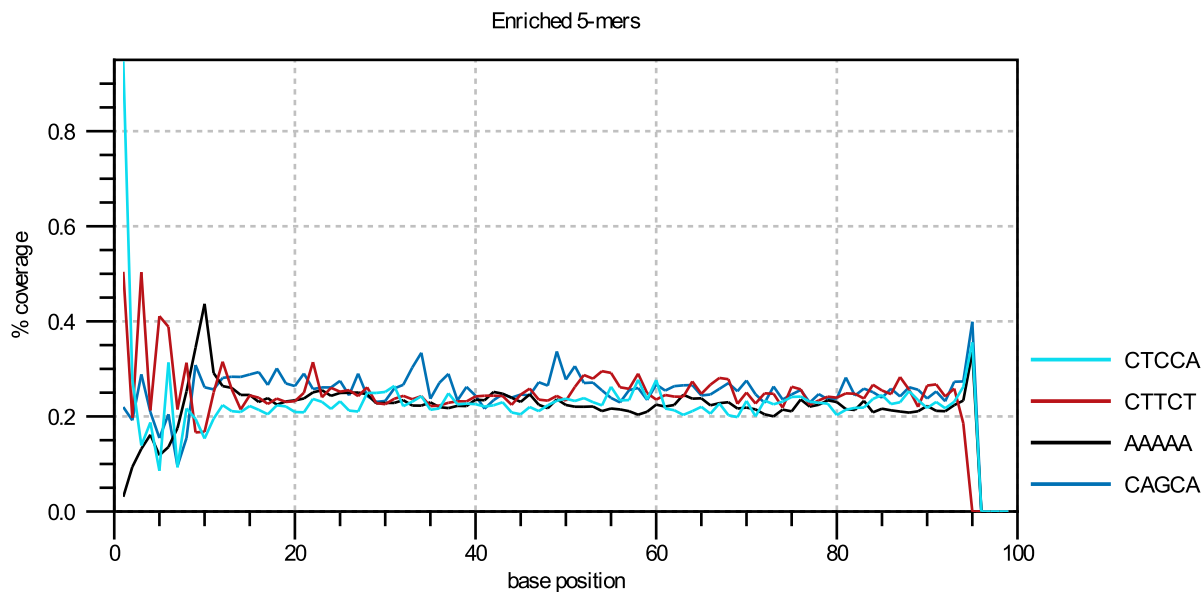

The five most-overrepresented 5-mers. The over-representation of a 5-mer is calculated as the ratio of the observed and expected 5-mer frequency. The expected frequency is calculated as product of the empirical nucleotide probabilities that make up the 5-mer. (5-mers that contain ambiguous bases are ignored)

x: base position

y: number of times a 5-mer has been observed normalized to all 5-mers observed at that position

## 4.2 Sequence duplication levels

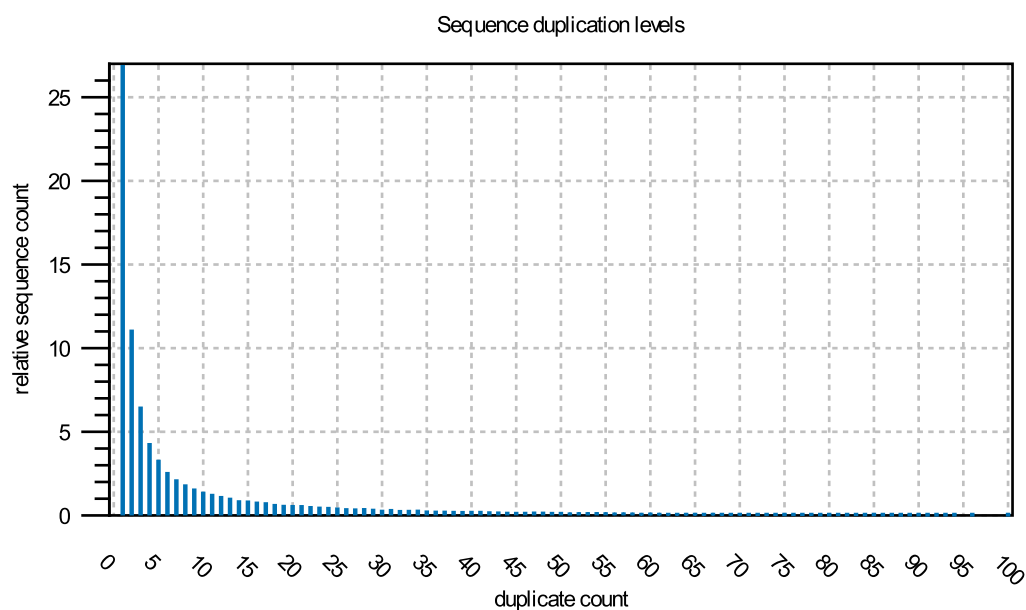

Duplication level distribution. Duplication levels are simply the count of how often a particular sequence has been found.

x: duplicate count

y: number of sequences that have been found that many times normalized to the number of unique sequences

## **4.3 Duplicated sequences**

A table of over-represented sequences is given in the supplementary report

# 1. Summary

|                               |                               |
|-------------------------------|-------------------------------|
| Creation date:                | Fri Dec 23 12:28:20 AEDT 2022 |
| Generated by:                 | 14048742                      |
| Software:                     | CLC Genomics Workbench 22.0   |
| Based upon:                   | 1 data set                    |
| AAV1_S12:                     | 73,054,598 sequences          |
| Total sequences in data set   | 73,054,598 sequences          |
| Total nucleotides in data set | 7,181,818,285 nucleotides     |

# 2. Per-sequence analysis

## 2.1 Lengths distribution

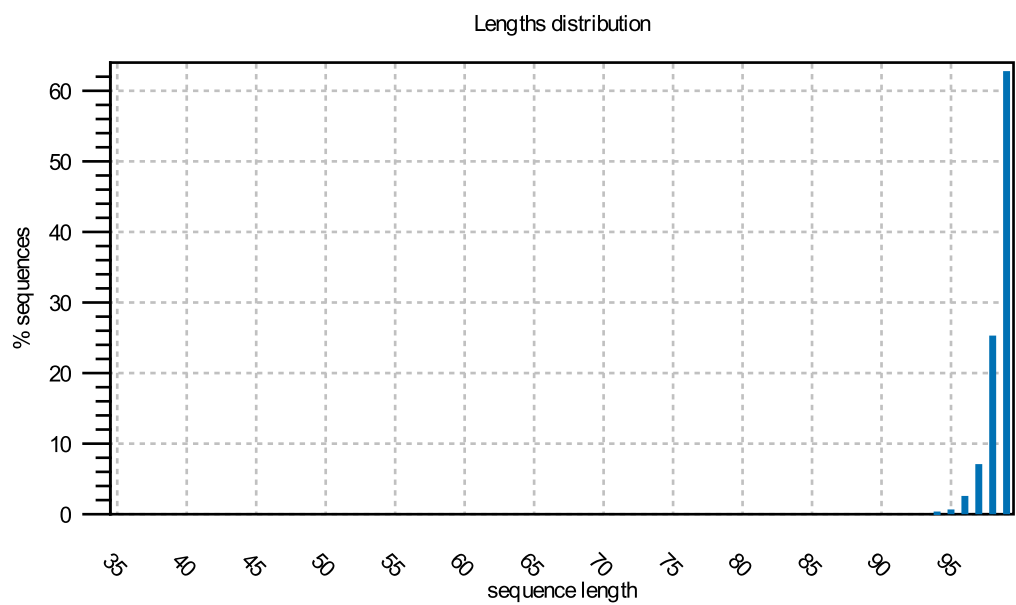

Distribution of sequence lengths. In cases of untrimmed Illumina reads it will just contain a single peak.  
x: sequence length in base-pairs  
y: number of sequences featuring a particular length normalized to the total number of sequences

## 2.2 GC-content

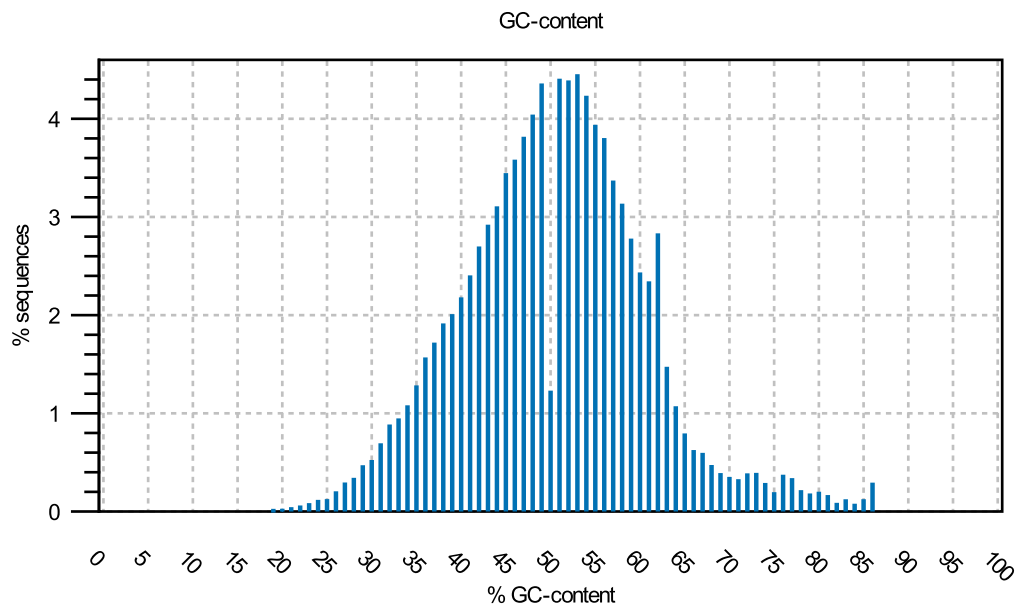

Distribution of GC-contents. The GC-content of a sequence is calculated as the number of GC-bases compared to all bases (including ambiguous bases).

x: relative GC-content of a sequence in percent

y: number of sequences featuring particular GC-percentages normalized to the total number of sequences

## 2.3 Ambiguous base-content

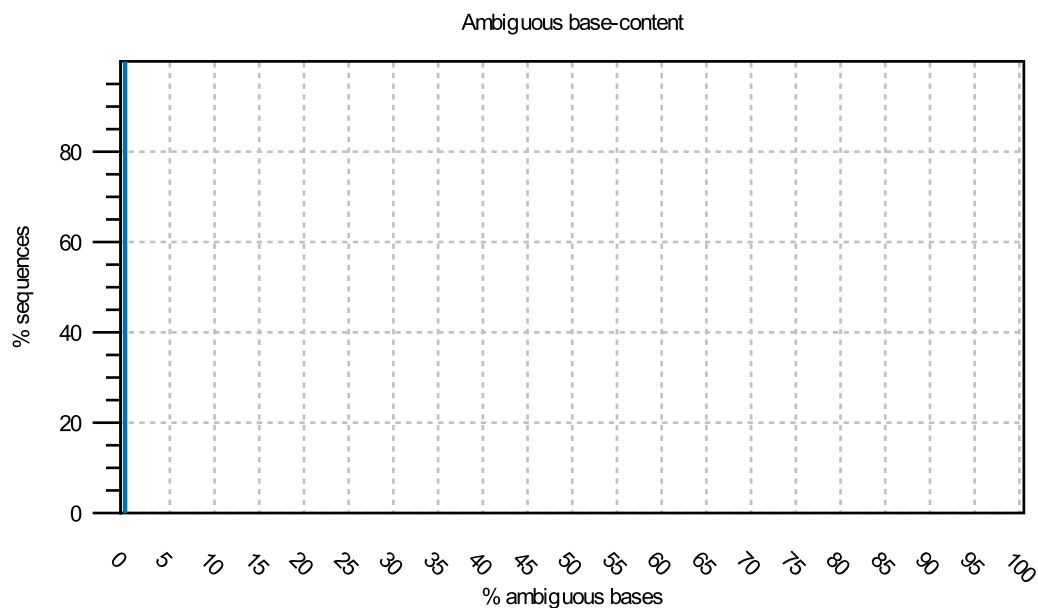

Distribution of N-contents. The N-content of a sequence is calculated as the number of ambiguous bases compared to all bases.

x: relative N-content of a sequence in percent

y: number of sequences featuring particular N-percentages normalized to the total number of sequences

## 2.4 Quality distribution

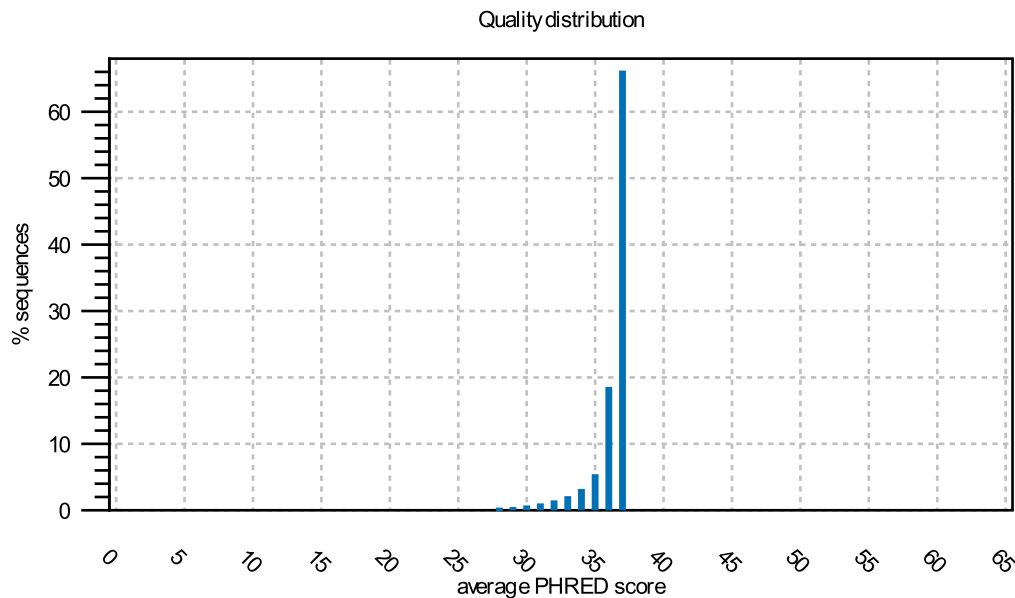

Distribution of average sequence quality scores. The quality of a sequence is calculated as the arithmetic mean of its base qualities.

x: PHRED-score

y: number of sequences observed at that qual. score normalized to the total number of sequences

## 3. Per-base analysis

### 3.1 Coverage

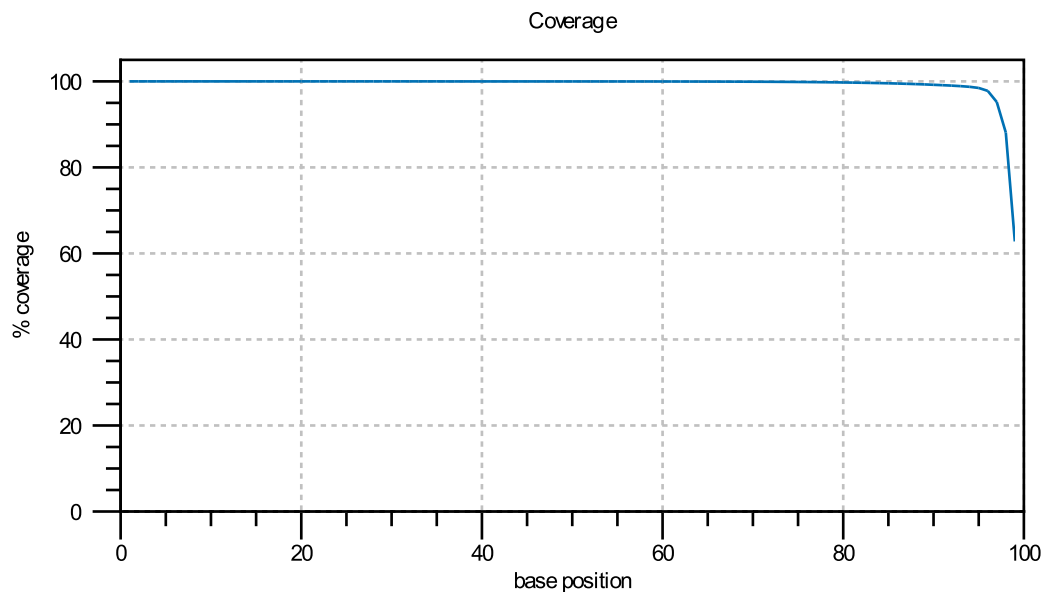

The number of sequences that support (cover) the individual base positions. In cases of untrimmed Illumina reads it will just contain a line.

x: base position

y: number of sequences covering individual base positions normalized to the total number of sequences

### 3.2 Nucleotide contributions

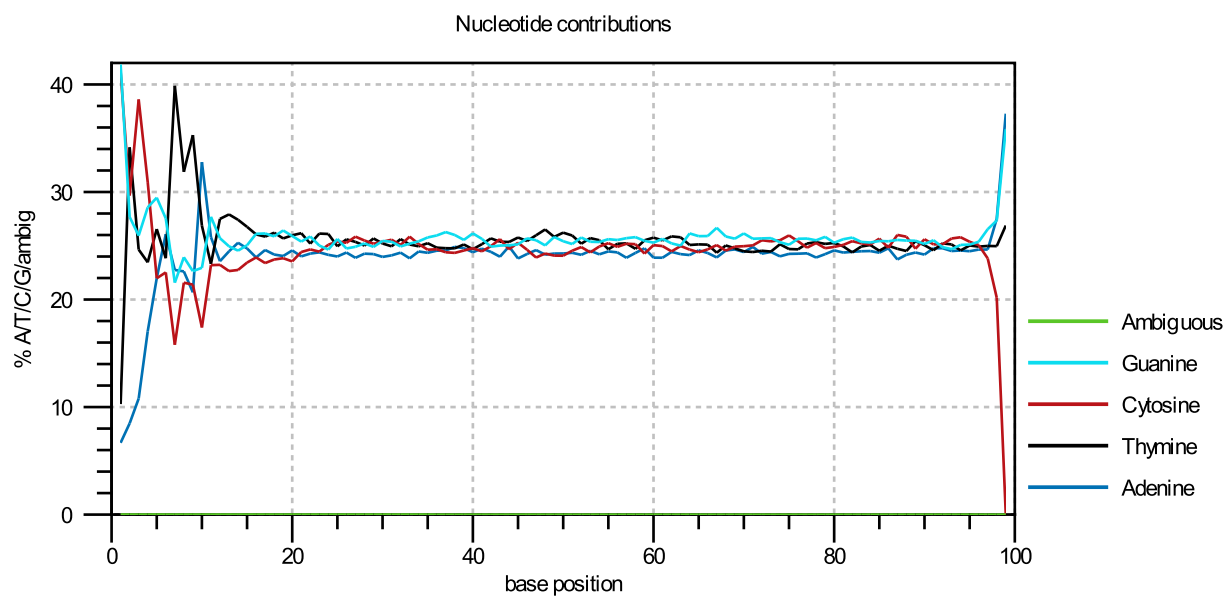

Coverages for the four DNA nucleotides and ambiguous bases.

x: base position

y: number of nucleotides observed per type normalized to the total number of nucleotides observed at that position

### 3.3 GC-content

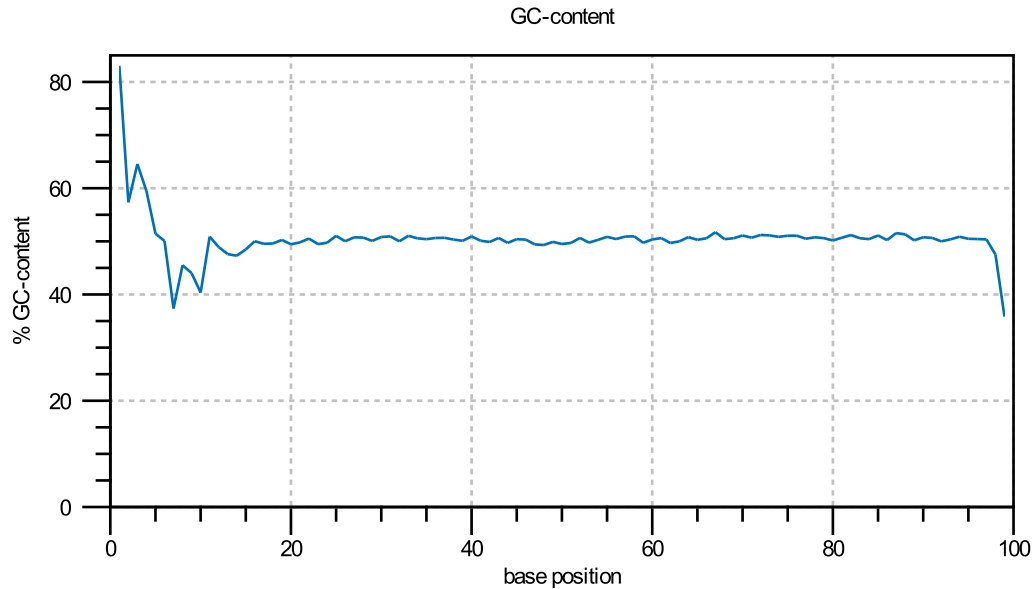

Combined coverage of G- and C-bases.

x: base position

y: number of G- and C-bases observed at current position normalized to the total number of bases observed at that position

### 3.4 Ambiguous base-content

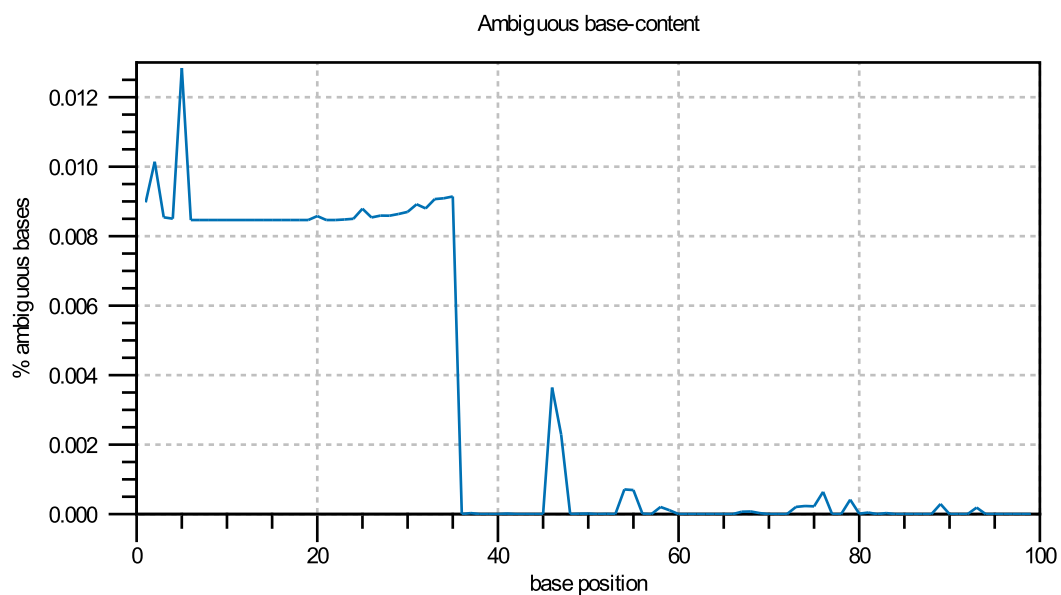

Combined coverage of ambiguous bases.

x: base position

y: number of ambiguous bases observed at current position normalized to the total number of bases observed at that position

### 3.5 Quality distribution

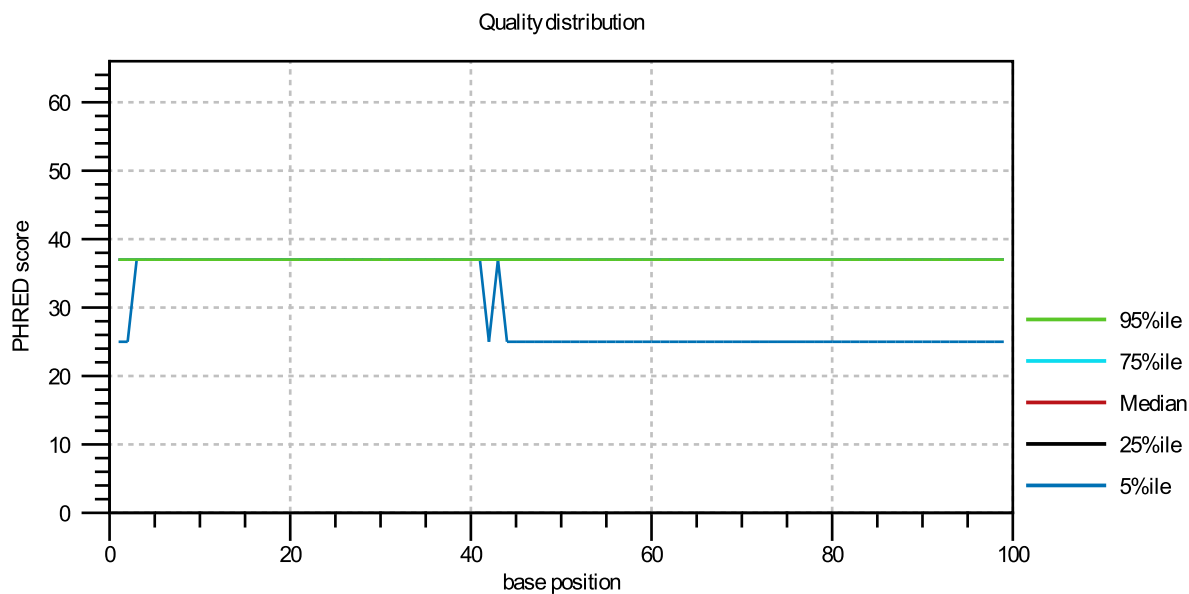

Base-quality distribution along the base positions.

x: base position

y: median & percentiles of quality scores observed at that base position

## 4. Over-representation analyses



## 4.1 Enriched 5-mers

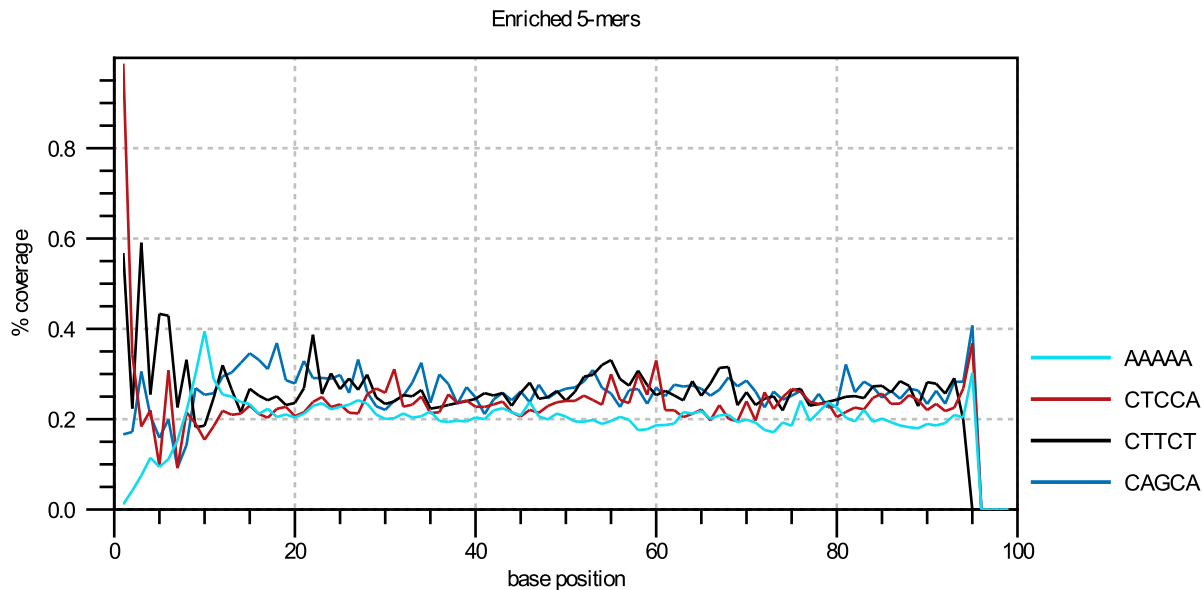

The five most-overrepresented 5-mers. The over-representation of a 5-mer is calculated as the ratio of the observed and expected 5-mer frequency. The expected frequency is calculated as product of the empirical nucleotide probabilities that make up the 5-mer. (5-mers that contain ambiguous bases are ignored)

x: base position

y: number of times a 5-mer has been observed normalized to all 5-mers observed at that position

## 4.2 Sequence duplication levels

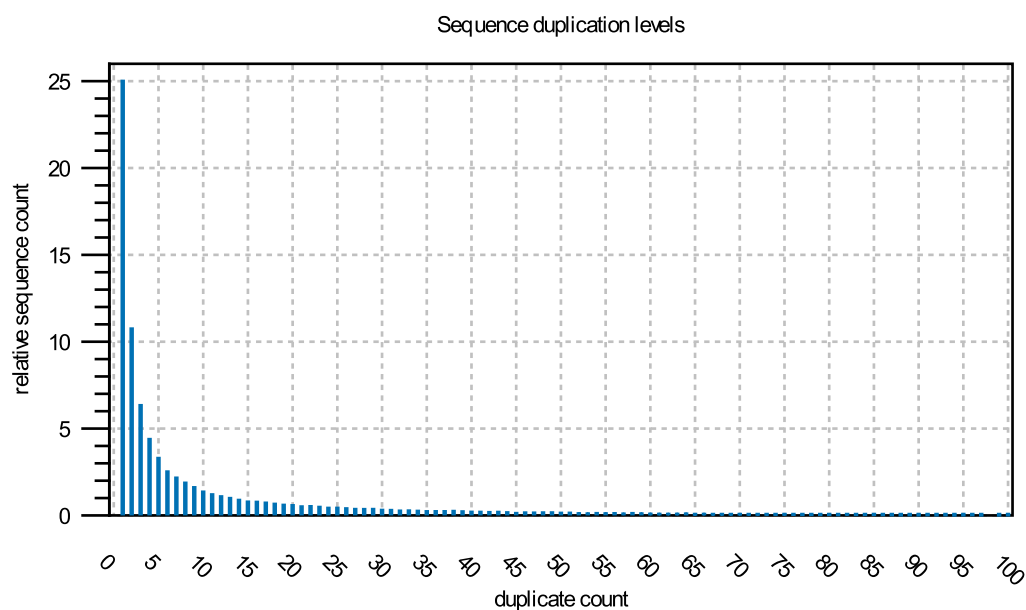

Duplication level distribution. Duplication levels are simply the count of how often a particular sequence has been found.

x: duplicate count

y: number of sequences that have been found that many times normalized to the number of unique sequences

## **4.3 Duplicated sequences**

A table of over-represented sequences is given in the supplementary report

# 1. Summary

|                               |                               |
|-------------------------------|-------------------------------|
| Creation date:                | Fri Dec 23 12:50:25 AEDT 2022 |
| Generated by:                 | 14048742                      |
| Software:                     | CLC Genomics Workbench 22.0   |
| Based upon:                   | 1 data set                    |
| AAV2_S9:                      | 88,511,361 sequences          |
| Total sequences in data set   | 88,511,361 sequences          |
| Total nucleotides in data set | 8,704,068,742 nucleotides     |

# 2. Per-sequence analysis

## 2.1 Lengths distribution

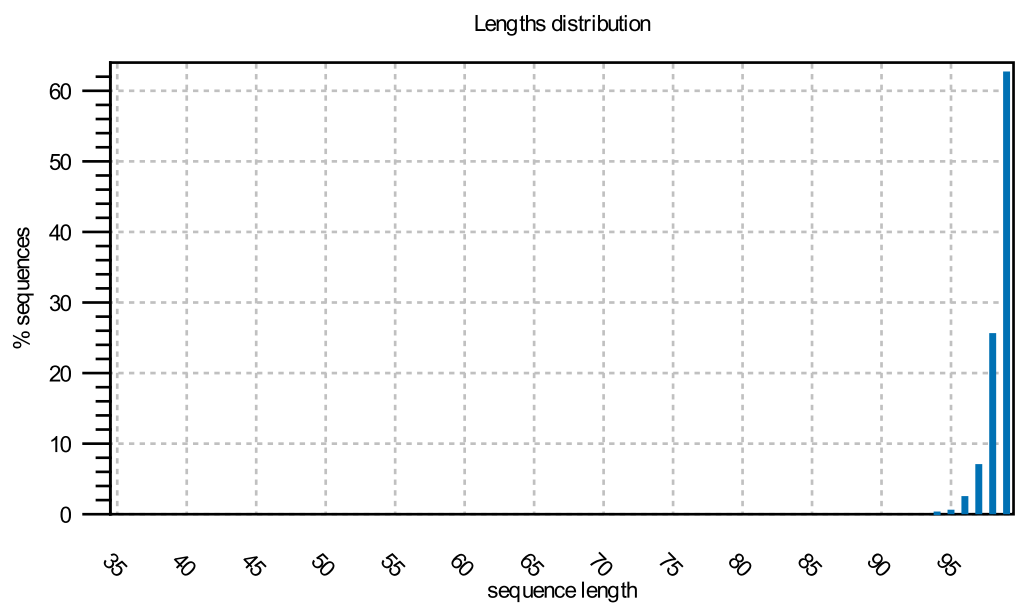

Distribution of sequence lengths. In cases of untrimmed Illumina reads it will just contain a single peak.  
x: sequence length in base-pairs  
y: number of sequences featuring a particular length normalized to the total number of sequences

## 2.2 GC-content

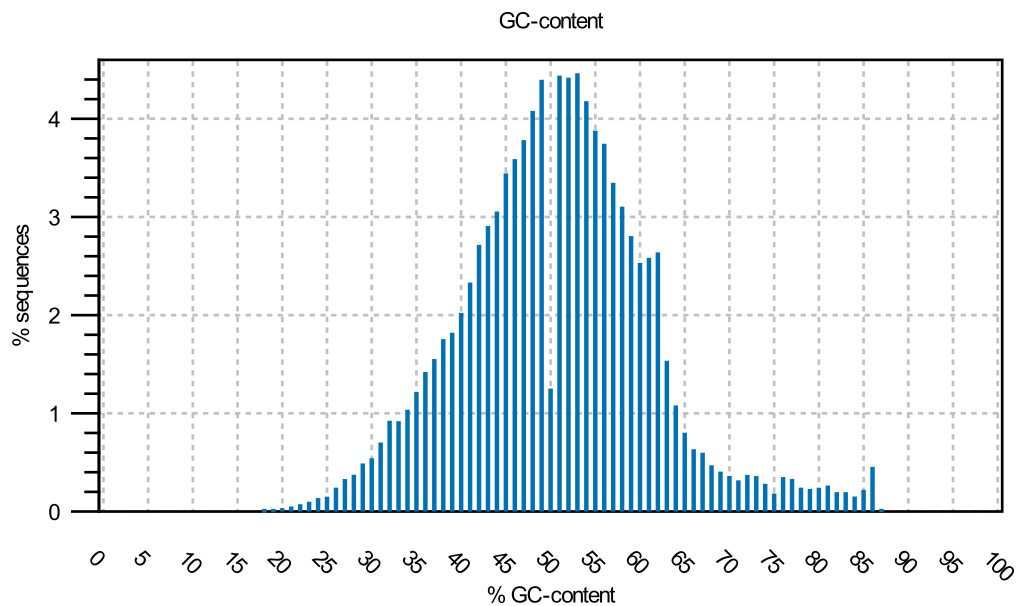

Distribution of GC-contents. The GC-content of a sequence is calculated as the number of GC-bases compared to all bases (including ambiguous bases).

x: relative GC-content of a sequence in percent

y: number of sequences featuring particular GC-percentages normalized to the total number of sequences

## 2.3 Ambiguous base-content

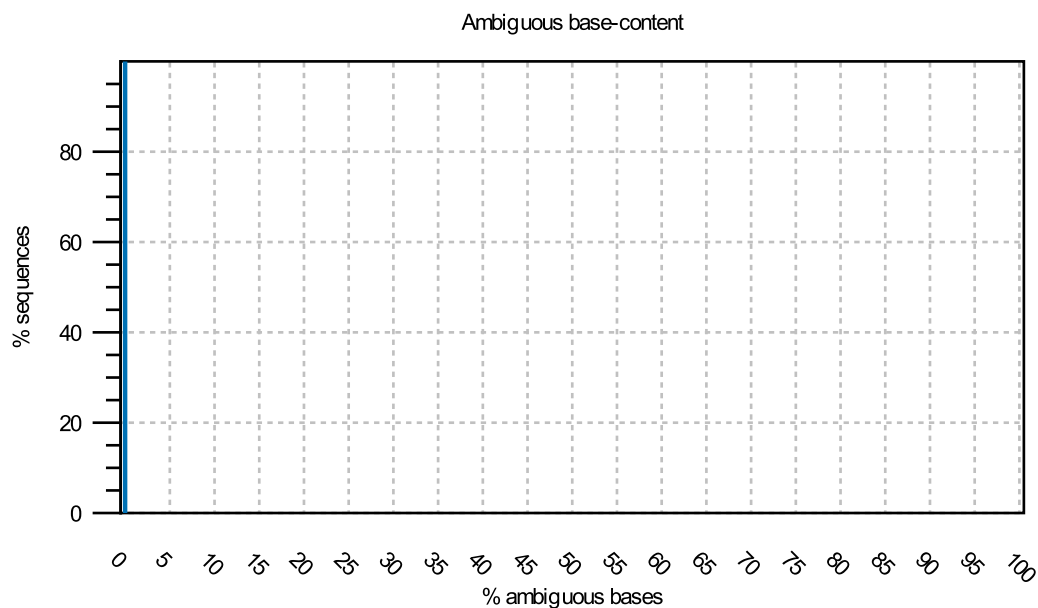

Distribution of N-contents. The N-content of a sequence is calculated as the number of ambiguous bases compared to all bases.

x: relative N-content of a sequence in percent

y: number of sequences featuring particular N-percentages normalized to the total number of sequences

## 2.4 Quality distribution

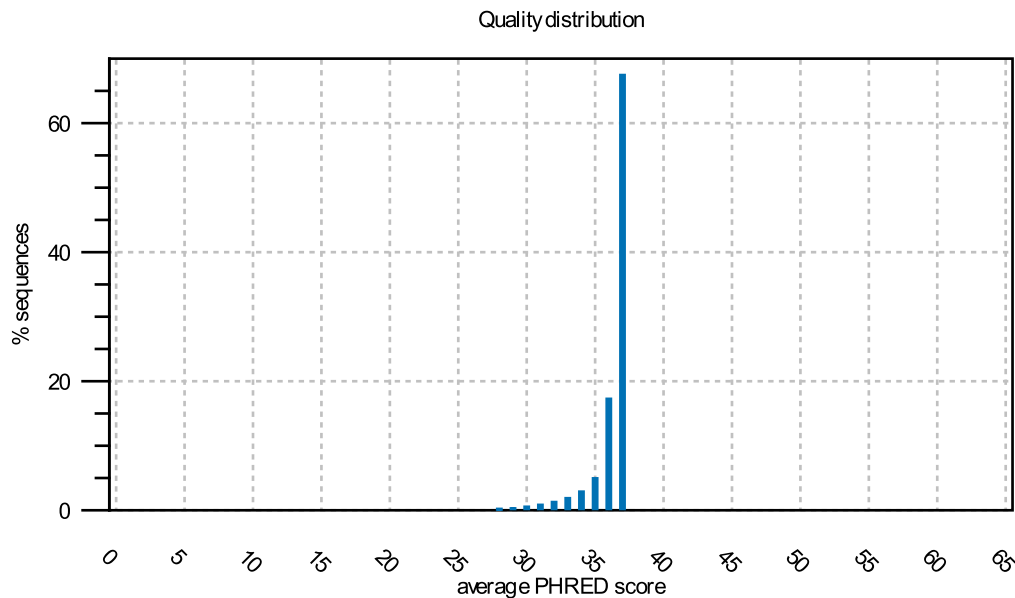

Distribution of average sequence quality scores. The quality of a sequence is calculated as the arithmetic mean of its base qualities.

x: PHRED-score

y: number of sequences observed at that qual. score normalized to the total number of sequences

## 3. Per-base analysis

### 3.1 Coverage

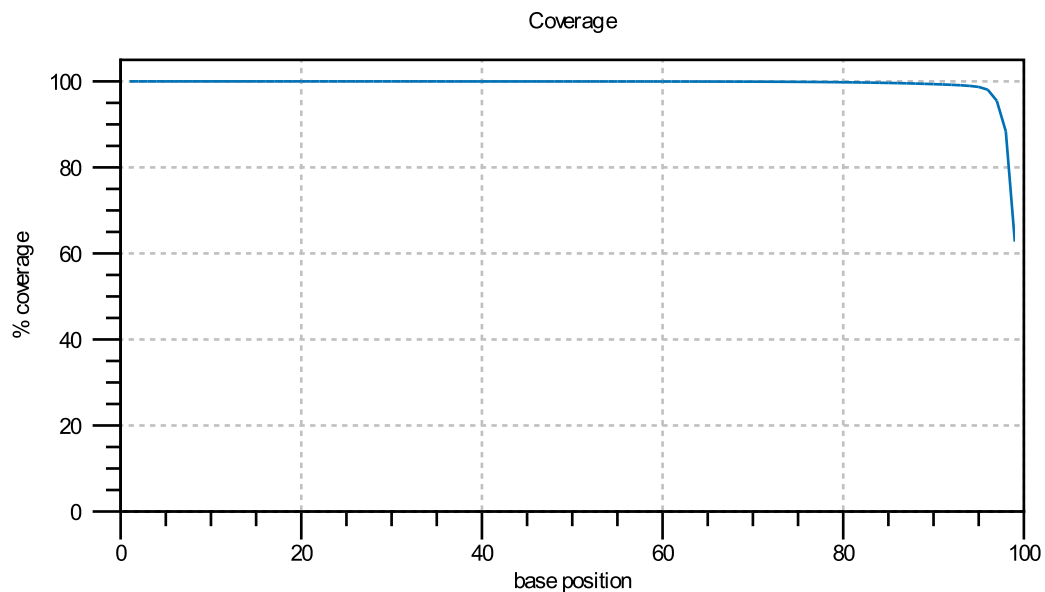

The number of sequences that support (cover) the individual base positions. In cases of untrimmed Illumina reads it will just contain a line.

x: base position

y: number of sequences covering individual base positions normalized to the total number of sequences

### 3.2 Nucleotide contributions

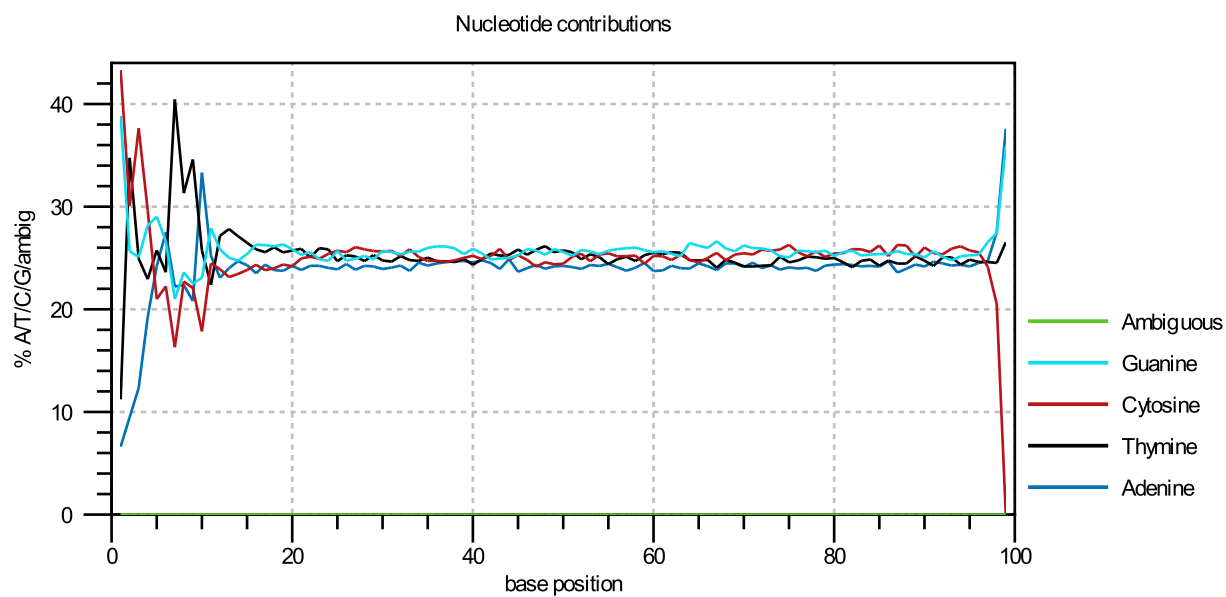

Coverages for the four DNA nucleotides and ambiguous bases.

x: base position

y: number of nucleotides observed per type normalized to the total number of nucleotides observed at that position

### 3.3 GC-content

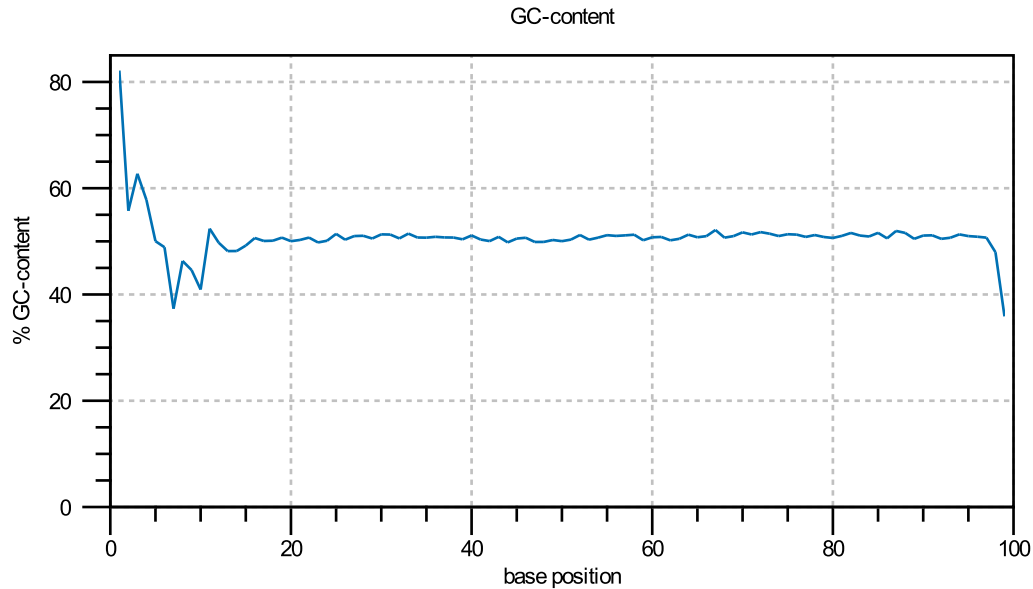

Combined coverage of G- and C-bases.

x: base position

y: number of G- and C-bases observed at current position normalized to the total number of bases observed at that position

### 3.4 Ambiguous base-content

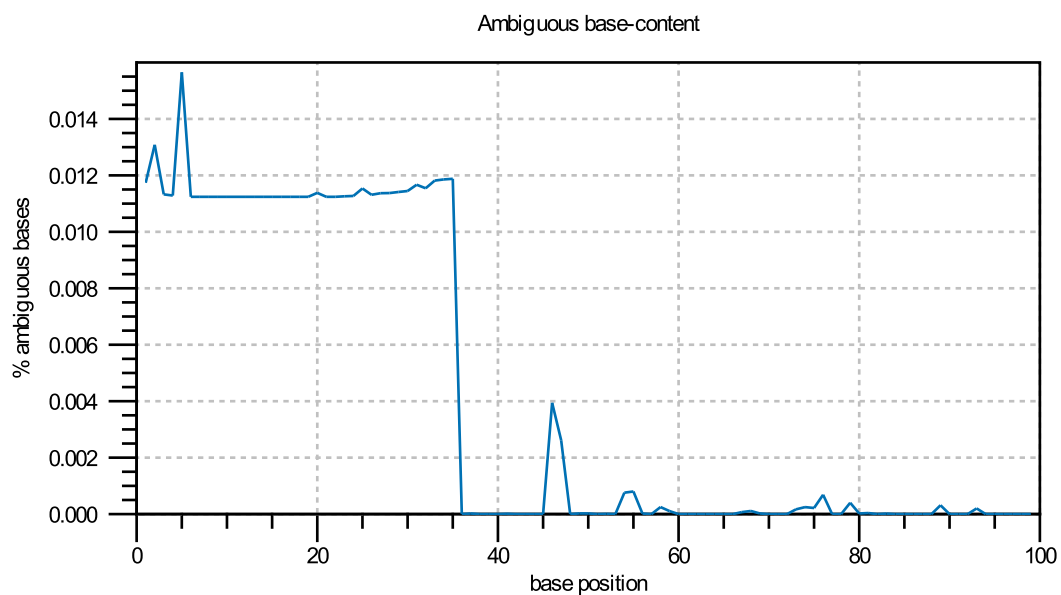

Combined coverage of ambiguous bases.

x: base position

y: number of ambiguous bases observed at current position normalized to the total number of bases observed at that position

### 3.5 Quality distribution

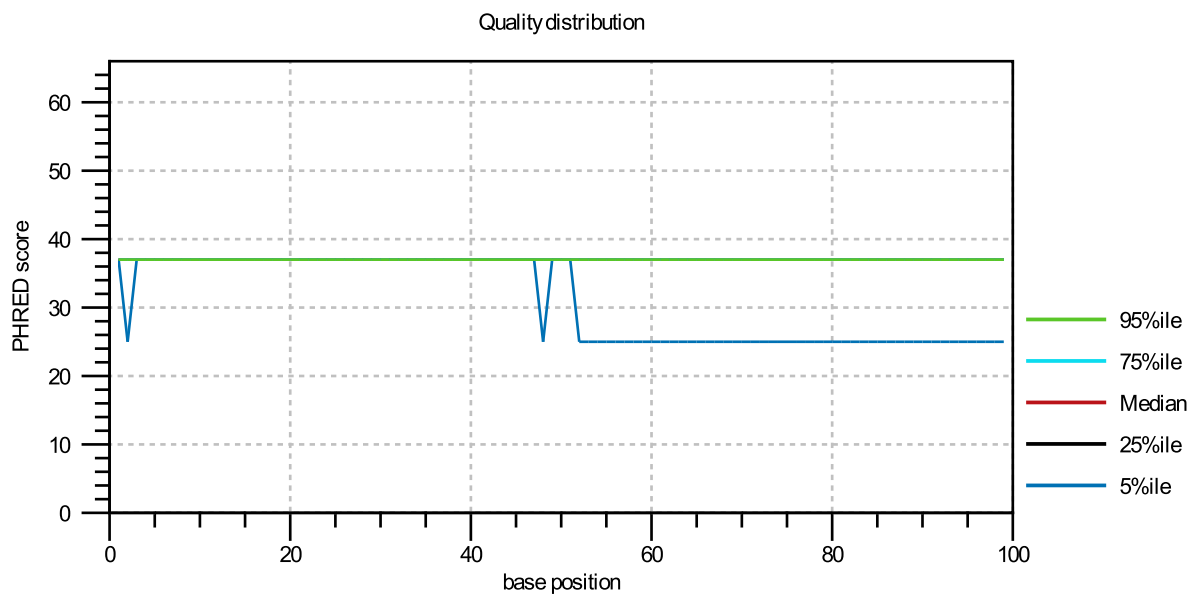

Base-quality distribution along the base positions.

x: base position

y: median & percentiles of quality scores observed at that base position

## 4. Over-representation analyses



## 4.1 Enriched 5-mers

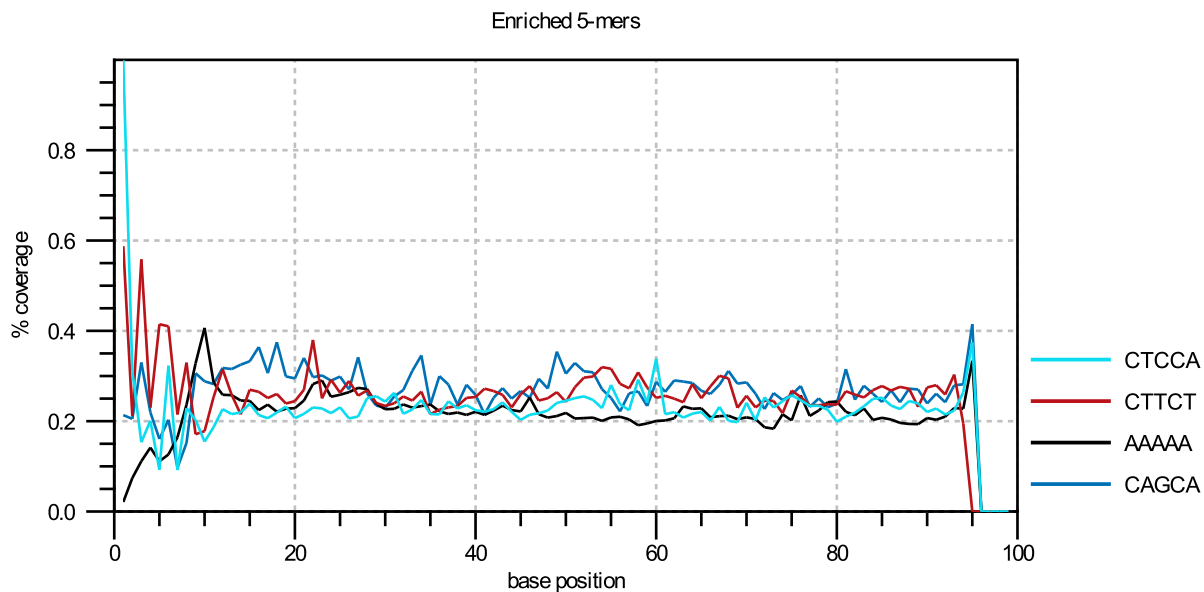

The five most-overrepresented 5-mers. The over-representation of a 5-mer is calculated as the ratio of the observed and expected 5-mer frequency. The expected frequency is calculated as product of the empirical nucleotide probabilities that make up the 5-mer. (5-mers that contain ambiguous bases are ignored)

x: base position

y: number of times a 5-mer has been observed normalized to all 5-mers observed at that position

## 4.2 Sequence duplication levels

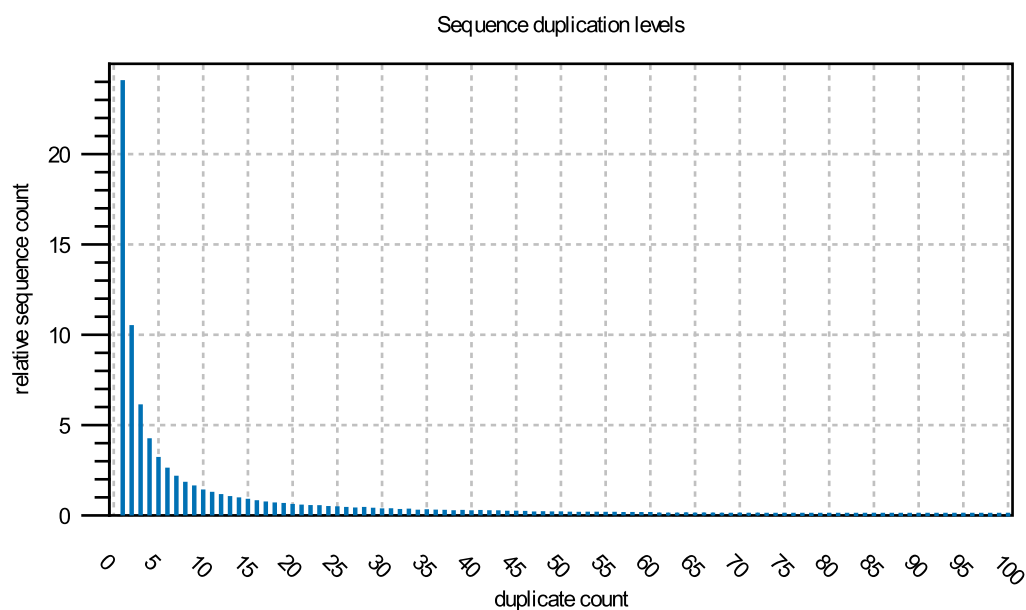

Duplication level distribution. Duplication levels are simply the count of how often a particular sequence has been found.

x: duplicate count

y: number of sequences that have been found that many times normalized to the number of unique sequences

## **4.3 Duplicated sequences**

A table of over-represented sequences is given in the supplementary report

# 1. Summary

|                               |                               |
|-------------------------------|-------------------------------|
| Creation date:                | Fri Dec 23 13:16:47 AEDT 2022 |
| Generated by:                 | 14048742                      |
| Software:                     | CLC Genomics Workbench 22.0   |
| Based upon:                   | 1 data set                    |
| AAV3_S6:                      | 97,585,420 sequences          |
| Total sequences in data set   | 97,585,420 sequences          |
| Total nucleotides in data set | 9,590,915,338 nucleotides     |

## 2. Per-sequence analysis

### 2.1 Lengths distribution

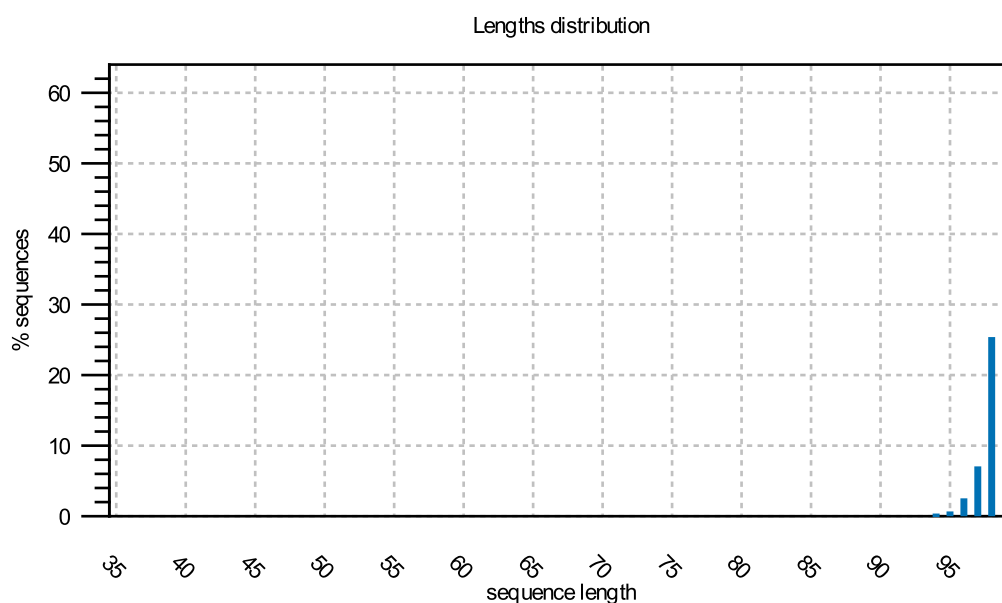

Distribution of sequence lengths. In cases of untrimmed Illumina reads it will just contain a single peak.

x: sequence length in base-pairs

y: number of sequences featuring a particular length normalized to the total number of sequences

## 2.2 GC-content

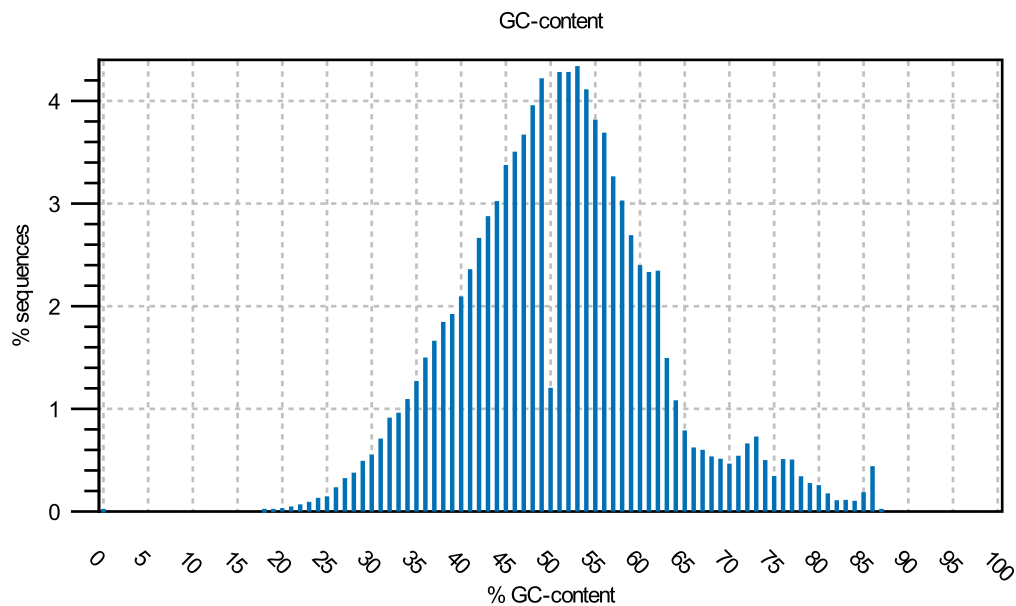

Distribution of GC-contents. The GC-content of a sequence is calculated as the number of GC-bases compared to all bases (including ambiguous bases).

x: relative GC-content of a sequence in percent

y: number of sequences featuring particular GC-percentages normalized to the total number of sequences

## 2.3 Ambiguous base-content

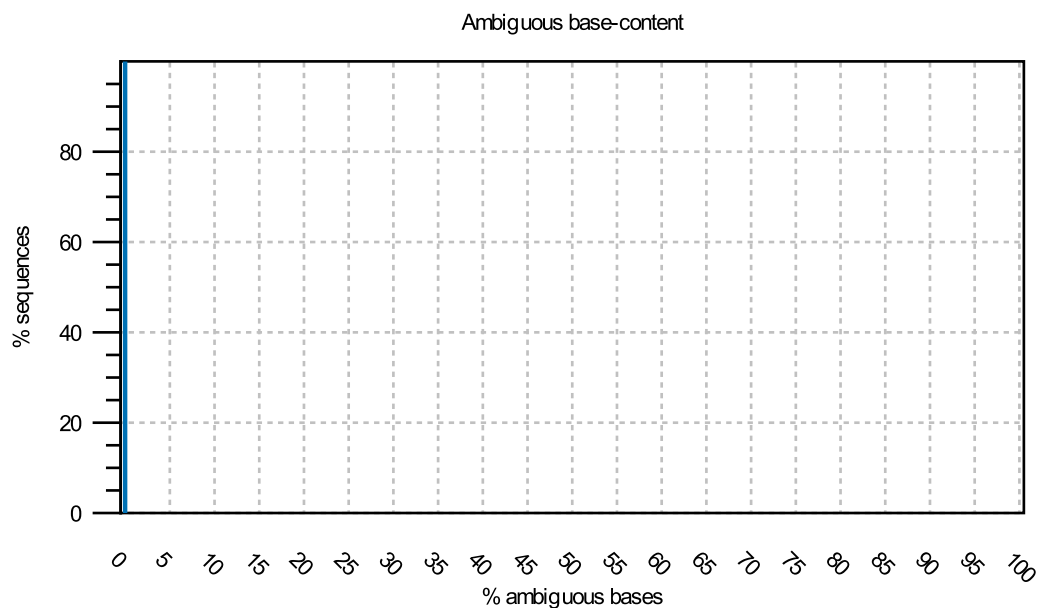

Distribution of N-contents. The N-content of a sequence is calculated as the number of ambiguous bases compared to all bases.

x: relative N-content of a sequence in percent

y: number of sequences featuring particular N-percentages normalized to the total number of sequences

## 2.4 Quality distribution

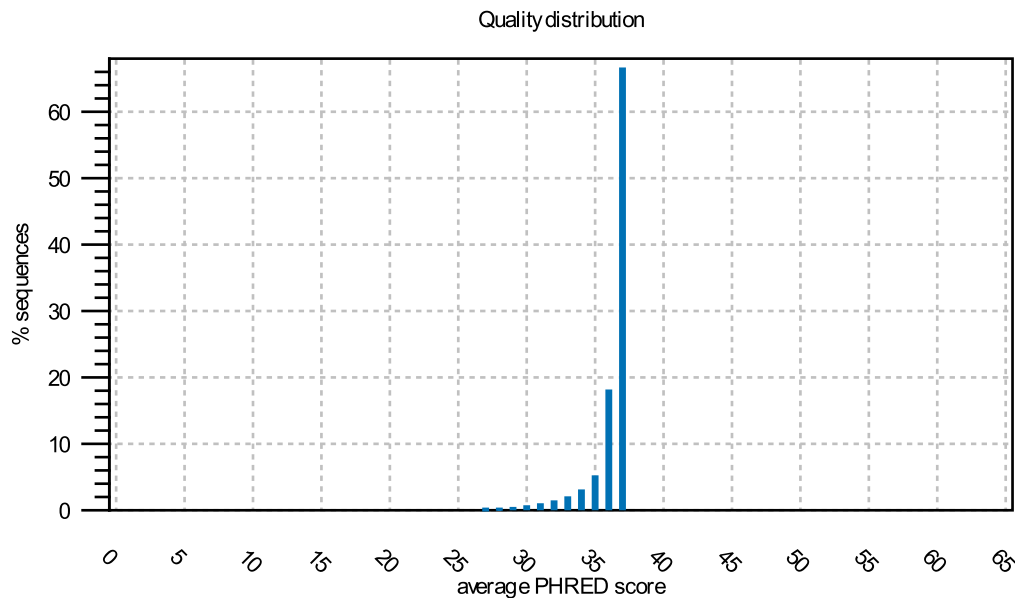

Distribution of average sequence quality scores. The quality of a sequence is calculated as the arithmetic mean of its base qualities.

x: PHRED-score

y: number of sequences observed at that qual. score normalized to the total number of sequences

## 3. Per-base analysis

### 3.1 Coverage

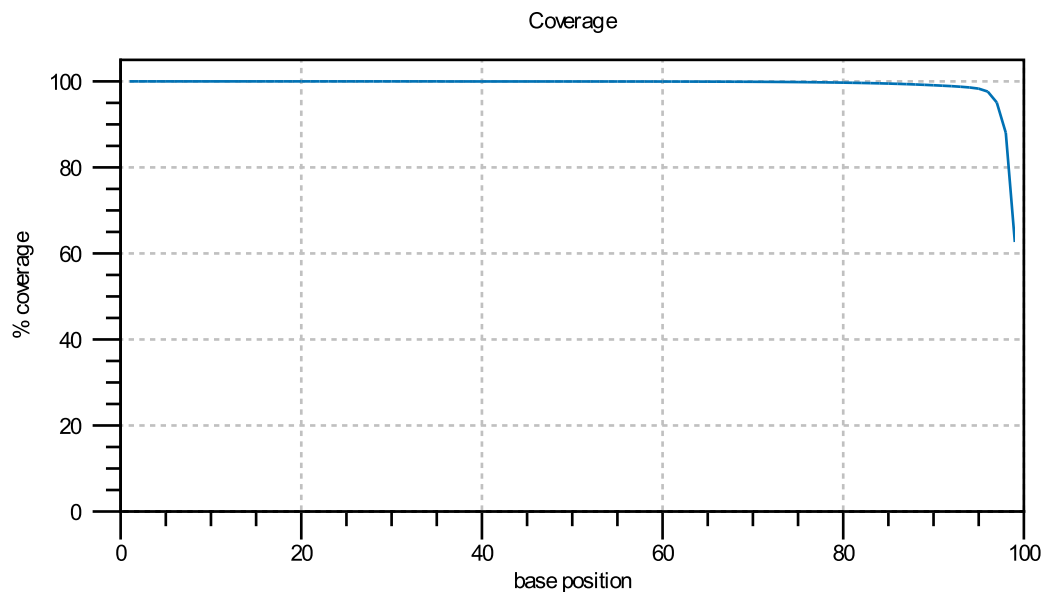

The number of sequences that support (cover) the individual base positions. In cases of untrimmed Illumina reads it will just contain a line.

x: base position

y: number of sequences covering individual base positions normalized to the total number of sequences

### 3.2 Nucleotide contributions

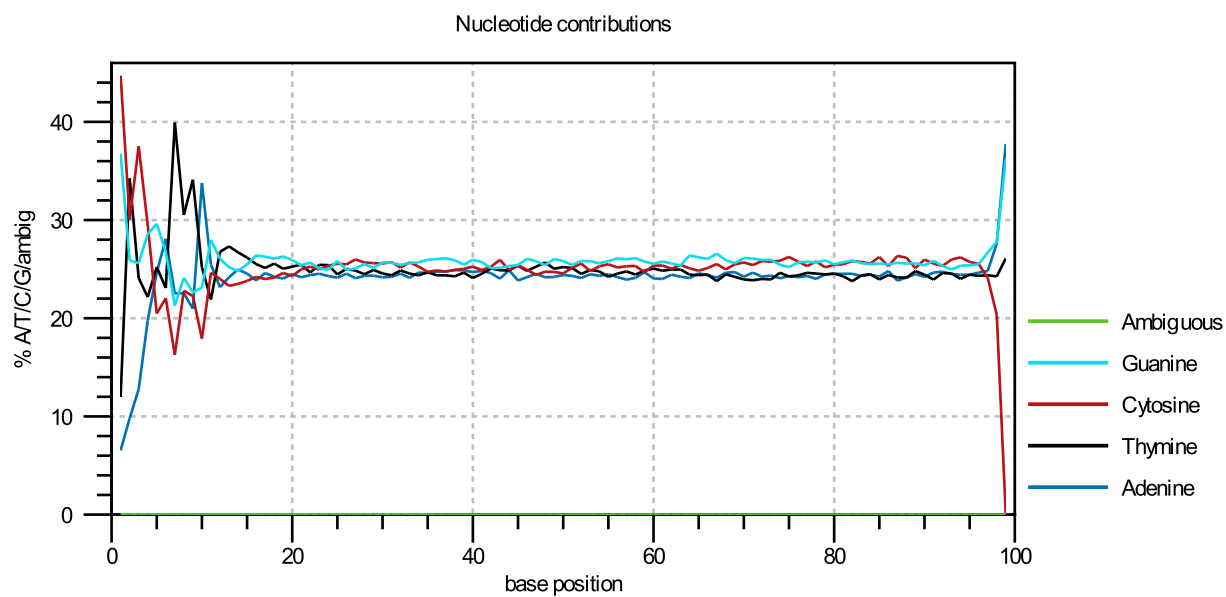

Coverages for the four DNA nucleotides and ambiguous bases.

x: base position

y: number of nucleotides observed per type normalized to the total number of nucleotides observed at that position

### 3.3 GC-content

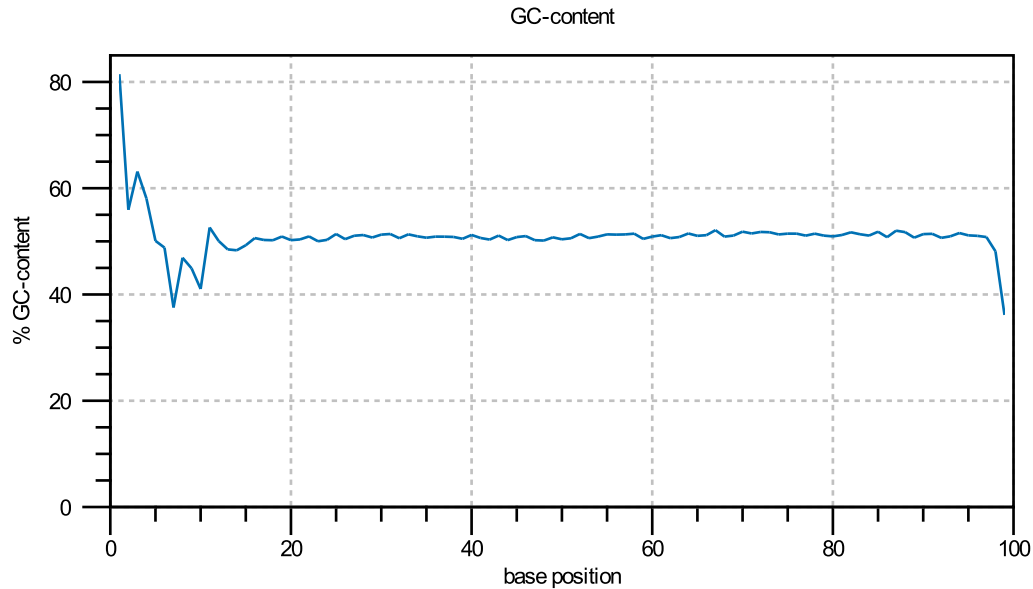

Combined coverage of G- and C-bases.

x: base position

y: number of G- and C-bases observed at current position normalized to the total number of bases observed at that position

### 3.4 Ambiguous base-content

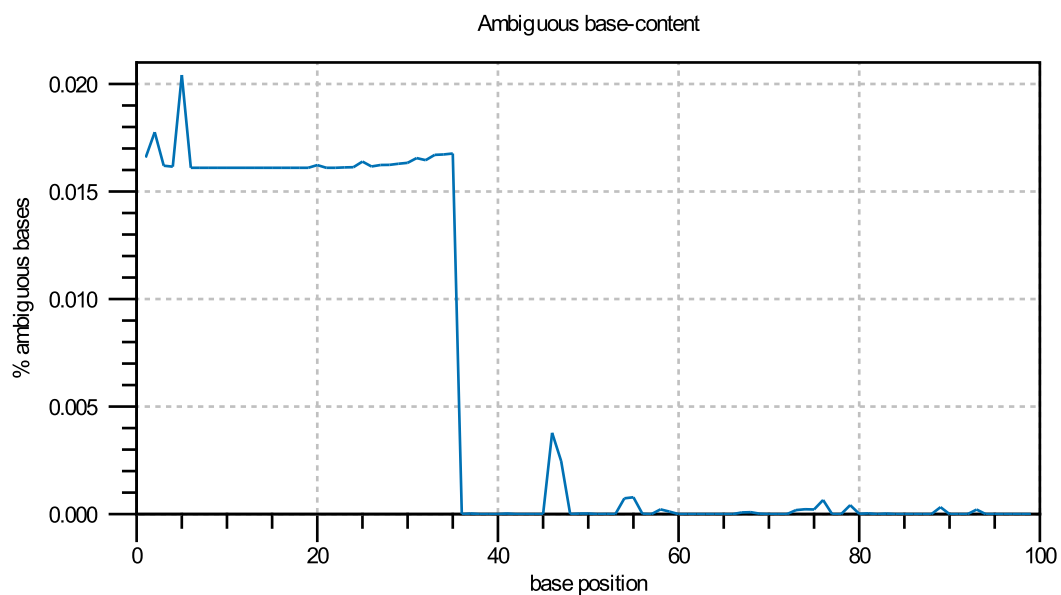

Combined coverage of ambiguous bases.

x: base position

y: number of ambiguous bases observed at current position normalized to the total number of bases observed at that position

### 3.5 Quality distribution

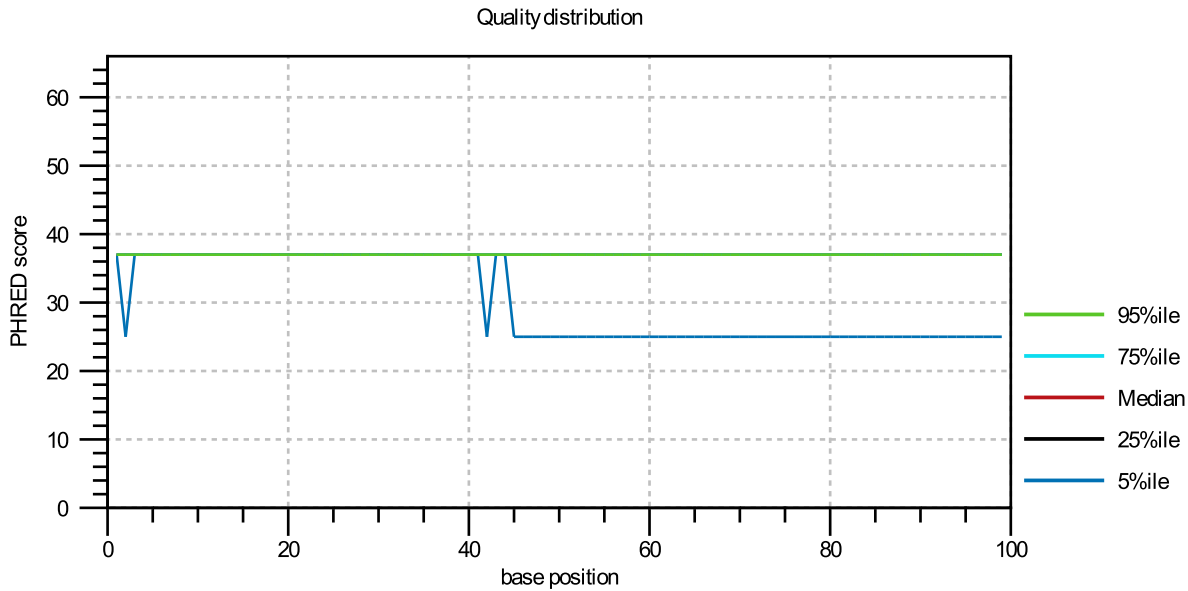

Base-quality distribution along the base positions.

x: base position

y: median & percentiles of quality scores observed at that base position

## 4. Over-representation analyses



## 4.1 Enriched 5-mers

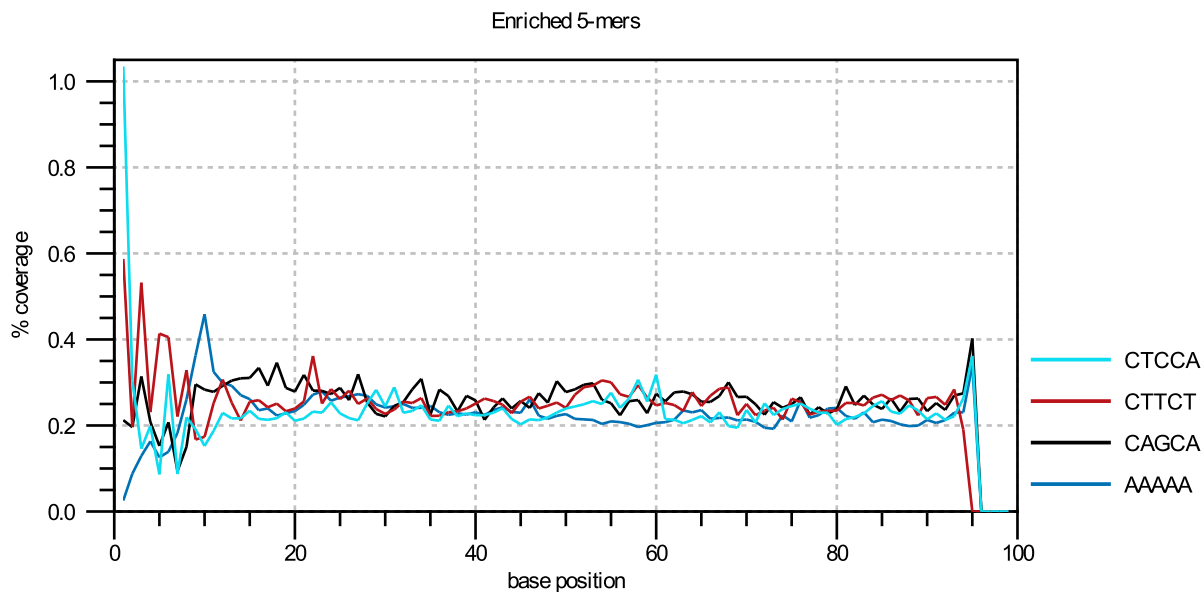

The five most-overrepresented 5-mers. The over-representation of a 5-mer is calculated as the ratio of the observed and expected 5-mer frequency. The expected frequency is calculated as product of the empirical nucleotide probabilities that make up the 5-mer. (5-mers that contain ambiguous bases are ignored)

x: base position

y: number of times a 5-mer has been observed normalized to all 5-mers observed at that position

## 4.2 Sequence duplication levels

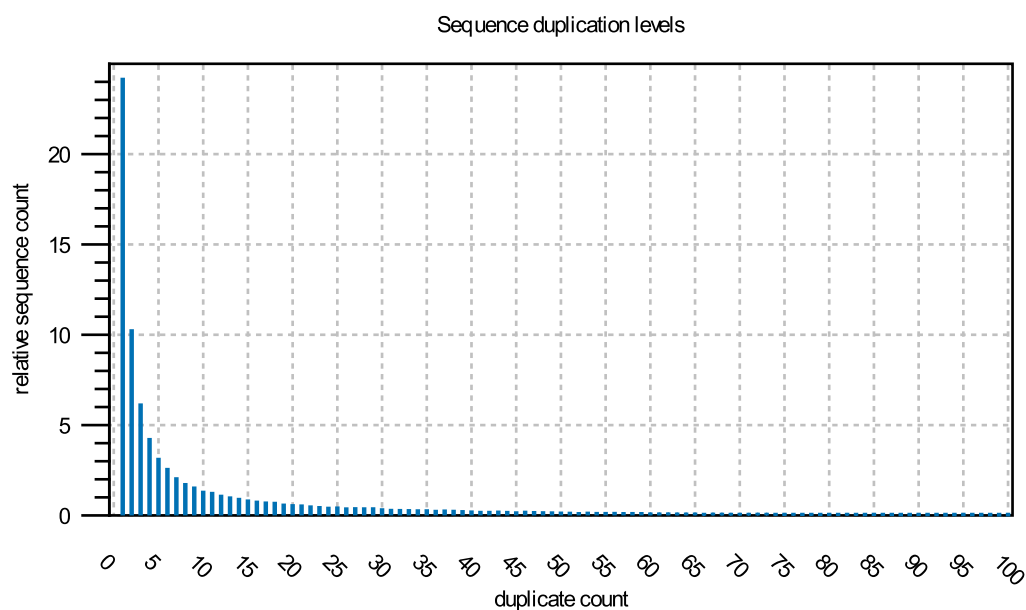

Duplication level distribution. Duplication levels are simply the count of how often a particular sequence has been found.

x: duplicate count

y: number of sequences that have been found that many times normalized to the number of unique sequences

## **4.3 Duplicated sequences**

A table of over-represented sequences is given in the supplementary report

# 1. Summary

|                               |                               |
|-------------------------------|-------------------------------|
| Creation date:                | Fri Dec 23 15:38:26 AEDT 2022 |
| Generated by:                 | 14048742                      |
| Software:                     | CLC Genomics Workbench 22.0   |
| Based upon:                   | 1 data set                    |
| PB1_S5:                       | 68,966,610 sequences          |
| Total sequences in data set   | 68,966,610 sequences          |
| Total nucleotides in data set | 6,780,920,530 nucleotides     |

# 2. Per-sequence analysis

## 2.1 Lengths distribution

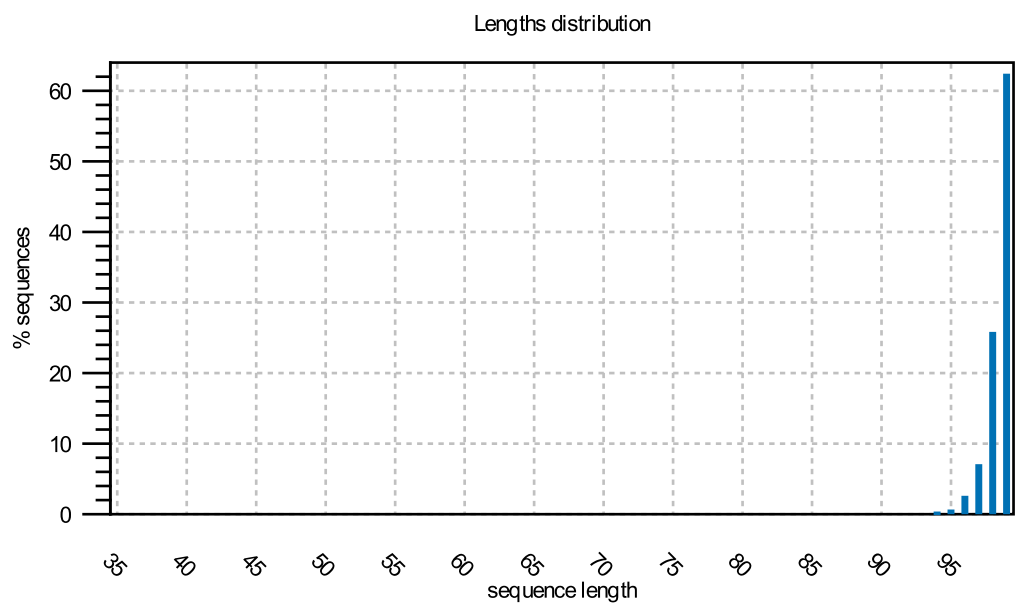

Distribution of sequence lengths. In cases of untrimmed Illumina reads it will just contain a single peak.  
x: sequence length in base-pairs  
y: number of sequences featuring a particular length normalized to the total number of sequences

## 2.2 GC-content

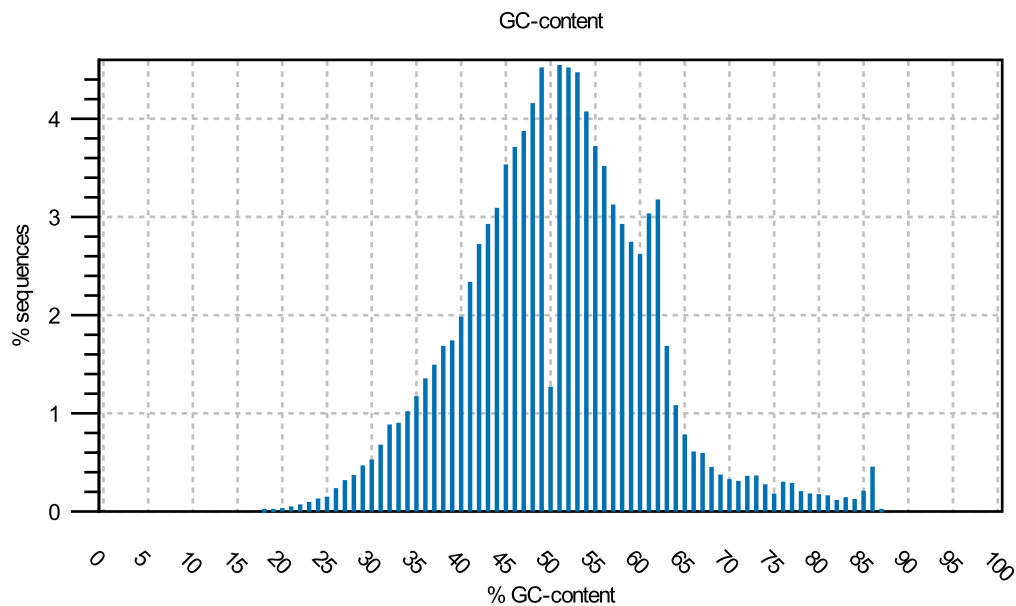

Distribution of GC-contents. The GC-content of a sequence is calculated as the number of GC-bases compared to all bases (including ambiguous bases).

x: relative GC-content of a sequence in percent

y: number of sequences featuring particular GC-percentages normalized to the total number of sequences

## 2.3 Ambiguous base-content

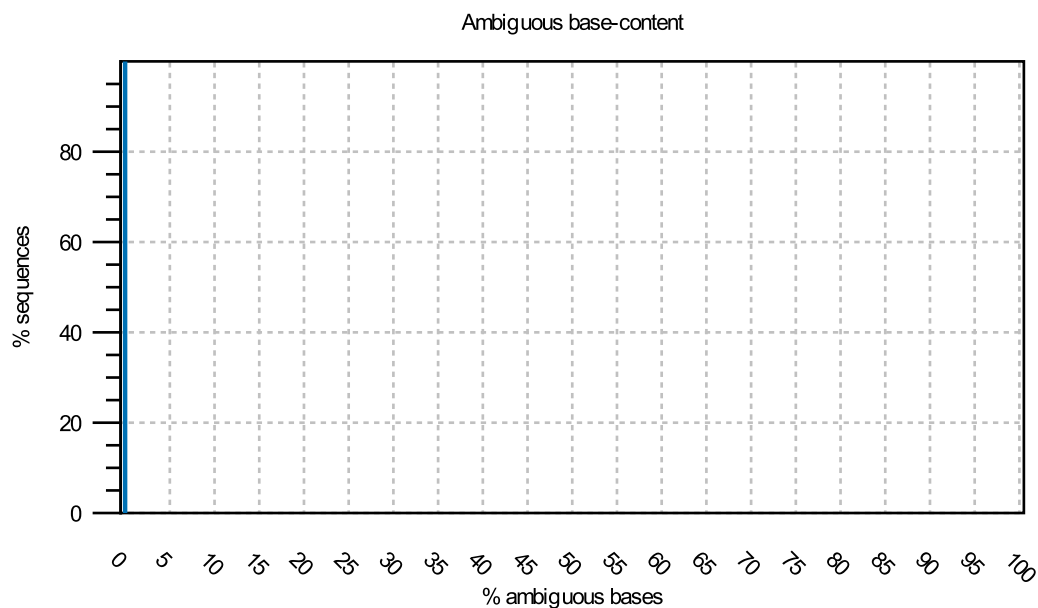

Distribution of N-contents. The N-content of a sequence is calculated as the number of ambiguous bases compared to all bases.

x: relative N-content of a sequence in percent

y: number of sequences featuring particular N-percentages normalized to the total number of sequences

## 2.4 Quality distribution

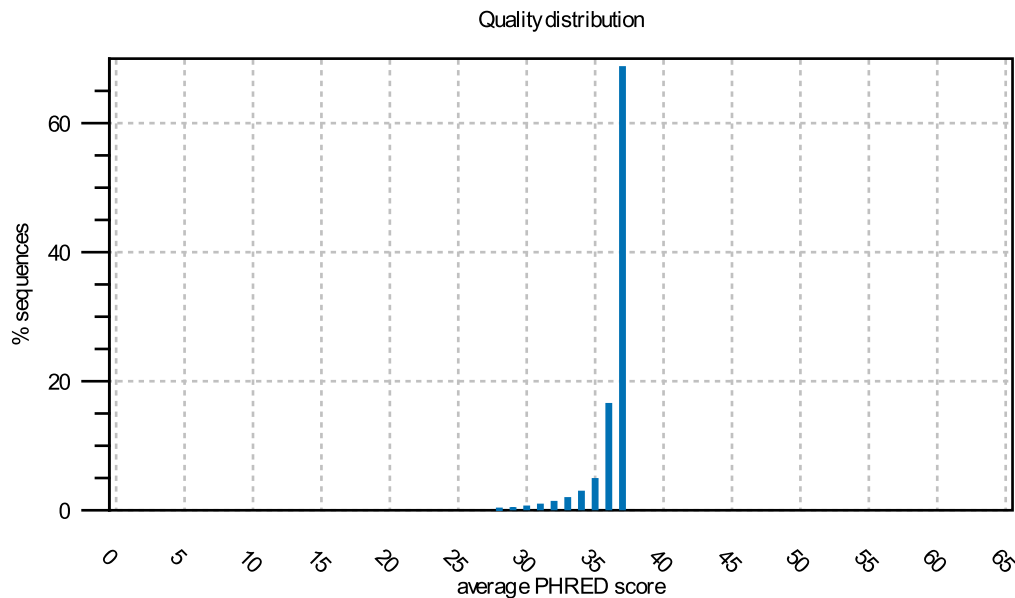

Distribution of average sequence quality scores. The quality of a sequence is calculated as the arithmetic mean of its base qualities.

x: PHRED-score

y: number of sequences observed at that qual. score normalized to the total number of sequences

## 3. Per-base analysis

## 3.1 Coverage

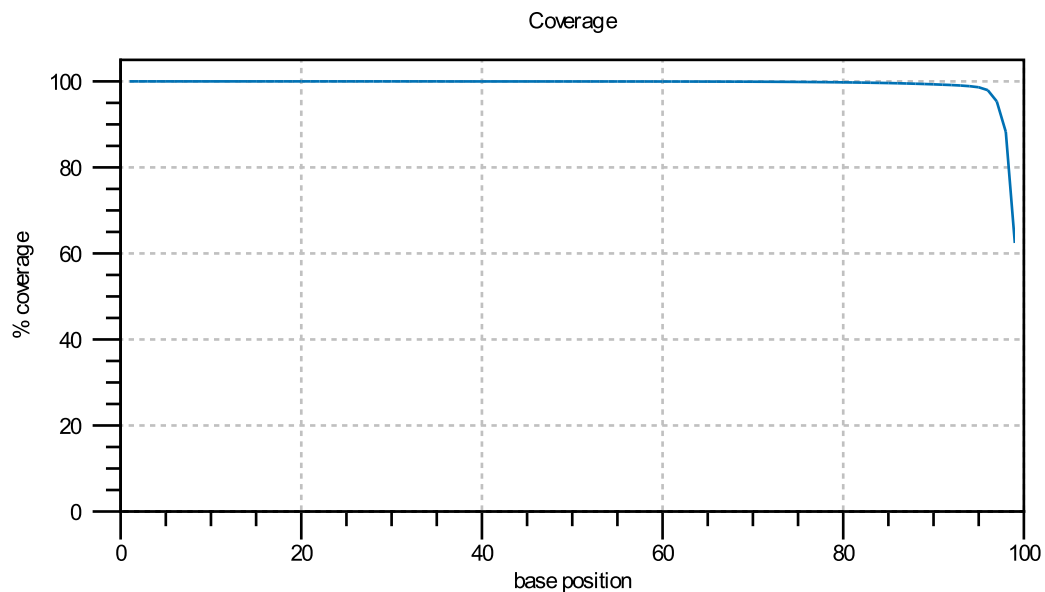

The number of sequences that support (cover) the individual base positions. In cases of untrimmed Illumina reads it will just contain a line.

x: base position

y: number of sequences covering individual base positions normalized to the total number of sequences

## 3.2 Nucleotide contributions

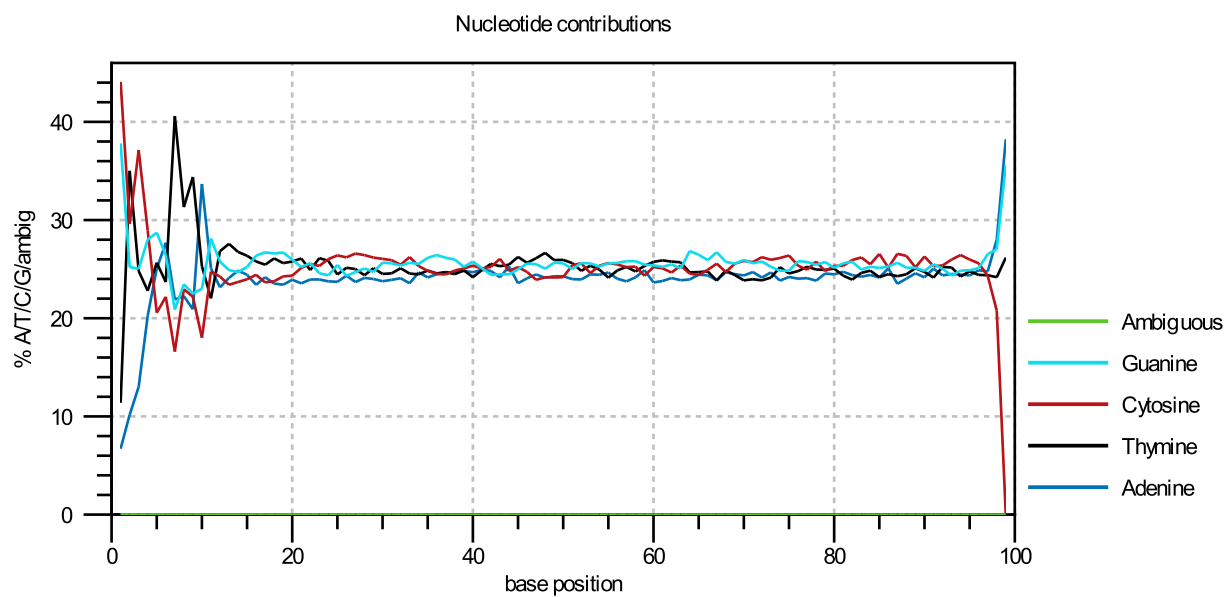

Coverages for the four DNA nucleotides and ambiguous bases.

x: base position

y: number of nucleotides observed per type normalized to the total number of nucleotides observed at that position

### 3.3 GC-content

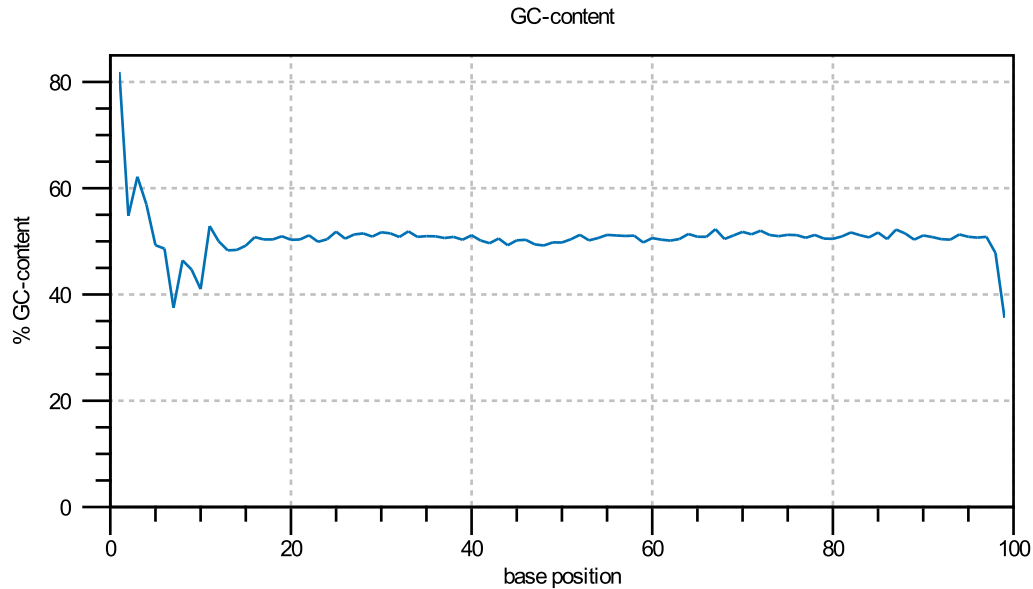

Combined coverage of G- and C-bases.

x: base position

y: number of G- and C-bases observed at current position normalized to the total number of bases observed at that position

### 3.4 Ambiguous base-content

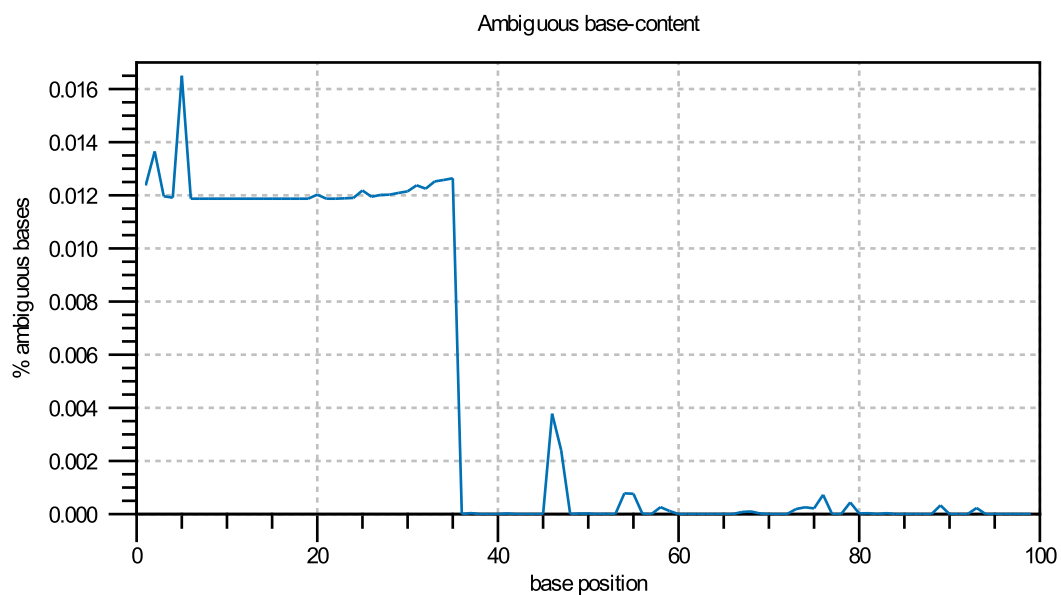

Combined coverage of ambiguous bases.

x: base position

y: number of ambiguous bases observed at current position normalized to the total number of bases observed at that position

### 3.5 Quality distribution

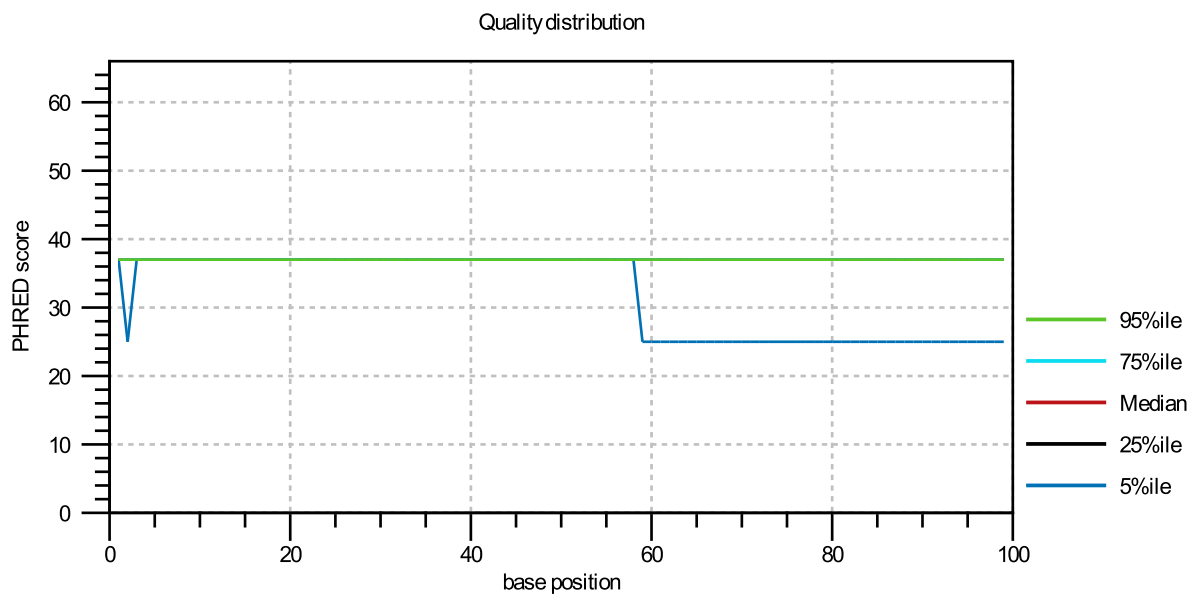

Base-quality distribution along the base positions.

x: base position

y: median & percentiles of quality scores observed at that base position

## 4. Over-representation analyses



## 4.1 Enriched 5-mers

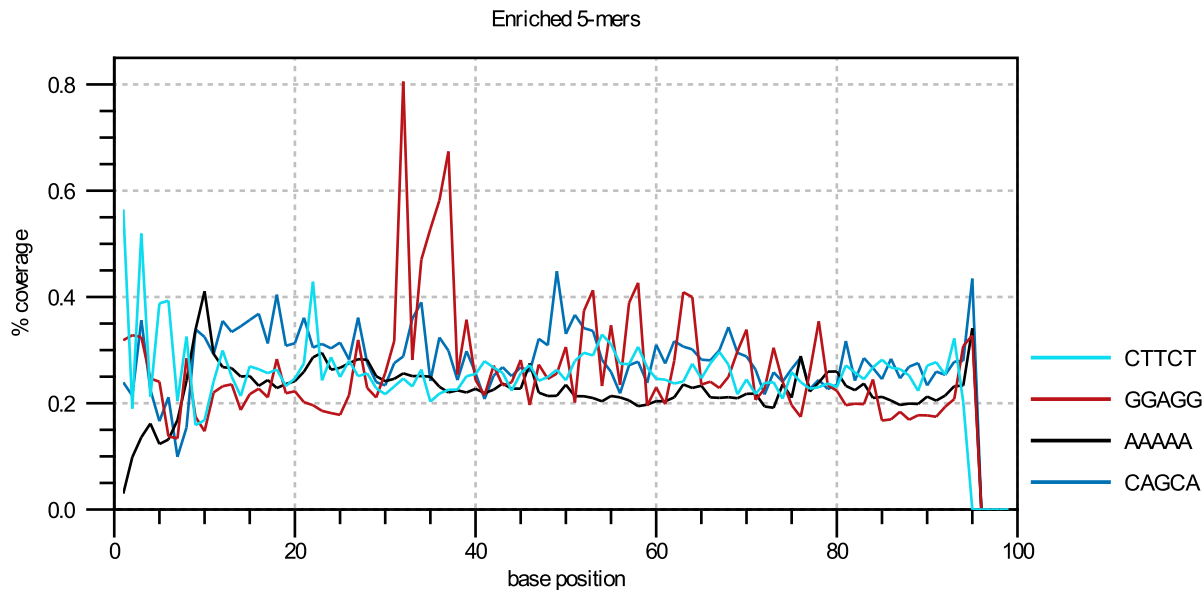

The five most-overrepresented 5-mers. The over-representation of a 5-mer is calculated as the ratio of the observed and expected 5-mer frequency. The expected frequency is calculated as product of the empirical nucleotide probabilities that make up the 5-mer. (5-mers that contain ambiguous bases are ignored)

x: base position

y: number of times a 5-mer has been observed normalized to all 5-mers observed at that position

## 4.2 Sequence duplication levels

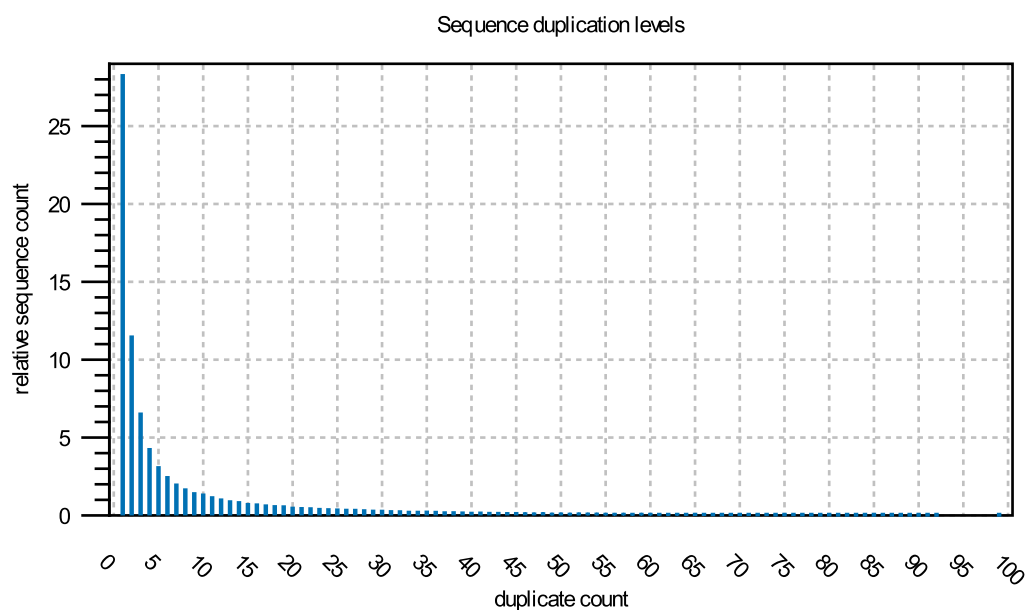

Duplication level distribution. Duplication levels are simply the count of how often a particular sequence has been found.

x: duplicate count

y: number of sequences that have been found that many times normalized to the number of unique sequences

## **4.3 Duplicated sequences**

A table of over-represented sequences is given in the supplementary report

# 1. Summary

|                               |                               |
|-------------------------------|-------------------------------|
| Creation date:                | Fri Dec 23 15:58:28 AEDT 2022 |
| Generated by:                 | 14048742                      |
| Software:                     | CLC Genomics Workbench 22.0   |
| Based upon:                   | 1 data set                    |
| PB2_S10:                      | 67,920,378 sequences          |
| Total sequences in data set   | 67,920,378 sequences          |
| Total nucleotides in data set | 6,678,602,531 nucleotides     |

# 2. Per-sequence analysis

## 2.1 Lengths distribution

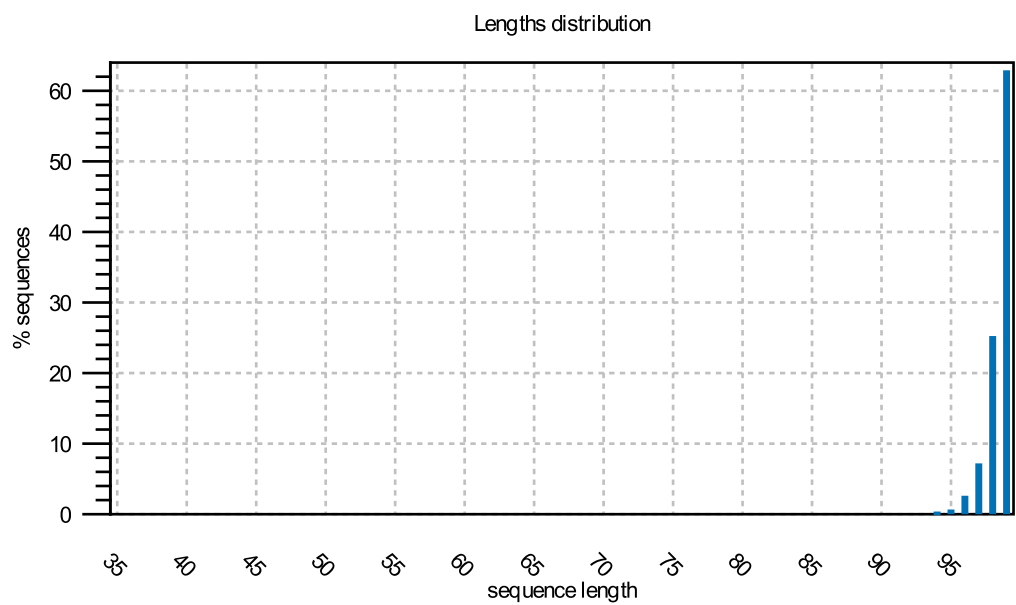

Distribution of sequence lengths. In cases of untrimmed Illumina reads it will just contain a single peak.  
x: sequence length in base-pairs  
y: number of sequences featuring a particular length normalized to the total number of sequences

## 2.2 GC-content

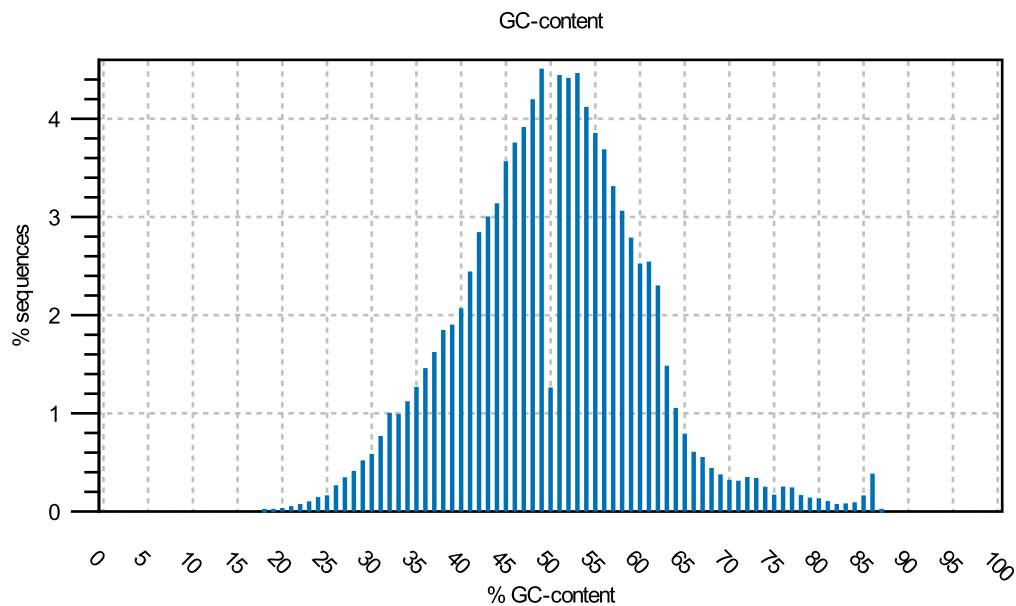

Distribution of GC-contents. The GC-content of a sequence is calculated as the number of GC-bases compared to all bases (including ambiguous bases).

x: relative GC-content of a sequence in percent

y: number of sequences featuring particular GC-percentages normalized to the total number of sequences

## 2.3 Ambiguous base-content



Distribution of N-contents. The N-content of a sequence is calculated as the number of ambiguous bases compared to all bases.

x: relative N-content of a sequence in percent

y: number of sequences featuring particular N-percentages normalized to the total number of sequences

## 2.4 Quality distribution

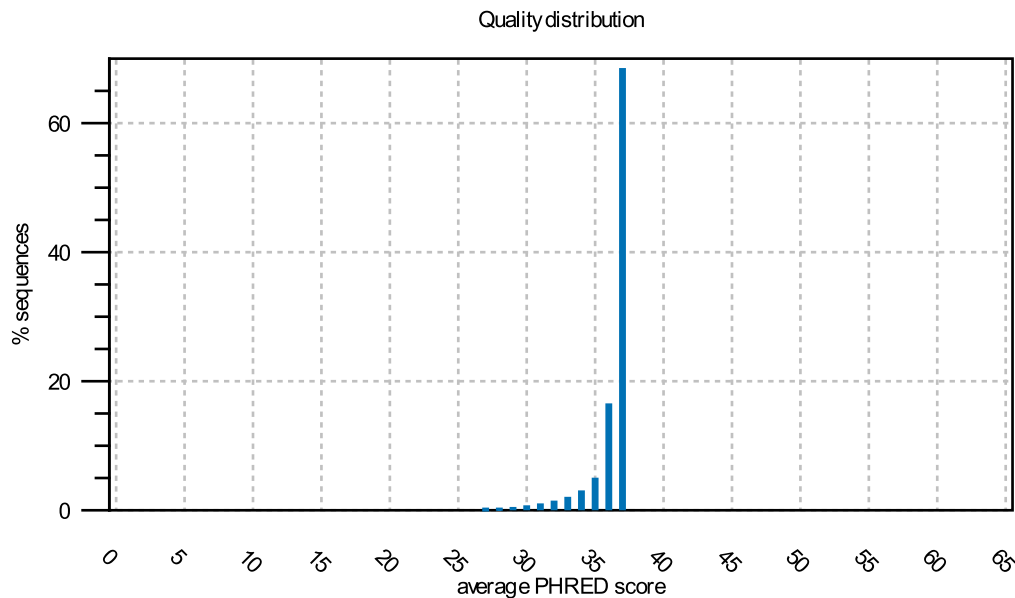

Distribution of average sequence quality scores. The quality of a sequence is calculated as the arithmetic mean of its base qualities.

x: PHRED-score

y: number of sequences observed at that qual. score normalized to the total number of sequences

## 3. Per-base analysis

### 3.1 Coverage

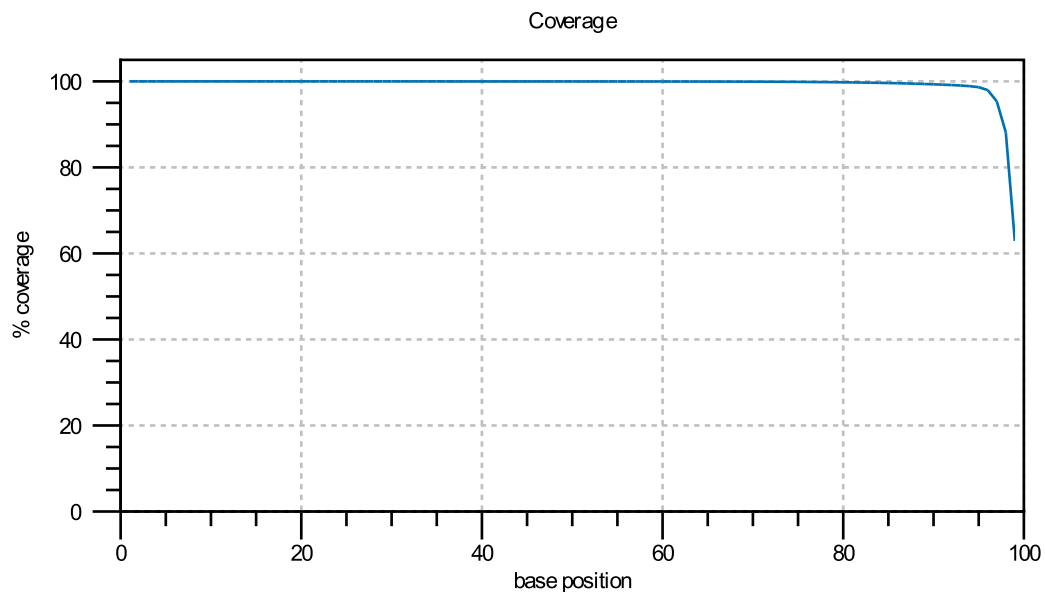

The number of sequences that support (cover) the individual base positions. In cases of untrimmed Illumina reads it will just contain a line.

x: base position

y: number of sequences covering individual base positions normalized to the total number of sequences

### 3.2 Nucleotide contributions

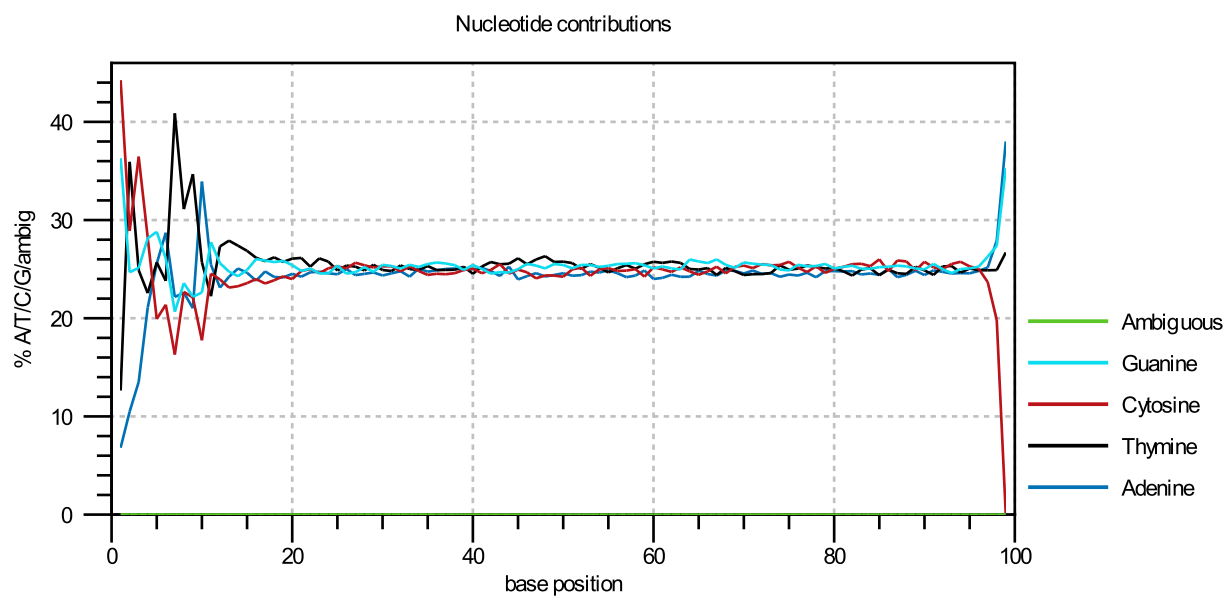

Coverages for the four DNA nucleotides and ambiguous bases.

x: base position

y: number of nucleotides observed per type normalized to the total number of nucleotides observed at that position

### 3.3 GC-content

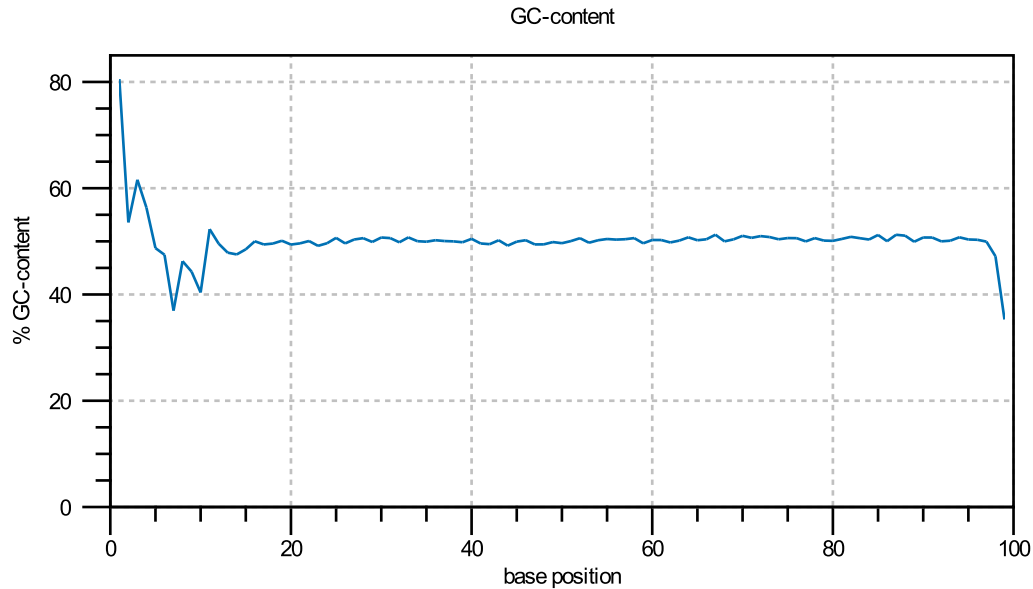

Combined coverage of G- and C-bases.

x: base position

y: number of G- and C-bases observed at current position normalized to the total number of bases observed at that position

### 3.4 Ambiguous base-content

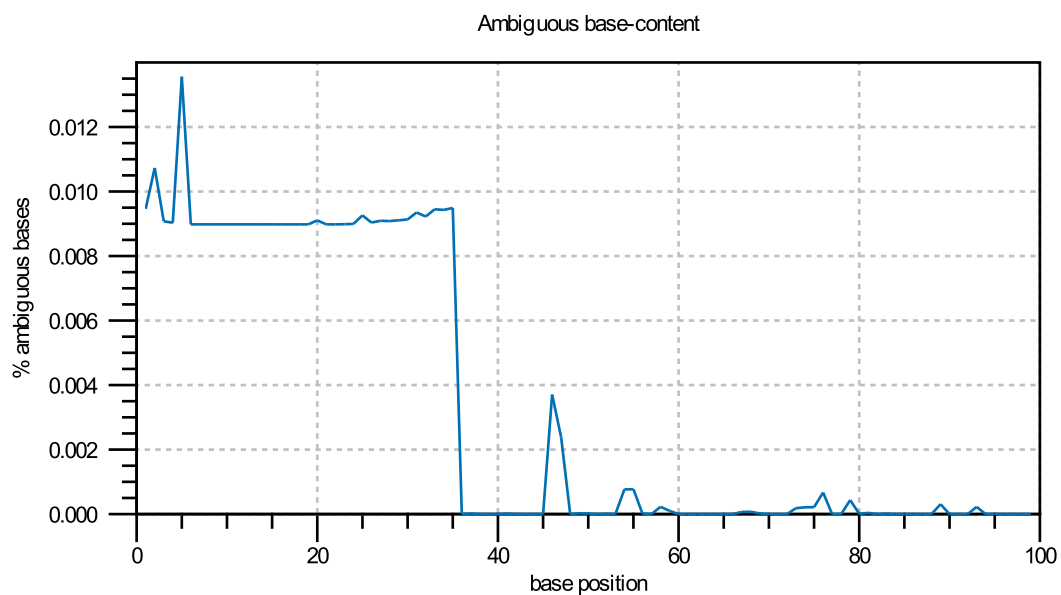

Combined coverage of ambiguous bases.

x: base position

y: number of ambiguous bases observed at current position normalized to the total number of bases observed at that position

### 3.5 Quality distribution



Base-quality distribution along the base positions.

x: base position

y: median & percentiles of quality scores observed at that base position

## 4. Over-representation analyses



## 4.1 Enriched 5-mers

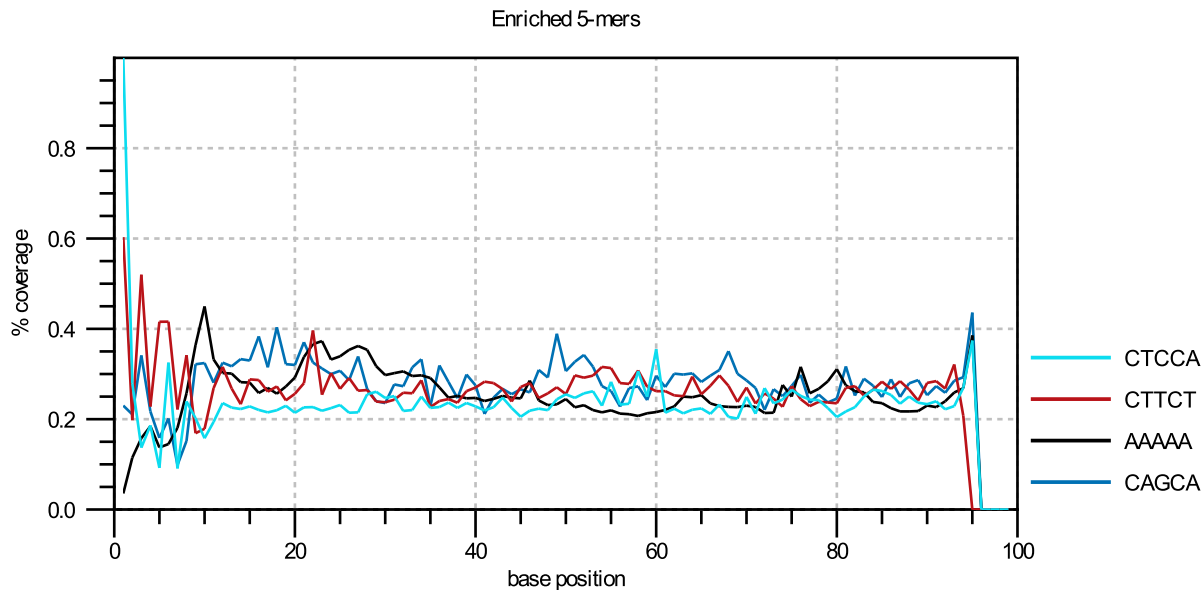

The five most-overrepresented 5-mers. The over-representation of a 5-mer is calculated as the ratio of the observed and expected 5-mer frequency. The expected frequency is calculated as product of the empirical nucleotide probabilities that make up the 5-mer. (5-mers that contain ambiguous bases are ignored)

x: base position

y: number of times a 5-mer has been observed normalized to all 5-mers observed at that position

## 4.2 Sequence duplication levels

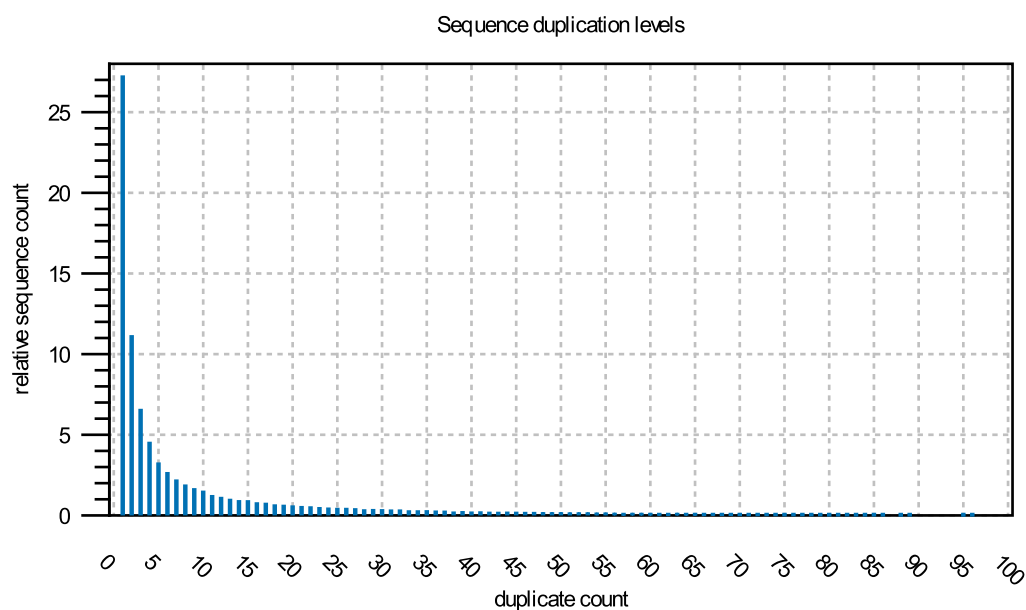

Duplication level distribution. Duplication levels are simply the count of how often a particular sequence has been found.

x: duplicate count

y: number of sequences that have been found that many times normalized to the number of unique sequences

## **4.3 Duplicated sequences**

A table of over-represented sequences is given in the supplementary report

# 1. Summary

|                               |                               |
|-------------------------------|-------------------------------|
| Creation date:                | Fri Dec 23 16:18:22 AEDT 2022 |
| Generated by:                 | 14048742                      |
| Software:                     | CLC Genomics Workbench 22.0   |
| Based upon:                   | 1 data set                    |
| PB3_S8:                       | 80,717,734 sequences          |
| Total sequences in data set   | 80,717,734 sequences          |
| Total nucleotides in data set | 7,936,680,795 nucleotides     |

# 2. Per-sequence analysis

## 2.1 Lengths distribution

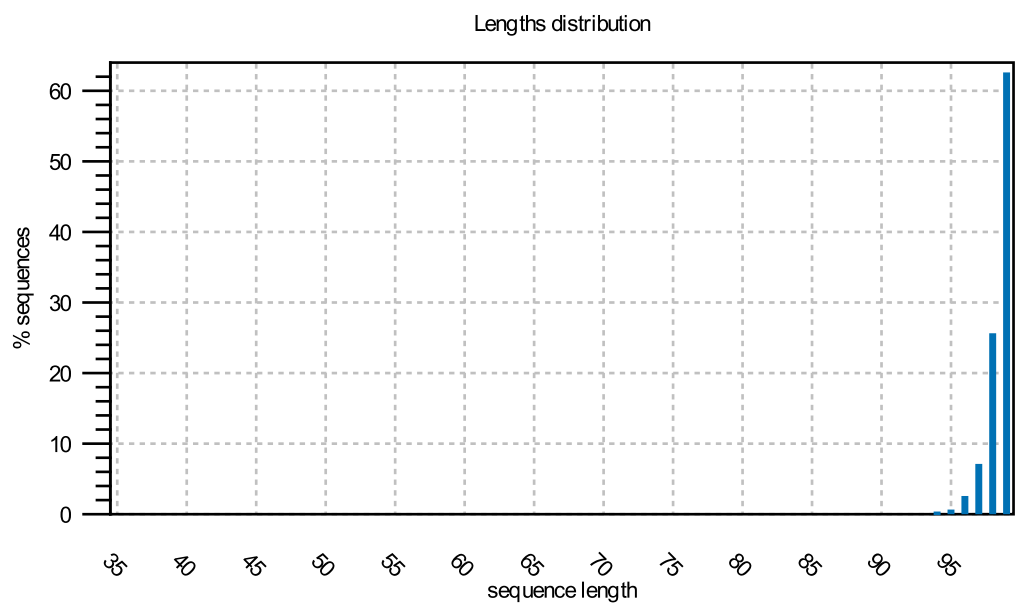

Distribution of sequence lengths. In cases of untrimmed Illumina reads it will just contain a single peak.  
x: sequence length in base-pairs  
y: number of sequences featuring a particular length normalized to the total number of sequences

## 2.2 GC-content

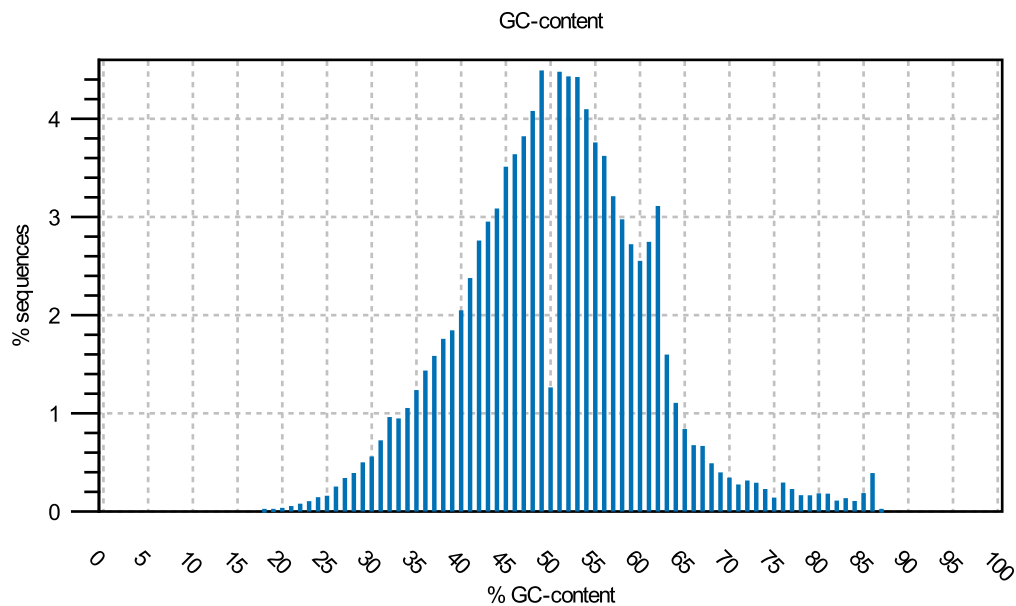

Distribution of GC-contents. The GC-content of a sequence is calculated as the number of GC-bases compared to all bases (including ambiguous bases).

x: relative GC-content of a sequence in percent

y: number of sequences featuring particular GC-percentages normalized to the total number of sequences

## 2.3 Ambiguous base-content



Distribution of N-contents. The N-content of a sequence is calculated as the number of ambiguous bases compared to all bases.

x: relative N-content of a sequence in percent

y: number of sequences featuring particular N-percentages normalized to the total number of sequences

## 2.4 Quality distribution

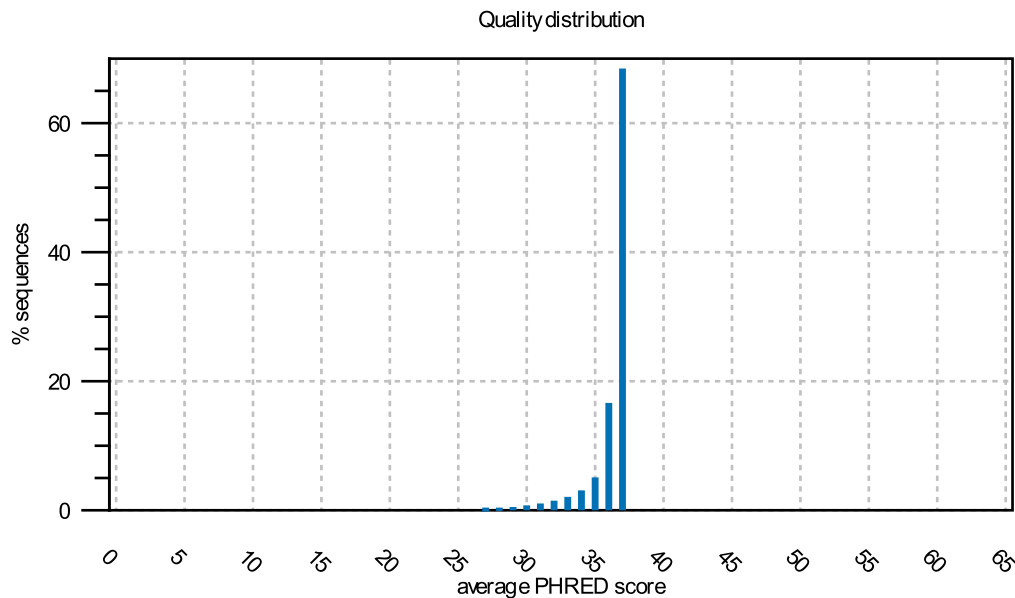

Distribution of average sequence quality scores. The quality of a sequence is calculated as the arithmetic mean of its base qualities.

x: PHRED-score

y: number of sequences observed at that qual. score normalized to the total number of sequences

## 3. Per-base analysis

### 3.1 Coverage

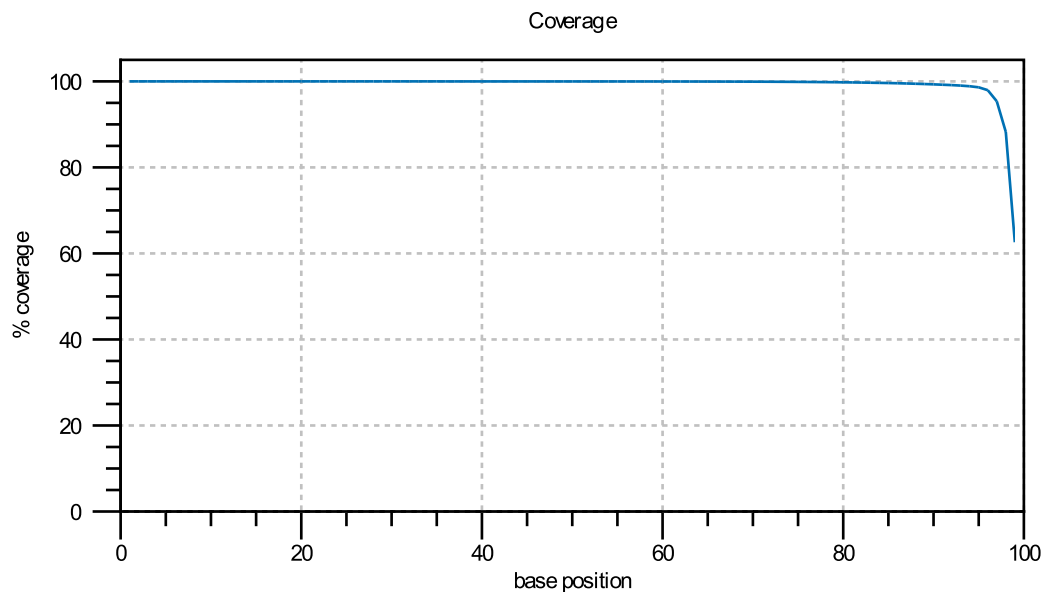

The number of sequences that support (cover) the individual base positions. In cases of untrimmed Illumina reads it will just contain a line.

x: base position

y: number of sequences covering individual base positions normalized to the total number of sequences

### 3.2 Nucleotide contributions

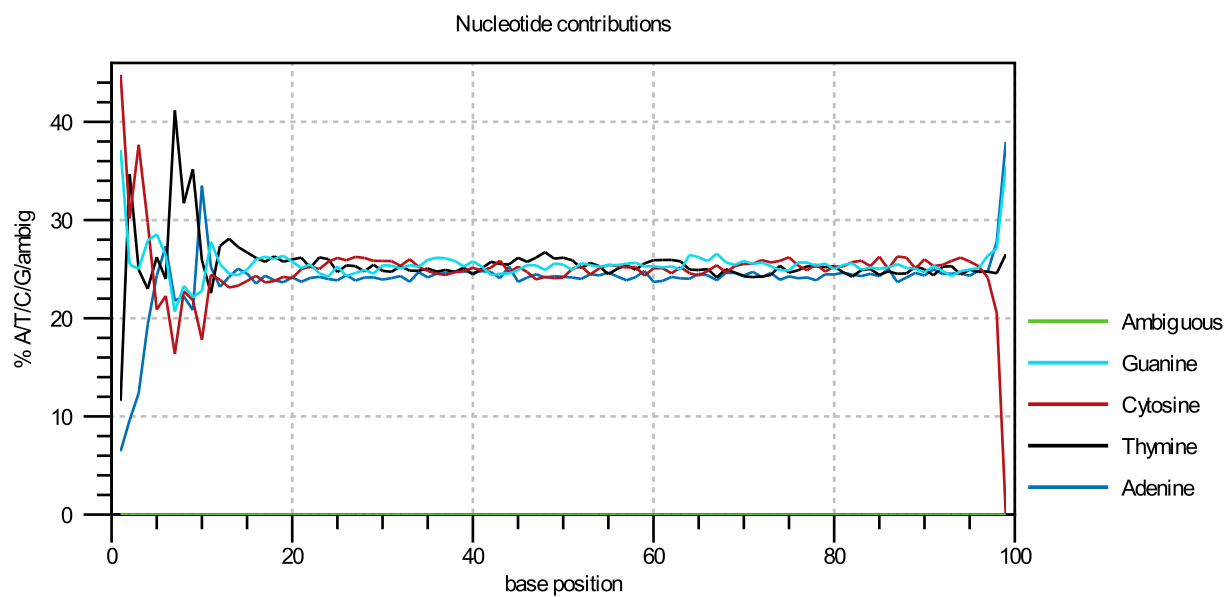

Coverages for the four DNA nucleotides and ambiguous bases.

x: base position

y: number of nucleotides observed per type normalized to the total number of nucleotides observed at that position

### 3.3 GC-content

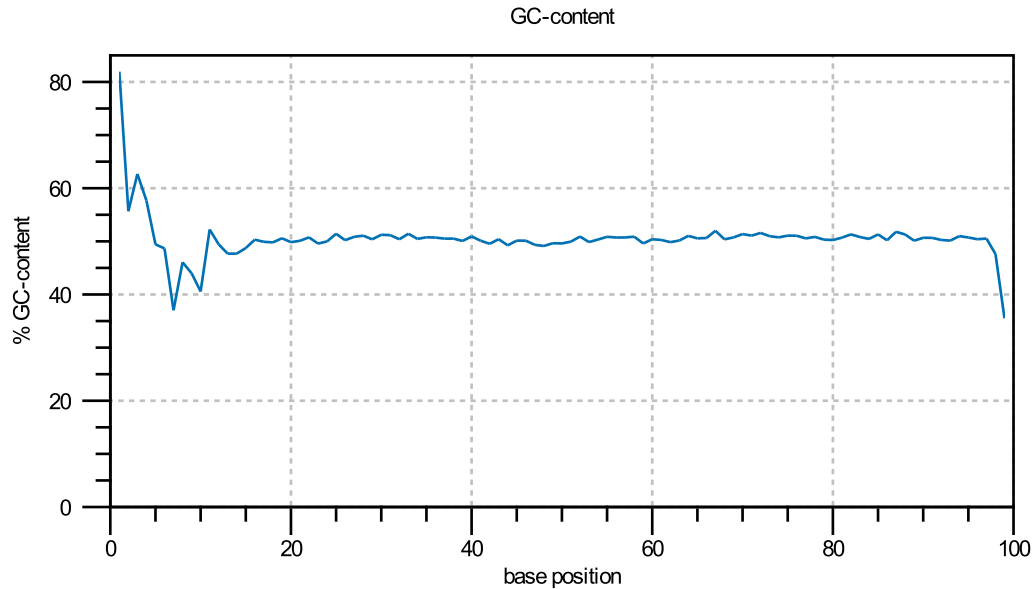

Combined coverage of G- and C-bases.

x: base position

y: number of G- and C-bases observed at current position normalized to the total number of bases observed at that position

### 3.4 Ambiguous base-content

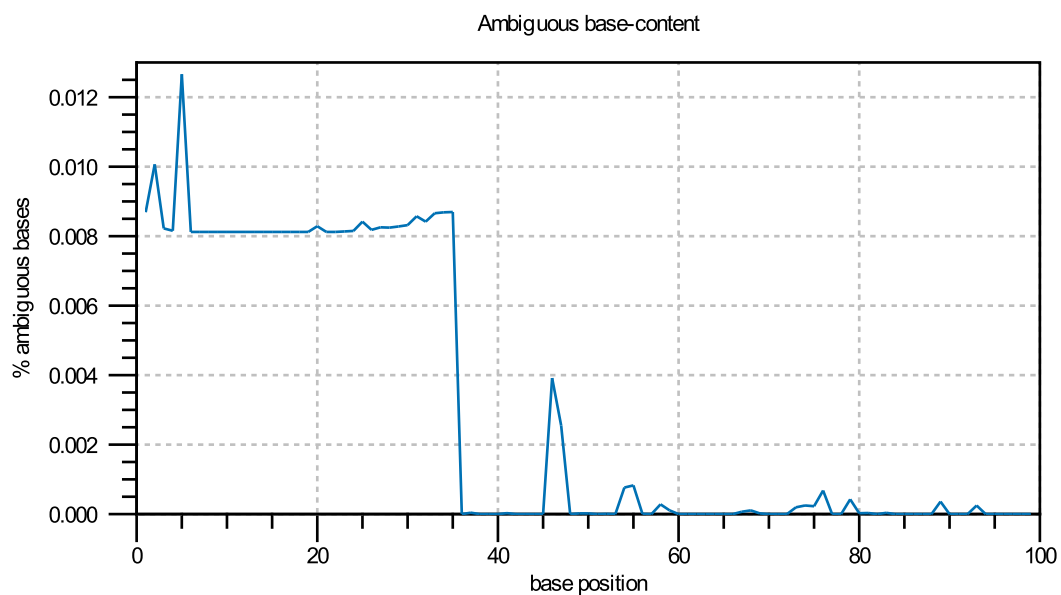

Combined coverage of ambiguous bases.

x: base position

y: number of ambiguous bases observed at current position normalized to the total number of bases observed at that position

### 3.5 Quality distribution

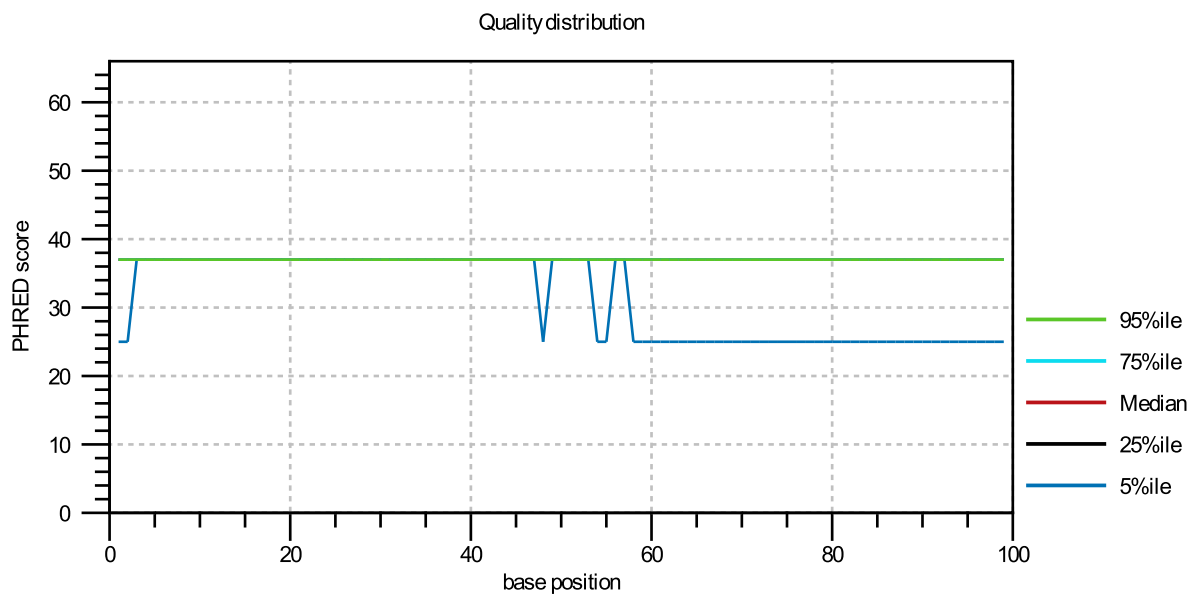

Base-quality distribution along the base positions.

x: base position

y: median & percentiles of quality scores observed at that base position

## 4. Over-representation analyses



## 4.1 Enriched 5-mers

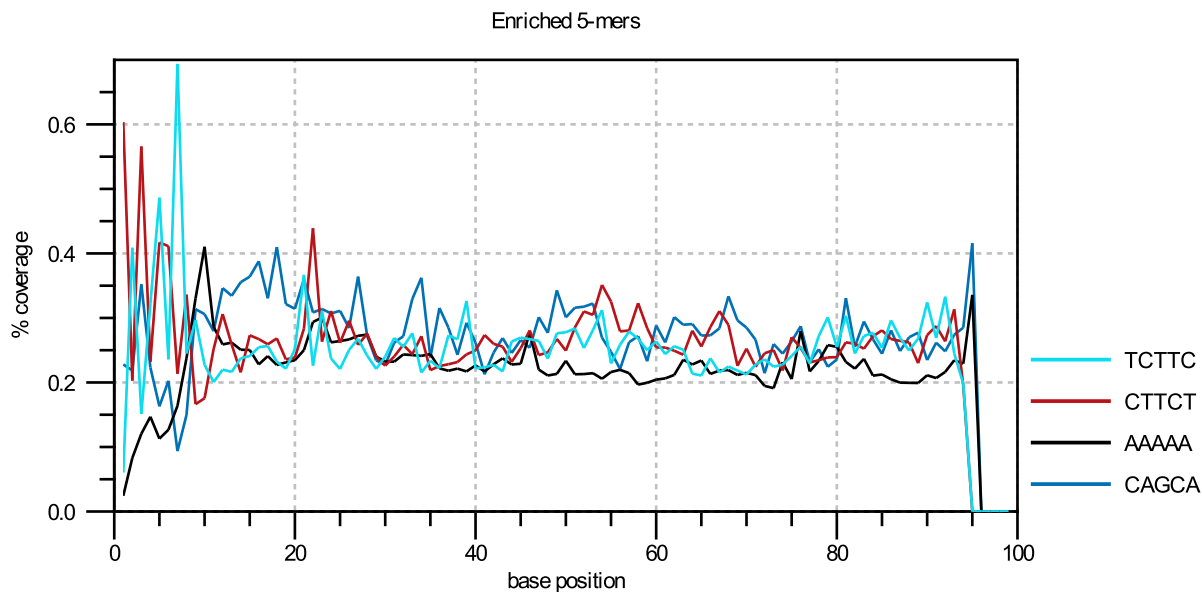

The five most-overrepresented 5-mers. The over-representation of a 5-mer is calculated as the ratio of the observed and expected 5-mer frequency. The expected frequency is calculated as product of the empirical nucleotide probabilities that make up the 5-mer. (5-mers that contain ambiguous bases are ignored)

x: base position

y: number of times a 5-mer has been observed normalized to all 5-mers observed at that position

## 4.2 Sequence duplication levels

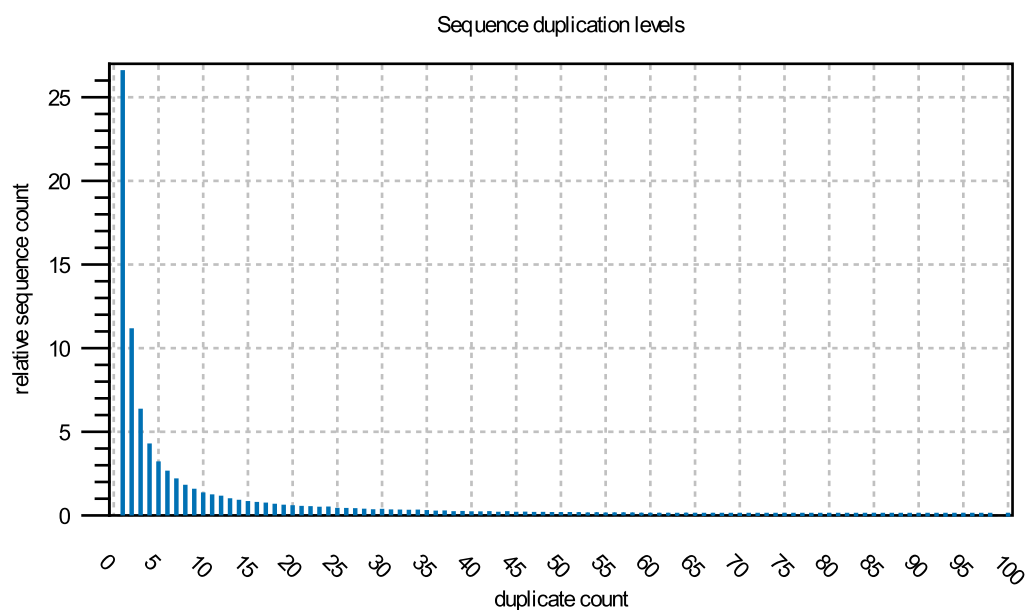

Duplication level distribution. Duplication levels are simply the count of how often a particular sequence has been found.

x: duplicate count

y: number of sequences that have been found that many times normalized to the number of unique sequences

## **4.3 Duplicated sequences**

A table of over-represented sequences is given in the supplementary report

## Table of contents

|                                        |    |
|----------------------------------------|----|
| 1. RNA-Seq analysis .....              | 3  |
| 1.1 Read count statistics .....        | 3  |
| 1.2 Fragment counting statistics ..... | 4  |
| 1.3 Spike-in quality control .....     | 5  |
| 1.4 Strand specificity .....           | 5  |
| 1.5 Adapter read-through .....         | 6  |
| 1.6 Distribution of biotypes .....     | 6  |
| 1.7 Transcript length coverage .....   | 13 |

# 1. RNA-Seq analysis

## 1.1 Read count statistics

For paired data, there are two reads in a pair.

The table is based on 12 samples.

| Sample name               | Read count    | Single, mapped (%) | Single, not mapped (%) | Paired, mapped pairs (%) |
|---------------------------|---------------|--------------------|------------------------|--------------------------|
| NL1_S1 (RNA-Seq report)   | 71,177,957    | 98.19              | 1.81                   | -                        |
| NL2_S11 (RNA-Seq report)  | 78,295,601    | 98.57              | 1.43                   | -                        |
| NL3_S4 (RNA-Seq report)   | 75,867,324    | 97.82              | 2.18                   | -                        |
| DL1_S7 (RNA-Seq report)   | 71,673,917    | 97.80              | 2.20                   | -                        |
| DL2_S3 (RNA-Seq report)   | 78,503,589    | 98.12              | 1.88                   | -                        |
| DL3_S2 (RNA-Seq report)   | 75,928,949    | 97.89              | 2.11                   | -                        |
| AAV1_S12 (RNA-Seq report) | 73,054,598    | 97.71              | 2.29                   | -                        |
| AAV2_S9 (RNA-Seq report)  | 88,511,361    | 97.53              | 2.47                   | -                        |
| AAV3_S6 (RNA-Seq report)  | 97,585,420    | 96.67              | 3.33                   | -                        |
| PB1_S5 (RNA-Seq report)   | 68,966,610    | 97.82              | 2.18                   | -                        |
| PB2_S10 (RNA-Seq report)  | 67,920,378    | 98.13              | 1.87                   | -                        |
| PB3_S8 (RNA-Seq report)   | 80,717,734    | 98.08              | 1.92                   | -                        |
| Minimum                   | 67,920,378.00 | 96.67              | 1.43                   | -                        |
| Median                    | 75,898,136.50 | 97.85              | 2.15                   | -                        |
| Maximum                   | 97,585,420.00 | 98.57              | 3.33                   | -                        |
| Mean                      | 77,350,286.50 | 97.86              | 2.14                   | -                        |
| Standard deviation        | 8,526,930.53  | 0.46               | 0.46                   | -                        |

| Sample name             | Paired, broken pairs (%) | Paired, not mapped (%) |
|-------------------------|--------------------------|------------------------|
| NL1_S1 (RNA-Seq report) | -                        | -                      |

| Sample name               | Paired, broken pairs (%) | Paired, not mapped (%) |
|---------------------------|--------------------------|------------------------|
| NL2_S11 (RNA-Seq report)  | -                        | -                      |
| NL3_S4 (RNA-Seq report)   | -                        | -                      |
| DL1_S7 (RNA-Seq report)   | -                        | -                      |
| DL2_S3 (RNA-Seq report)   | -                        | -                      |
| DL3_S2 (RNA-Seq report)   | -                        | -                      |
| AAV1_S12 (RNA-Seq report) | -                        | -                      |
| AAV2_S9 (RNA-Seq report)  | -                        | -                      |
| AAV3_S6 (RNA-Seq report)  | -                        | -                      |
| PB1_S5 (RNA-Seq report)   | -                        | -                      |
| PB2_S10 (RNA-Seq report)  | -                        | -                      |
| PB3_S8 (RNA-Seq report)   | -                        | -                      |
| Minimum                   | -                        | -                      |
| Median                    | -                        | -                      |
| Maximum                   | -                        | -                      |
| Mean                      | -                        | -                      |
| Standard deviation        | -                        | -                      |

## 1.2 Fragment counting statistics

The table is based on 12 samples.

| Sample name               | Mapped to genes (%) | Mapped to intergenic (%) |
|---------------------------|---------------------|--------------------------|
| NL1_S1 (RNA-Seq report)   | 96.58               | 3.42                     |
| NL2_S11 (RNA-Seq report)  | 96.69               | 3.31                     |
| NL3_S4 (RNA-Seq report)   | 95.99               | 4.01                     |
| DL1_S7 (RNA-Seq report)   | 96.25               | 3.75                     |
| DL2_S3 (RNA-Seq report)   | 95.94               | 4.06                     |
| DL3_S2 (RNA-Seq report)   | 96.42               | 3.58                     |
| AAV1_S12 (RNA-Seq report) | 96.25               | 3.75                     |
| AAV2_S9 (RNA-Seq report)  | 95.84               | 4.16                     |
| AAV3_S6 (RNA-Seq report)  | 95.93               | 4.07                     |

| Sample name              | Mapped to genes (%) | Mapped to intergenic (%) |
|--------------------------|---------------------|--------------------------|
| PB1_S5 (RNA-Seq report)  | 96.24               | 3.76                     |
| PB2_S10 (RNA-Seq report) | 96.59               | 3.41                     |
| PB3_S8 (RNA-Seq report)  | 96.14               | 3.86                     |
| Minimum                  | 95.84               | 3.31                     |
| Median                   | 96.24               | 3.76                     |
| Maximum                  | 96.69               | 4.16                     |
| Mean                     | 96.24               | 3.76                     |
| Standard deviation       | 0.28                | 0.28                     |

## 1.3 Spike-in quality control

No data available

## 1.4 Strand specificity

The table is based on 12 samples.

| Sample name               | Strand specific setting | Forward reads mapped (%) | Reverse reads mapped (%) | Ignored reads (wrong strand) (%) |
|---------------------------|-------------------------|--------------------------|--------------------------|----------------------------------|
| NL1_S1 (RNA-Seq report)   | Both                    | 1.59                     | 98.41                    | 0                                |
| NL2_S11 (RNA-Seq report)  | Both                    | 1.17                     | 98.83                    | 0                                |
| NL3_S4 (RNA-Seq report)   | Both                    | 1.71                     | 98.29                    | 0                                |
| DL1_S7 (RNA-Seq report)   | Both                    | 1.81                     | 98.19                    | 0                                |
| DL2_S3 (RNA-Seq report)   | Both                    | 1.75                     | 98.25                    | 0                                |
| DL3_S2 (RNA-Seq report)   | Both                    | 1.47                     | 98.53                    | 0                                |
| AAV1_S12 (RNA-Seq report) | Both                    | 1.69                     | 98.31                    | 0                                |
| AAV2_S9 (RNA-Seq report)  | Both                    | 1.92                     | 98.08                    | 0                                |
| AAV3_S6 (RNA-Seq report)  | Both                    | 1.70                     | 98.30                    | 0                                |
| PB1_S5 (RNA-Seq report)   | Both                    | 1.58                     | 98.42                    | 0                                |
| PB2_S10 (RNA-Seq report)  | Both                    | 1.31                     | 98.69                    | 0                                |
| PB3_S8 (RNA-Seq report)   | Both                    | 1.67                     | 98.33                    | 0                                |
| Minimum                   | -                       | 1.17                     | 98.08                    | 0.00                             |

| Sample name        | Strand specific setting | Forward reads mapped (%) | Reverse reads mapped (%) | Ignored reads (wrong strand) (%) |
|--------------------|-------------------------|--------------------------|--------------------------|----------------------------------|
| Median             | -                       | 1.68                     | 98.32                    | 0.00                             |
| Maximum            | -                       | 1.92                     | 98.83                    | 0.00                             |
| Mean               | -                       | 1.61                     | 98.39                    | 0.00                             |
| Standard deviation | -                       | 0.21                     | 0.21                     | 0.00                             |

Strand specific setting: >90% of reads were mapped in the same orientation. Consider re-running the tool with a strand specific setting ("Forward"/"Reverse").

## 1.5 Adapter read-through

No data available

## 1.6 Distribution of biotypes

The table is based on 12 samples.

| Sample name               | protein_coding | nonsense_mediated_decay | processed_transcript | retained_intron |
|---------------------------|----------------|-------------------------|----------------------|-----------------|
| NL1_S1 (RNA-Seq report)   | 96.49          | 1.05                    | 0.88                 | 0.88            |
| NL2_S11 (RNA-Seq report)  | 96.51          | 1.01                    | 0.82                 | 0.87            |
| NL3_S4 (RNA-Seq report)   | 96.49          | 1.01                    | 0.85                 | 0.86            |
| DL1_S7 (RNA-Seq report)   | 96.16          | 1.12                    | 0.97                 | 0.95            |
| DL2_S3 (RNA-Seq report)   | 96.75          | 1.06                    | 0.85                 | 0.82            |
| DL3_S2 (RNA-Seq report)   | 96.53          | 1.08                    | 0.86                 | 0.84            |
| AAV1_S12 (RNA-Seq report) | 96.59          | 1.04                    | 0.85                 | 0.73            |
| AAV2_S9 (RNA-Seq report)  | 96.60          | 0.96                    | 0.85                 | 0.76            |
| AAV3_S6 (RNA-Seq report)  | 96.12          | 0.96                    | 0.83                 | 0.79            |
| PB1_S5 (RNA-Seq report)   | 96.46          | 0.89                    | 0.86                 | 0.93            |
| PB2_S10 (RNA-Seq report)  | 96.71          | 0.94                    | 0.80                 | 0.76            |
| PB3_S8 (RNA-Seq report)   | 96.39          | 1.05                    | 0.88                 | 0.94            |
| Minimum                   | 96.12          | 0.89                    | 0.80                 | 0.73            |
| Median                    | 96.50          | 1.03                    | 0.85                 | 0.85            |

| Sample name        | protein_coding | nonsense_mediated_decay | processed_transcript | retained_intron |
|--------------------|----------------|-------------------------|----------------------|-----------------|
| Maximum            | 96.75          | 1.12                    | 0.97                 | 0.95            |
| Mean               | 96.48          | 1.01                    | 0.86                 | 0.84            |
| Standard deviation | 0.19           | 0.06                    | 0.04                 | 0.07            |

| Sample name               | lincRNA | unprocessed_pseudo_gene | pseudogene | antisense |
|---------------------------|---------|-------------------------|------------|-----------|
| NL1_S1 (RNA-Seq report)   | 0.36    | 0.19                    | 0.05       | 0.07      |
| NL2_S11 (RNA-Seq report)  | 0.35    | 0.28                    | 0.07       | 0.06      |
| NL3_S4 (RNA-Seq report)   | 0.40    | 0.19                    | 0.10       | 0.07      |
| DL1_S7 (RNA-Seq report)   | 0.54    | 0.06                    | 0.10       | 0.06      |
| DL2_S3 (RNA-Seq report)   | 0.30    | 0.07                    | 0.05       | 0.07      |
| DL3_S2 (RNA-Seq report)   | 0.45    | 0.07                    | 0.08       | 0.07      |
| AAV1_S12 (RNA-Seq report) | 0.40    | 0.12                    | 0.06       | 0.06      |
| AAV2_S9 (RNA-Seq report)  | 0.37    | 0.23                    | 0.07       | 0.06      |
| AAV3_S6 (RNA-Seq report)  | 0.77    | 0.19                    | 0.20       | 0.06      |
| PB1_S5 (RNA-Seq report)   | 0.46    | 0.19                    | 0.10       | 0.06      |
| PB2_S10 (RNA-Seq report)  | 0.45    | 0.16                    | 0.09       | 0.05      |
| PB3_S8 (RNA-Seq report)   | 0.40    | 0.17                    | 0.05       | 0.07      |
| Minimum                   | 0.30    | 0.06                    | 0.05       | 0.05      |
| Median                    | 0.40    | 0.18                    | 0.07       | 0.06      |
| Maximum                   | 0.77    | 0.28                    | 0.20       | 0.07      |
| Mean                      | 0.44    | 0.16                    | 0.08       | 0.06      |
| Standard deviation        | 0.12    | 0.07                    | 0.04       | 0.00      |

| Sample name              | IG_C_gene | polymorphic_pseudo_gene | IG_V_gene | transcribed_unprocessed_pseudogene |
|--------------------------|-----------|-------------------------|-----------|------------------------------------|
| NL1_S1 (RNA-Seq report)  | 0.00      | 0.01                    | 0.00      | 0.00                               |
| NL2_S11 (RNA-Seq report) | 0.01      | 0.01                    | 0.00      | 0.00                               |
| NL3_S4 (RNA-Seq report)  | 0.02      | 0.01                    | 0.00      | 0.00                               |



| Sample name                  | IG_C_gene | polymorphic_pseudo<br>gene | IG_V_gene | transcribed_unproces<br>sed_pseudogene |
|------------------------------|-----------|----------------------------|-----------|----------------------------------------|
| DL1_S7 (RNA-Seq<br>report)   | 0.00      | 0.02                       | 0.00      | 0.00                                   |
| DL2_S3 (RNA-Seq<br>report)   | 0.00      | 0.01                       | 0.00      | 0.00                                   |
| DL3_S2 (RNA-Seq<br>report)   | 0.00      | 0.01                       | 0.00      | 0.00                                   |
| AAV1_S12 (RNA-Seq<br>report) | 0.10      | 0.01                       | 0.03      | 0.00                                   |
| AAV2_S9 (RNA-Seq<br>report)  | 0.05      | 0.01                       | 0.02      | 0.00                                   |
| AAV3_S6 (RNA-Seq<br>report)  | 0.05      | 0.01                       | 0.01      | 0.00                                   |
| PB1_S5 (RNA-Seq<br>report)   | 0.01      | 0.01                       | 0.00      | 0.00                                   |
| PB2_S10 (RNA-Seq<br>report)  | 0.01      | 0.01                       | 0.00      | 0.00                                   |
| PB3_S8 (RNA-Seq<br>report)   | 0.01      | 0.02                       | 0.00      | 0.01                                   |
| Minimum                      | 0.00      | 0.01                       | 0.00      | 0.00                                   |
| Median                       | 0.01      | 0.01                       | 0.00      | 0.00                                   |
| Maximum                      | 0.10      | 0.02                       | 0.03      | 0.01                                   |
| Mean                         | 0.02      | 0.01                       | 0.01      | 0.00                                   |
| Standard deviation           | 0.03      | 0.00                       | 0.01      | 0.00                                   |

| Sample name                  | processed_pseudoge<br>ne | bidirectional_promote<br>r_lncRNA | sense_intronic | non_stop_decay |
|------------------------------|--------------------------|-----------------------------------|----------------|----------------|
| NL1_S1 (RNA-Seq<br>report)   | 0.00                     | 0.00                              | 0.00           | 0.00           |
| NL2_S11 (RNA-Seq<br>report)  | 0.00                     | 0.00                              | 0.00           | 0.00           |
| NL3_S4 (RNA-Seq<br>report)   | 0.00                     | 0.00                              | 0.00           | 0.00           |
| DL1_S7 (RNA-Seq<br>report)   | 0.00                     | 0.00                              | 0.00           | 0.00           |
| DL2_S3 (RNA-Seq<br>report)   | 0.00                     | 0.00                              | 0.00           | 0.00           |
| DL3_S2 (RNA-Seq<br>report)   | 0.00                     | 0.00                              | 0.00           | 0.00           |
| AAV1_S12 (RNA-Seq<br>report) | 0.00                     | 0.00                              | 0.00           | 0.00           |
| AAV2_S9 (RNA-Seq<br>report)  | 0.00                     | 0.00                              | 0.00           | 0.00           |
| AAV3_S6 (RNA-Seq<br>report)  | 0.00                     | 0.00                              | 0.00           | 0.00           |

| Sample name              | processed_pseudogene | bidirectional_promoter_lncRNA | sense_intronic | non_stop_decay |
|--------------------------|----------------------|-------------------------------|----------------|----------------|
| PB1_S5 (RNA-Seq report)  | 0.00                 | 0.00                          | 0.00           | 0.00           |
| PB2_S10 (RNA-Seq report) | 0.00                 | 0.00                          | 0.00           | 0.00           |
| PB3_S8 (RNA-Seq report)  | 0.00                 | 0.00                          | 0.00           | 0.00           |
| Minimum                  | 0.00                 | 0.00                          | 0.00           | 0.00           |
| Median                   | 0.00                 | 0.00                          | 0.00           | 0.00           |
| Maximum                  | 0.00                 | 0.00                          | 0.00           | 0.00           |
| Mean                     | 0.00                 | 0.00                          | 0.00           | 0.00           |
| Standard deviation       | 0.00                 | 0.00                          | 0.00           | 0.00           |

| Sample name               | unitary_pseudogene | TR_C_gene | TR_V_gene | IG_V_pseudogene |
|---------------------------|--------------------|-----------|-----------|-----------------|
| NL1_S1 (RNA-Seq report)   | 0.00               | 0.00      | 0.00      | 0.00            |
| NL2_S11 (RNA-Seq report)  | 0.00               | 0.00      | 0.00      | 0.00            |
| NL3_S4 (RNA-Seq report)   | 0.00               | 0.00      | 0.00      | 0.00            |
| DL1_S7 (RNA-Seq report)   | 0.00               | 0.00      | 0.00      | 0.00            |
| DL2_S3 (RNA-Seq report)   | 0.00               | 0.00      | 0.00      | 0.00            |
| DL3_S2 (RNA-Seq report)   | 0.00               | 0.00      | 0.00      | 0.00            |
| AAV1_S12 (RNA-Seq report) | 0.00               | 0.00      | 0.00      | 0.00            |
| AAV2_S9 (RNA-Seq report)  | 0.00               | 0.00      | 0.00      | 0.00            |
| AAV3_S6 (RNA-Seq report)  | 0.00               | 0.00      | 0.00      | 0.00            |
| PB1_S5 (RNA-Seq report)   | 0.00               | 0.00      | 0.00      | 0.00            |
| PB2_S10 (RNA-Seq report)  | 0.00               | 0.00      | 0.00      | 0.00            |
| PB3_S8 (RNA-Seq report)   | 0.00               | 0.00      | 0.00      | 0.00            |
| Minimum                   | 0.00               | 0.00      | 0.00      | 0.00            |
| Median                    | 0.00               | 0.00      | 0.00      | 0.00            |
| Maximum                   | 0.00               | 0.00      | 0.00      | 0.00            |
| Mean                      | 0.00               | 0.00      | 0.00      | 0.00            |

| Sample name        | unitary_pseudogene | TR_C_gene | TR_V_gene | IG_V_pseudogene |
|--------------------|--------------------|-----------|-----------|-----------------|
| Standard deviation | 0.00               | 0.00      | 0.00      | 0.00            |

| Sample name               | transcribed_processed_pseudogene | sense_overlapping | IG_LV_gene | TEC  |
|---------------------------|----------------------------------|-------------------|------------|------|
| NL1_S1 (RNA-Seq report)   | 0.00                             | 0.00              | 0.00       | 0.00 |
| NL2_S11 (RNA-Seq report)  | 0.00                             | 0.00              | 0.00       | 0.00 |
| NL3_S4 (RNA-Seq report)   | 0.00                             | 0.00              | 0.00       | 0.00 |
| DL1_S7 (RNA-Seq report)   | 0.00                             | 0.00              | 0.00       | 0.00 |
| DL2_S3 (RNA-Seq report)   | 0.00                             | 0.00              | 0.00       | 0.00 |
| DL3_S2 (RNA-Seq report)   | 0.00                             | 0.00              | 0.00       | 0.00 |
| AAV1_S12 (RNA-Seq report) | 0.00                             | 0.00              | 0.00       | 0.00 |
| AAV2_S9 (RNA-Seq report)  | 0.00                             | 0.00              | 0.00       | 0.00 |
| AAV3_S6 (RNA-Seq report)  | 0.00                             | 0.00              | 0.00       | 0.00 |
| PB1_S5 (RNA-Seq report)   | 0.00                             | 0.00              | 0.00       | 0.00 |
| PB2_S10 (RNA-Seq report)  | 0.00                             | 0.00              | 0.00       | 0.00 |
| PB3_S8 (RNA-Seq report)   | 0.00                             | 0.00              | 0.00       | 0.00 |
| Minimum                   | 0.00                             | 0.00              | 0.00       | 0.00 |
| Median                    | 0.00                             | 0.00              | 0.00       | 0.00 |
| Maximum                   | 0.00                             | 0.00              | 0.00       | 0.00 |
| Mean                      | 0.00                             | 0.00              | 0.00       | 0.00 |
| Standard deviation        | 0.00                             | 0.00              | 0.00       | 0.00 |

| Sample name              | translated_processed_pseudogene | transcribed_unitary_pseudogene | macro_lncRNA | TR_V_pseudogene |
|--------------------------|---------------------------------|--------------------------------|--------------|-----------------|
| NL1_S1 (RNA-Seq report)  | 0.00                            | 0.00                           | 0.00         | 0.00            |
| NL2_S11 (RNA-Seq report) | 0.00                            | 0.00                           | 0.00         | 0.00            |
| NL3_S4 (RNA-Seq report)  | 0.00                            | 0.00                           | 0.00         | 0.00            |
| DL1_S7 (RNA-Seq report)  | 0.00                            | 0.00                           | 0.00         | 0.00            |
| DL2_S3 (RNA-Seq report)  | 0.00                            | 0.00                           | 0.00         | 0.00            |

| Sample name               | translated_processed_pseudogene | transcribed_unitary_pseudogene | macro_lncRNA | TR_V_pseudogene |
|---------------------------|---------------------------------|--------------------------------|--------------|-----------------|
| DL3_S2 (RNA-Seq report)   | 0.00                            | 0.00                           | 0.00         | 0.00            |
| AAV1_S12 (RNA-Seq report) | 0.00                            | 0.00                           | 0.00         | 0.00            |
| AAV2_S9 (RNA-Seq report)  | 0.00                            | 0.00                           | 0.00         | 0.00            |
| AAV3_S6 (RNA-Seq report)  | 0.00                            | 0.00                           | 0.00         | 0.00            |
| PB1_S5 (RNA-Seq report)   | 0.00                            | 0.00                           | 0.00         | 0.00            |
| PB2_S10 (RNA-Seq report)  | 0.00                            | 0.00                           | 0.00         | 0.00            |
| PB3_S8 (RNA-Seq report)   | 0.00                            | 0.00                           | 0.00         | 0.00            |
| Minimum                   | 0.00                            | 0.00                           | 0.00         | 0.00            |
| Median                    | 0.00                            | 0.00                           | 0.00         | 0.00            |
| Maximum                   | 0.00                            | 0.00                           | 0.00         | 0.00            |
| Mean                      | 0.00                            | 0.00                           | 0.00         | 0.00            |
| Standard deviation        | 0.00                            | 0.00                           | 0.00         | 0.00            |

| Sample name               | TR_J_gene | IG_J_gene | 3prime_overlapping_ncRNA | IG_C_pseudogene |
|---------------------------|-----------|-----------|--------------------------|-----------------|
| NL1_S1 (RNA-Seq report)   | 0.00      | 0.00      | 0.00                     | 0               |
| NL2_S11 (RNA-Seq report)  | 0.00      | 0.00      | 0.00                     | 0               |
| NL3_S4 (RNA-Seq report)   | 0.00      | 0.00      | 0.00                     | 0               |
| DL1_S7 (RNA-Seq report)   | 0.00      | 0.00      | 0.00                     | 0               |
| DL2_S3 (RNA-Seq report)   | 0.00      | 0.00      | 0.00                     | 0               |
| DL3_S2 (RNA-Seq report)   | 0.00      | 0.00      | 0.00                     | 0               |
| AAV1_S12 (RNA-Seq report) | 0.00      | 0.00      | 0.00                     | 0               |
| AAV2_S9 (RNA-Seq report)  | 0.00      | 0.00      | 0.00                     | 0               |
| AAV3_S6 (RNA-Seq report)  | 0.00      | 0.00      | 0.00                     | 0               |
| PB1_S5 (RNA-Seq report)   | 0.00      | 0.00      | 0.00                     | 0               |
| PB2_S10 (RNA-Seq report)  | 0.00      | 0.00      | 0.00                     | 0               |

| Sample name             | TR_J_gene | IG_J_gene | 3prime_overlapping_<br>ncRNA | IG_C_pseudogene |
|-------------------------|-----------|-----------|------------------------------|-----------------|
| PB3_S8 (RNA-Seq report) | 0.00      | 0.00      | 0.00                         | 0               |
| Minimum                 | 0.00      | 0.00      | 0.00                         | 0.00            |
| Median                  | 0.00      | 0.00      | 0.00                         | 0.00            |
| Maximum                 | 0.00      | 0.00      | 0.00                         | 0.00            |
| Mean                    | 0.00      | 0.00      | 0.00                         | 0.00            |
| Standard deviation      | 0.00      | 0.00      | 0.00                         | 0.00            |

| Sample name               | TR_D_gene | IG_D_gene | IG_pseudogene |
|---------------------------|-----------|-----------|---------------|
| NL1_S1 (RNA-Seq report)   | 0         | 0         | 0             |
| NL2_S11 (RNA-Seq report)  | 0         | 0         | 0             |
| NL3_S4 (RNA-Seq report)   | 0         | 0         | 0             |
| DL1_S7 (RNA-Seq report)   | 0         | 0         | 0             |
| DL2_S3 (RNA-Seq report)   | 0         | 0         | 0             |
| DL3_S2 (RNA-Seq report)   | 0         | 0         | 0             |
| AAV1_S12 (RNA-Seq report) | 0         | 0         | 0             |
| AAV2_S9 (RNA-Seq report)  | 0         | 0         | 0             |
| AAV3_S6 (RNA-Seq report)  | 0         | 0         | 0             |
| PB1_S5 (RNA-Seq report)   | 0         | 0         | 0             |
| PB2_S10 (RNA-Seq report)  | 0         | 0         | 0             |
| PB3_S8 (RNA-Seq report)   | 0         | 0         | 0             |
| Minimum                   | 0.00      | 0.00      | 0.00          |
| Median                    | 0.00      | 0.00      | 0.00          |
| Maximum                   | 0.00      | 0.00      | 0.00          |
| Mean                      | 0.00      | 0.00      | 0.00          |
| Standard deviation        | 0.00      | 0.00      | 0.00          |

## 1.7 Transcript length coverage

The table is based on 12 samples.

| Sample name               | Expected coverage bias | Difference between average 3' and 5' normalized counts | Reads mapping to transcripts that are longer than 10,000 bp (%) |
|---------------------------|------------------------|--------------------------------------------------------|-----------------------------------------------------------------|
| NL1_S1 (RNA-Seq report)   | Unbiased               | 8.37                                                   | 2.22                                                            |
| NL2_S11 (RNA-Seq report)  | Unbiased               | 8.48                                                   | 2.03                                                            |
| NL3_S4 (RNA-Seq report)   | Unbiased               | 10.86                                                  | 2.85                                                            |
| DL1_S7 (RNA-Seq report)   | Unbiased               | 11.34                                                  | 2.44                                                            |
| DL2_S3 (RNA-Seq report)   | Unbiased               | 13.64                                                  | 2.40                                                            |
| DL3_S2 (RNA-Seq report)   | Unbiased               | 12.31                                                  | 3.28                                                            |
| AAV1_S12 (RNA-Seq report) | Unbiased               | 9.37                                                   | 2.94                                                            |
| AAV2_S9 (RNA-Seq report)  | Unbiased               | 8.87                                                   | 2.01                                                            |
| AAV3_S6 (RNA-Seq report)  | Unbiased               | 9.40                                                   | 3.02                                                            |
| PB1_S5 (RNA-Seq report)   | Unbiased               | 8.48                                                   | 3.23                                                            |
| PB2_S10 (RNA-Seq report)  | Unbiased               | 7.44                                                   | 2.47                                                            |
| PB3_S8 (RNA-Seq report)   | Unbiased               | 9.17                                                   | 1.93                                                            |
| Minimum                   | -                      | 7.44                                                   | 1.93                                                            |
| Median                    | -                      | 9.27                                                   | 2.45                                                            |
| Maximum                   | -                      | 13.64                                                  | 3.28                                                            |
| Mean                      | -                      | 9.81                                                   | 2.57                                                            |
| Standard deviation        | -                      | 1.84                                                   | 0.48                                                            |
