# Supplementary material for: Transcriptomic Analysis of Insulin-Secreting Murine Hepatocytes Transduced with an Integrating Adeno-Associated Viral Vector
Source: MDPI journal article supplement (doi:10.3390/ijtm3030026), 2023-09-06
Supplement: s1 [file s1]

Archive with 6 entries (6 files):
- Figure S1.pdf
- Figure S2.pdf
- Figure S3.pdf
- Supplementary Material S1.pdf
- Supplementary Material S2.pdf
- Table S1.tif
