# Supplementary material for: Transcriptomic Analysis of Insulin-Secreting Murine Hepatocytes Transduced with an Integrating Adeno-Associated Viral Vector
Source: MDPI journal article supplement (doi:10.3390/ijtm3030026), 2023-09-06
Supplement: s1 [file s1 › Figure S3.pdf]

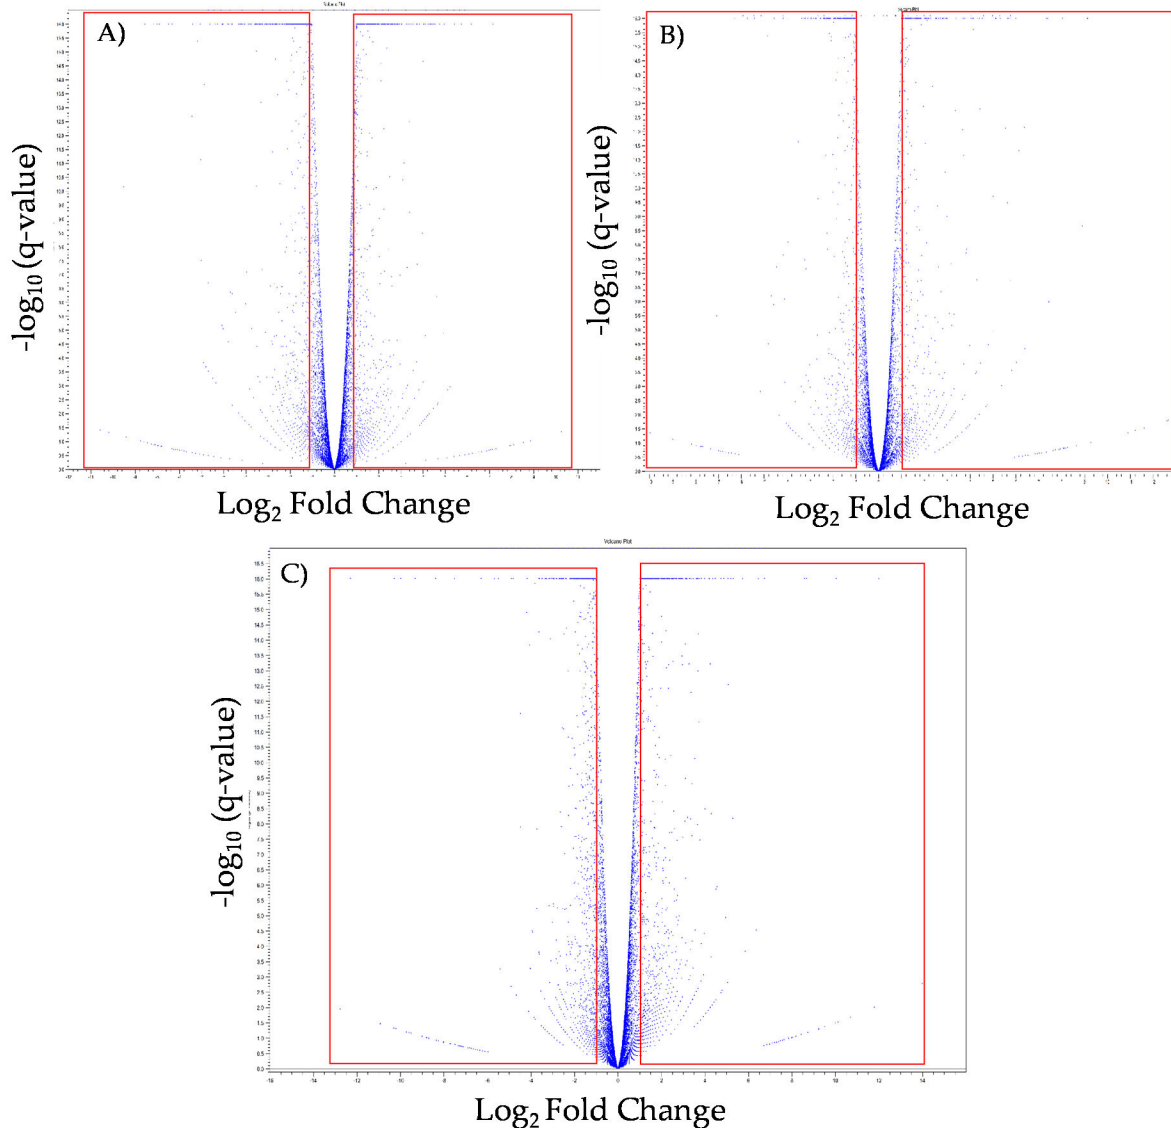

**Figure S3.** Volcano plot of  $-\log_{10}(\text{p-value})$  vs  $\text{Log}_2$  fold change.  $-\log_{10}(\text{p-value})$  represents the significance level and  $\text{Log}_2$  represents the fold change of each gene compared to the normal liver sample. The red outlines encompass all genes with a  $\text{Log}_2$  fold change of  $\leq -1$  and  $\geq 1$  and a p-value of  $\leq 0.05$ . A) Diabetic Liver vs Normal Liver, B) AAV-transduced Liver vs Normal Liver, C) *piggyBac*-transduced liver vs Normal Liver.
