# Supplementary figures and images for: Transcriptomic Analysis of Insulin-Secreting Murine Hepatocytes Transduced with an Integrating Adeno-Associated Viral Vector
Source: MDPI journal article supplement (doi:10.3390/ijtm3030026), 2023-09-06

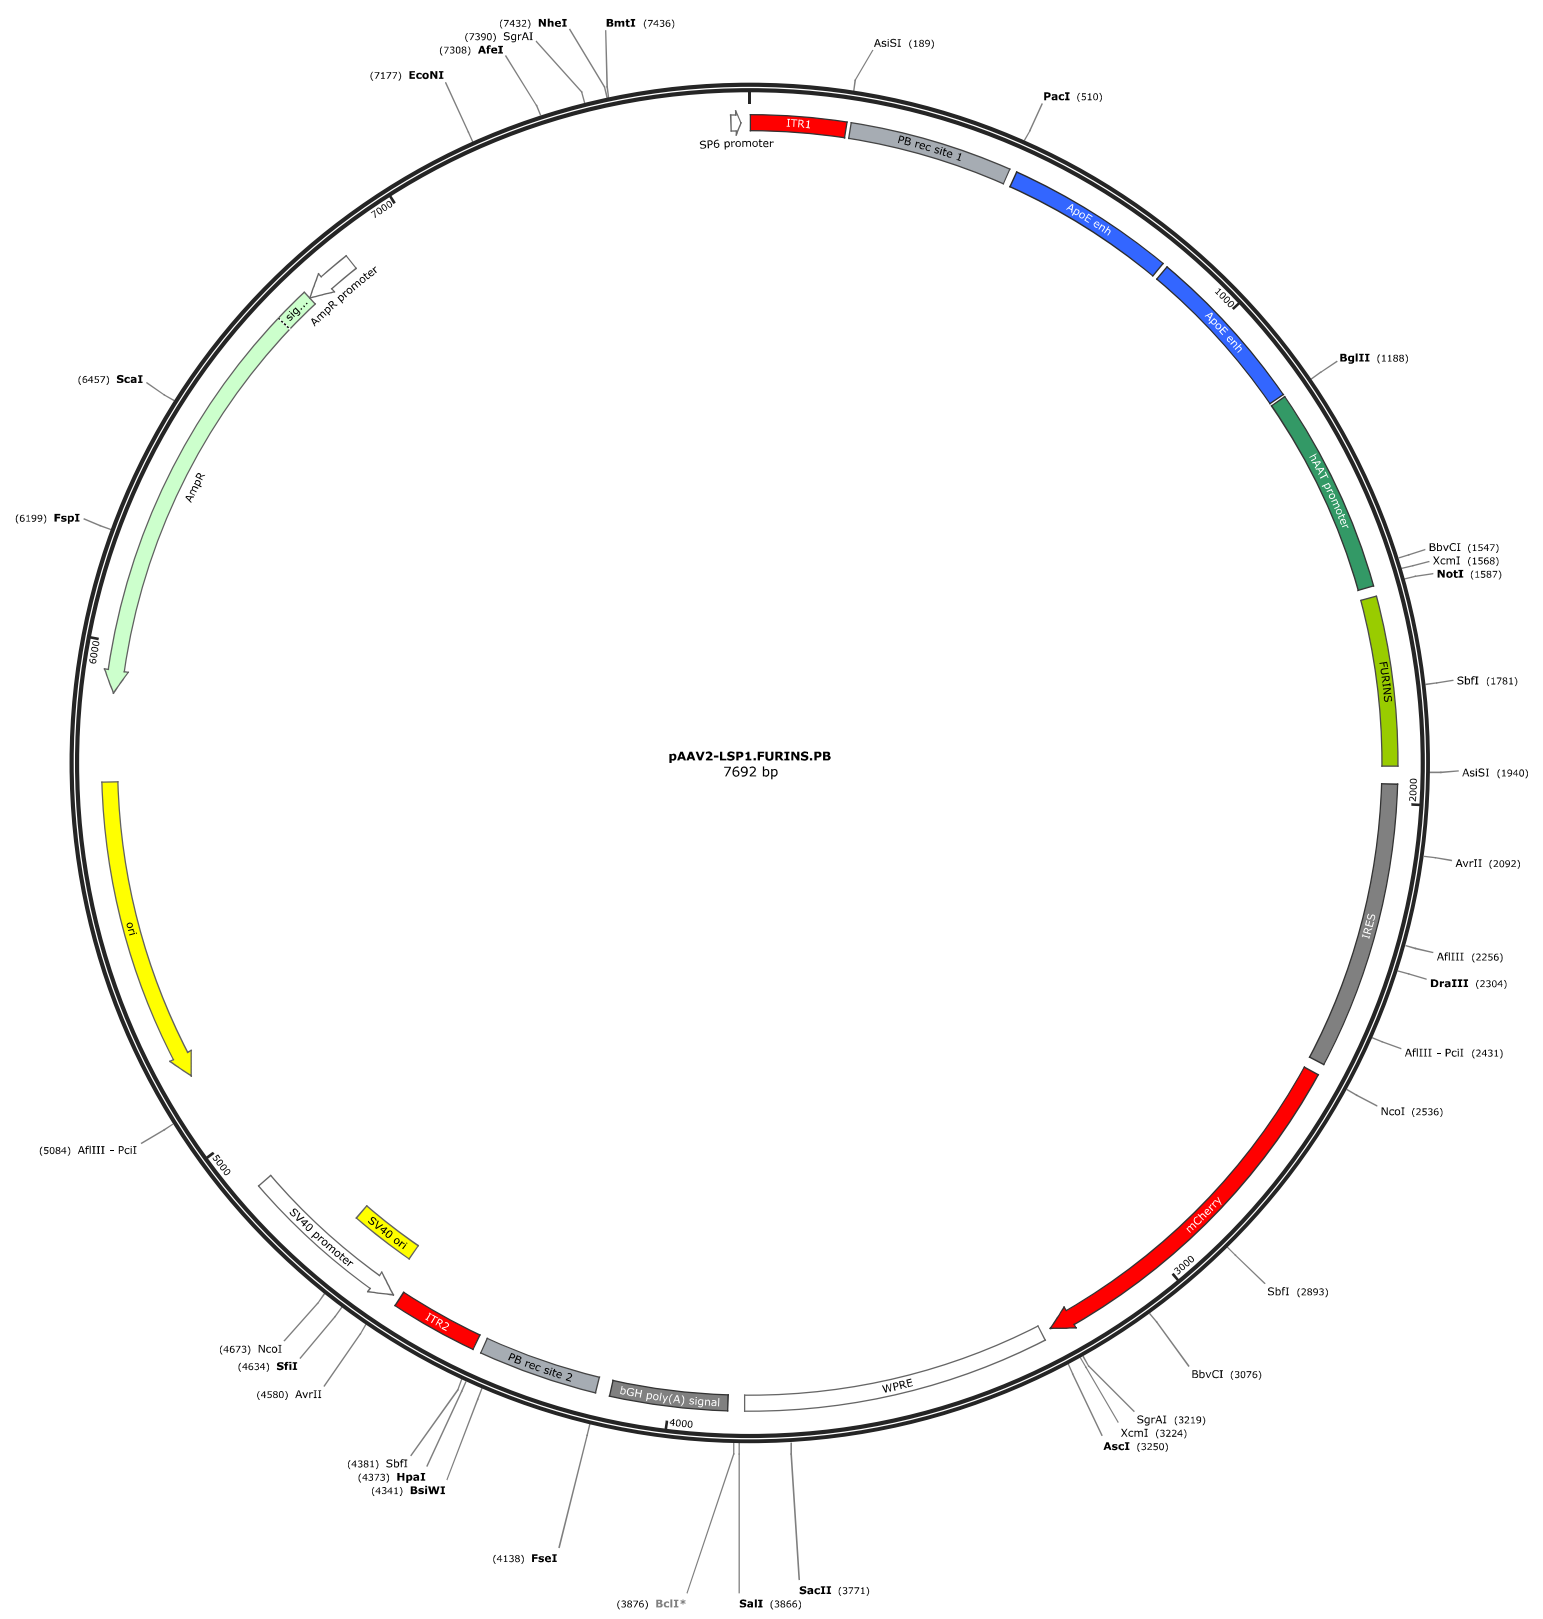

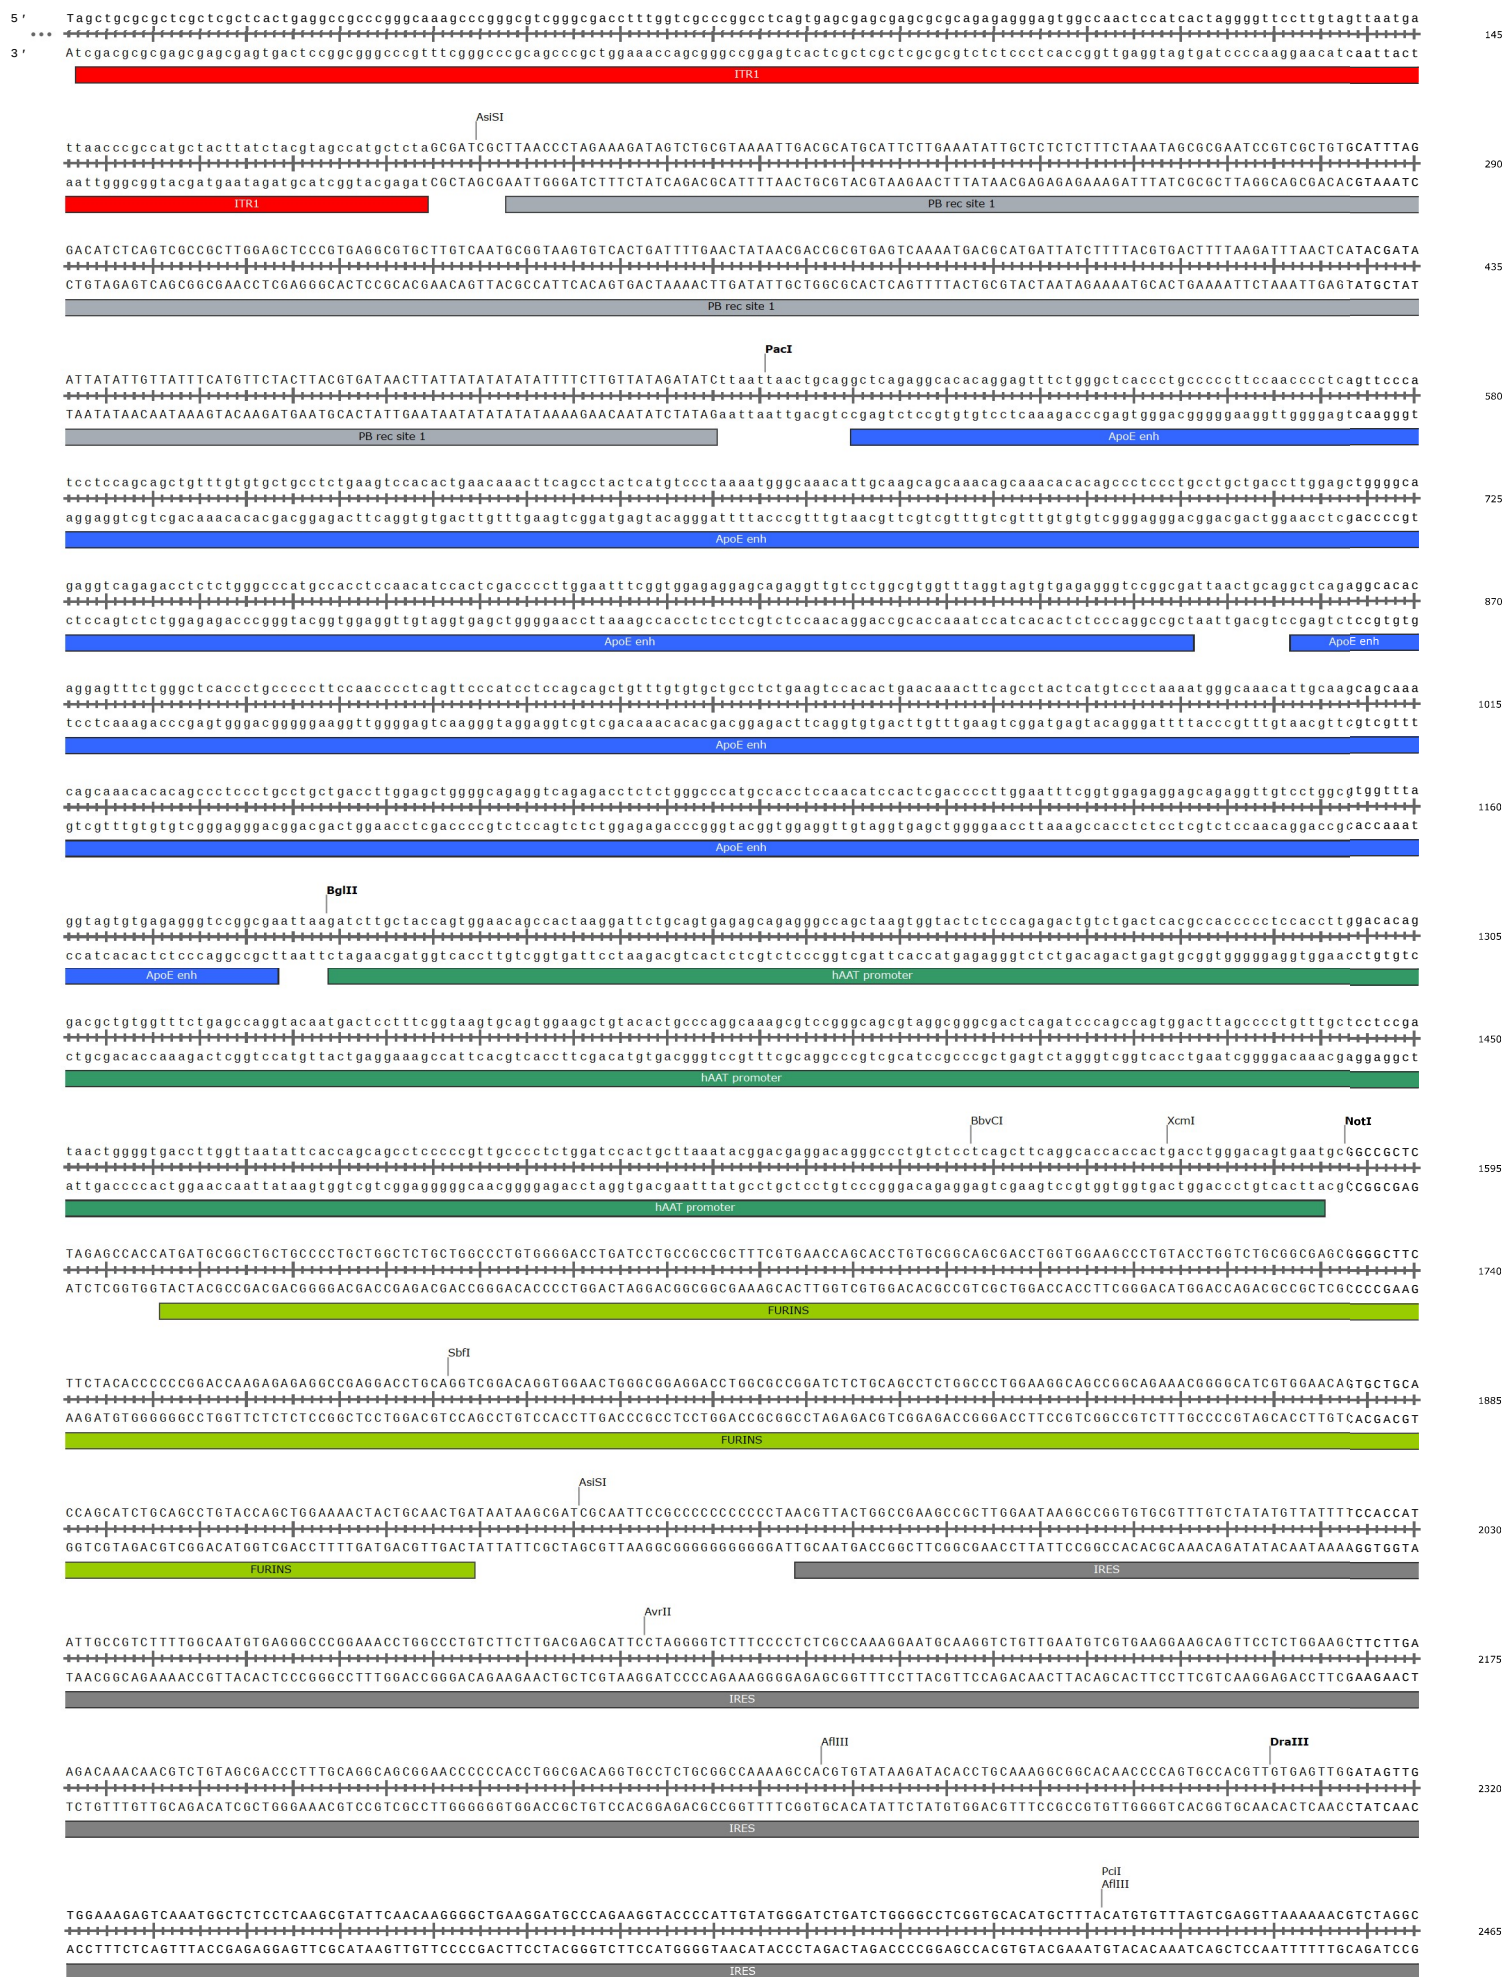

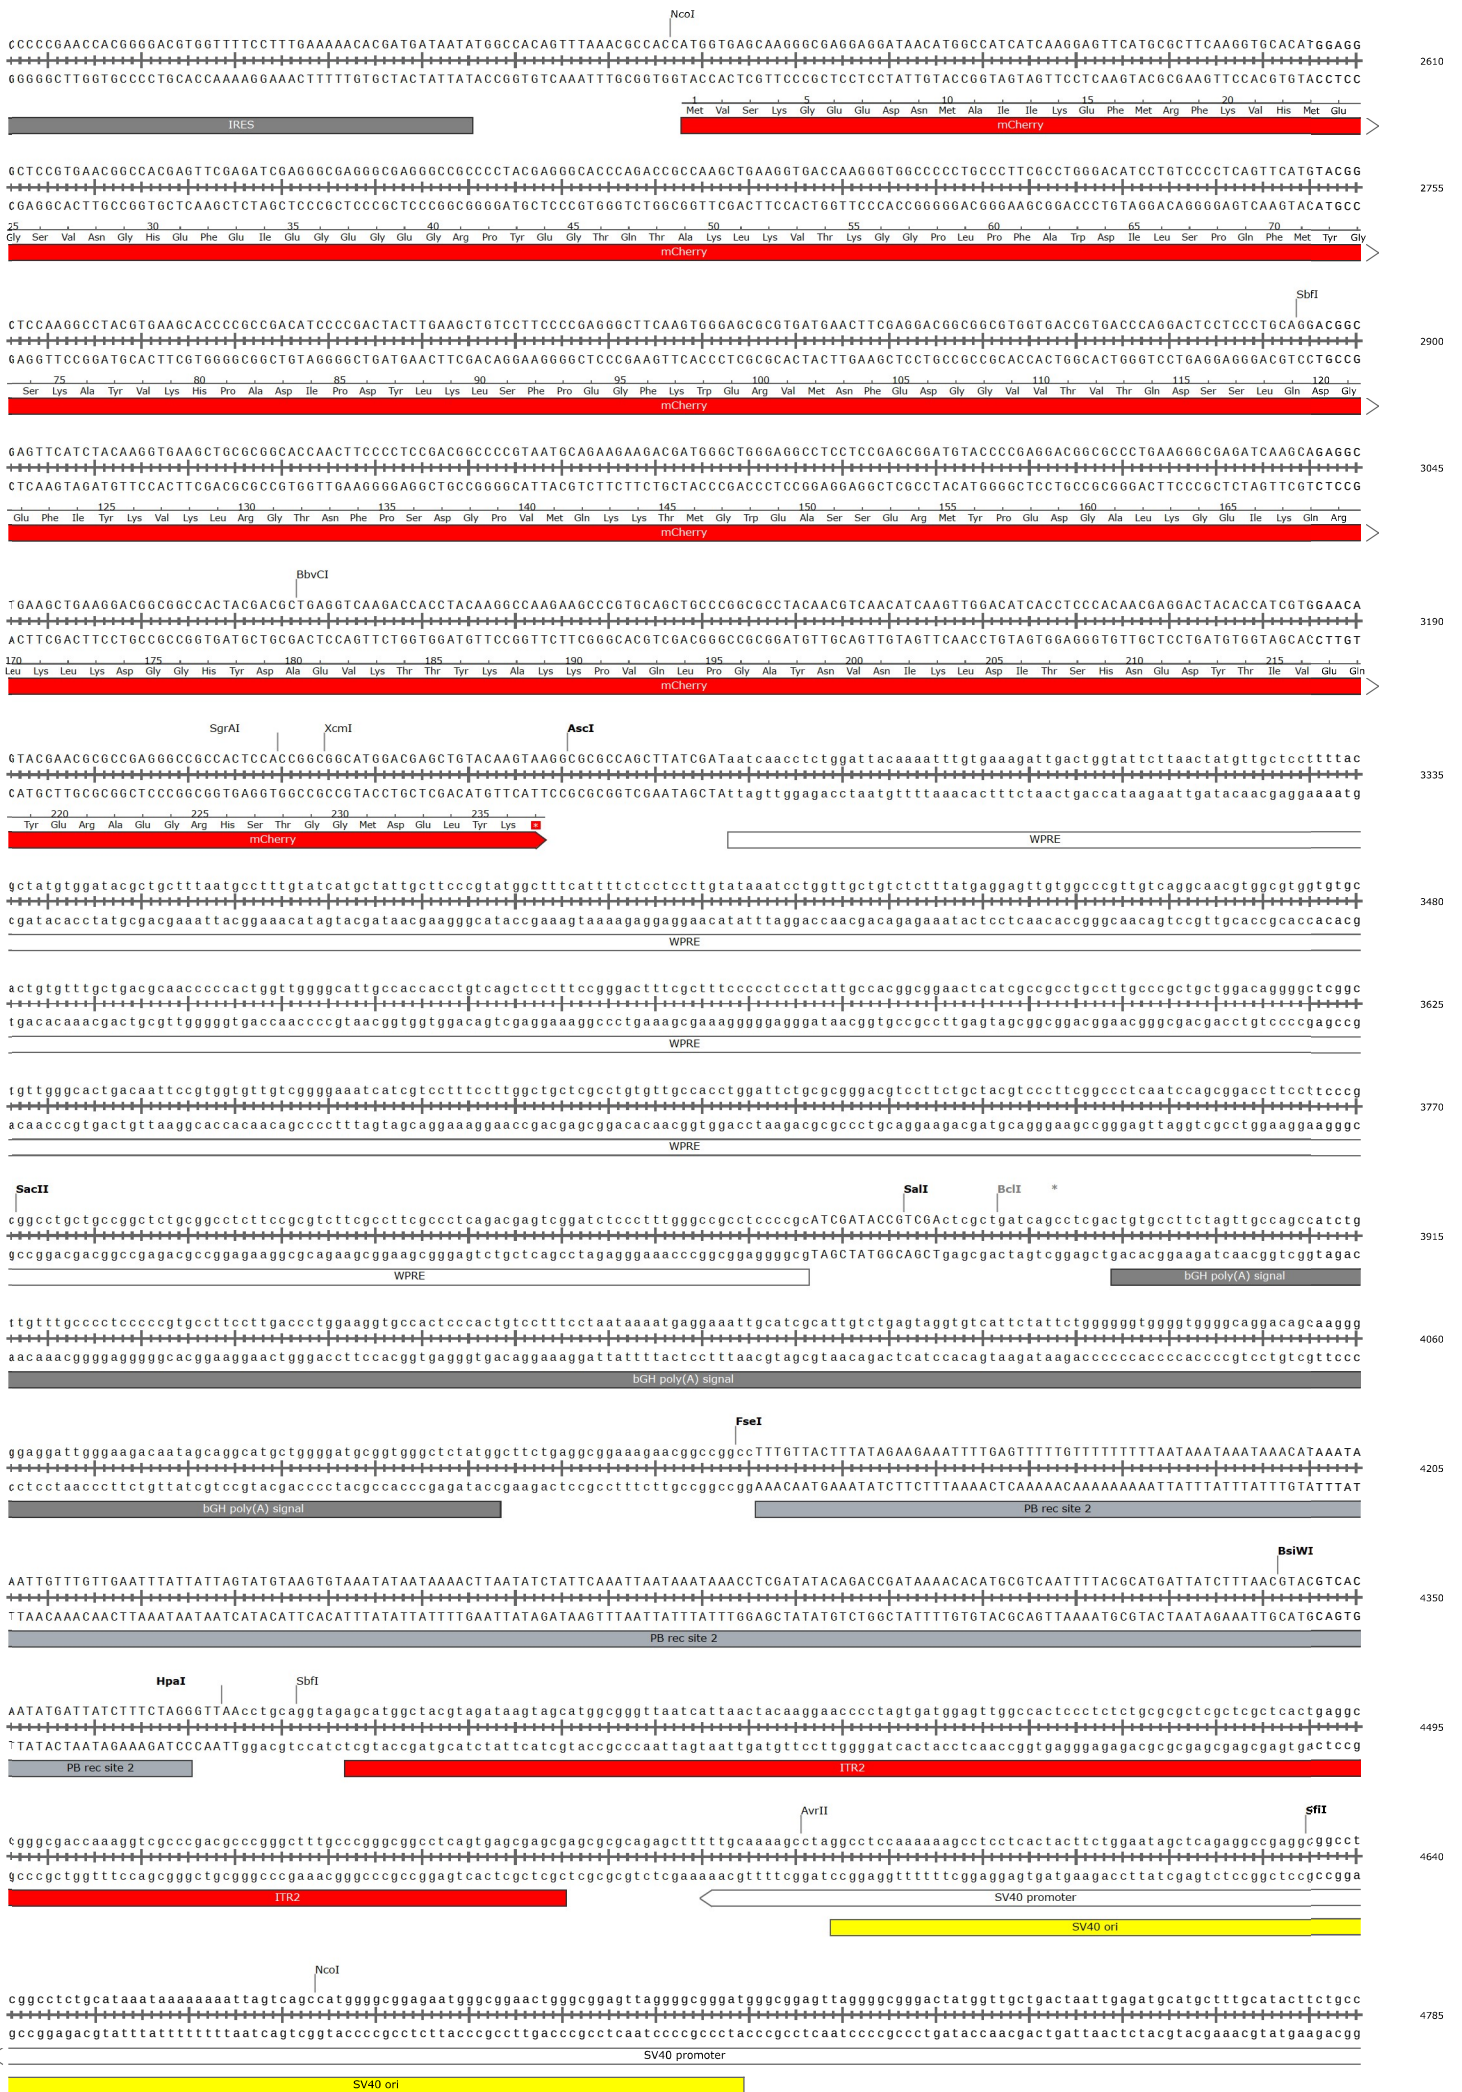



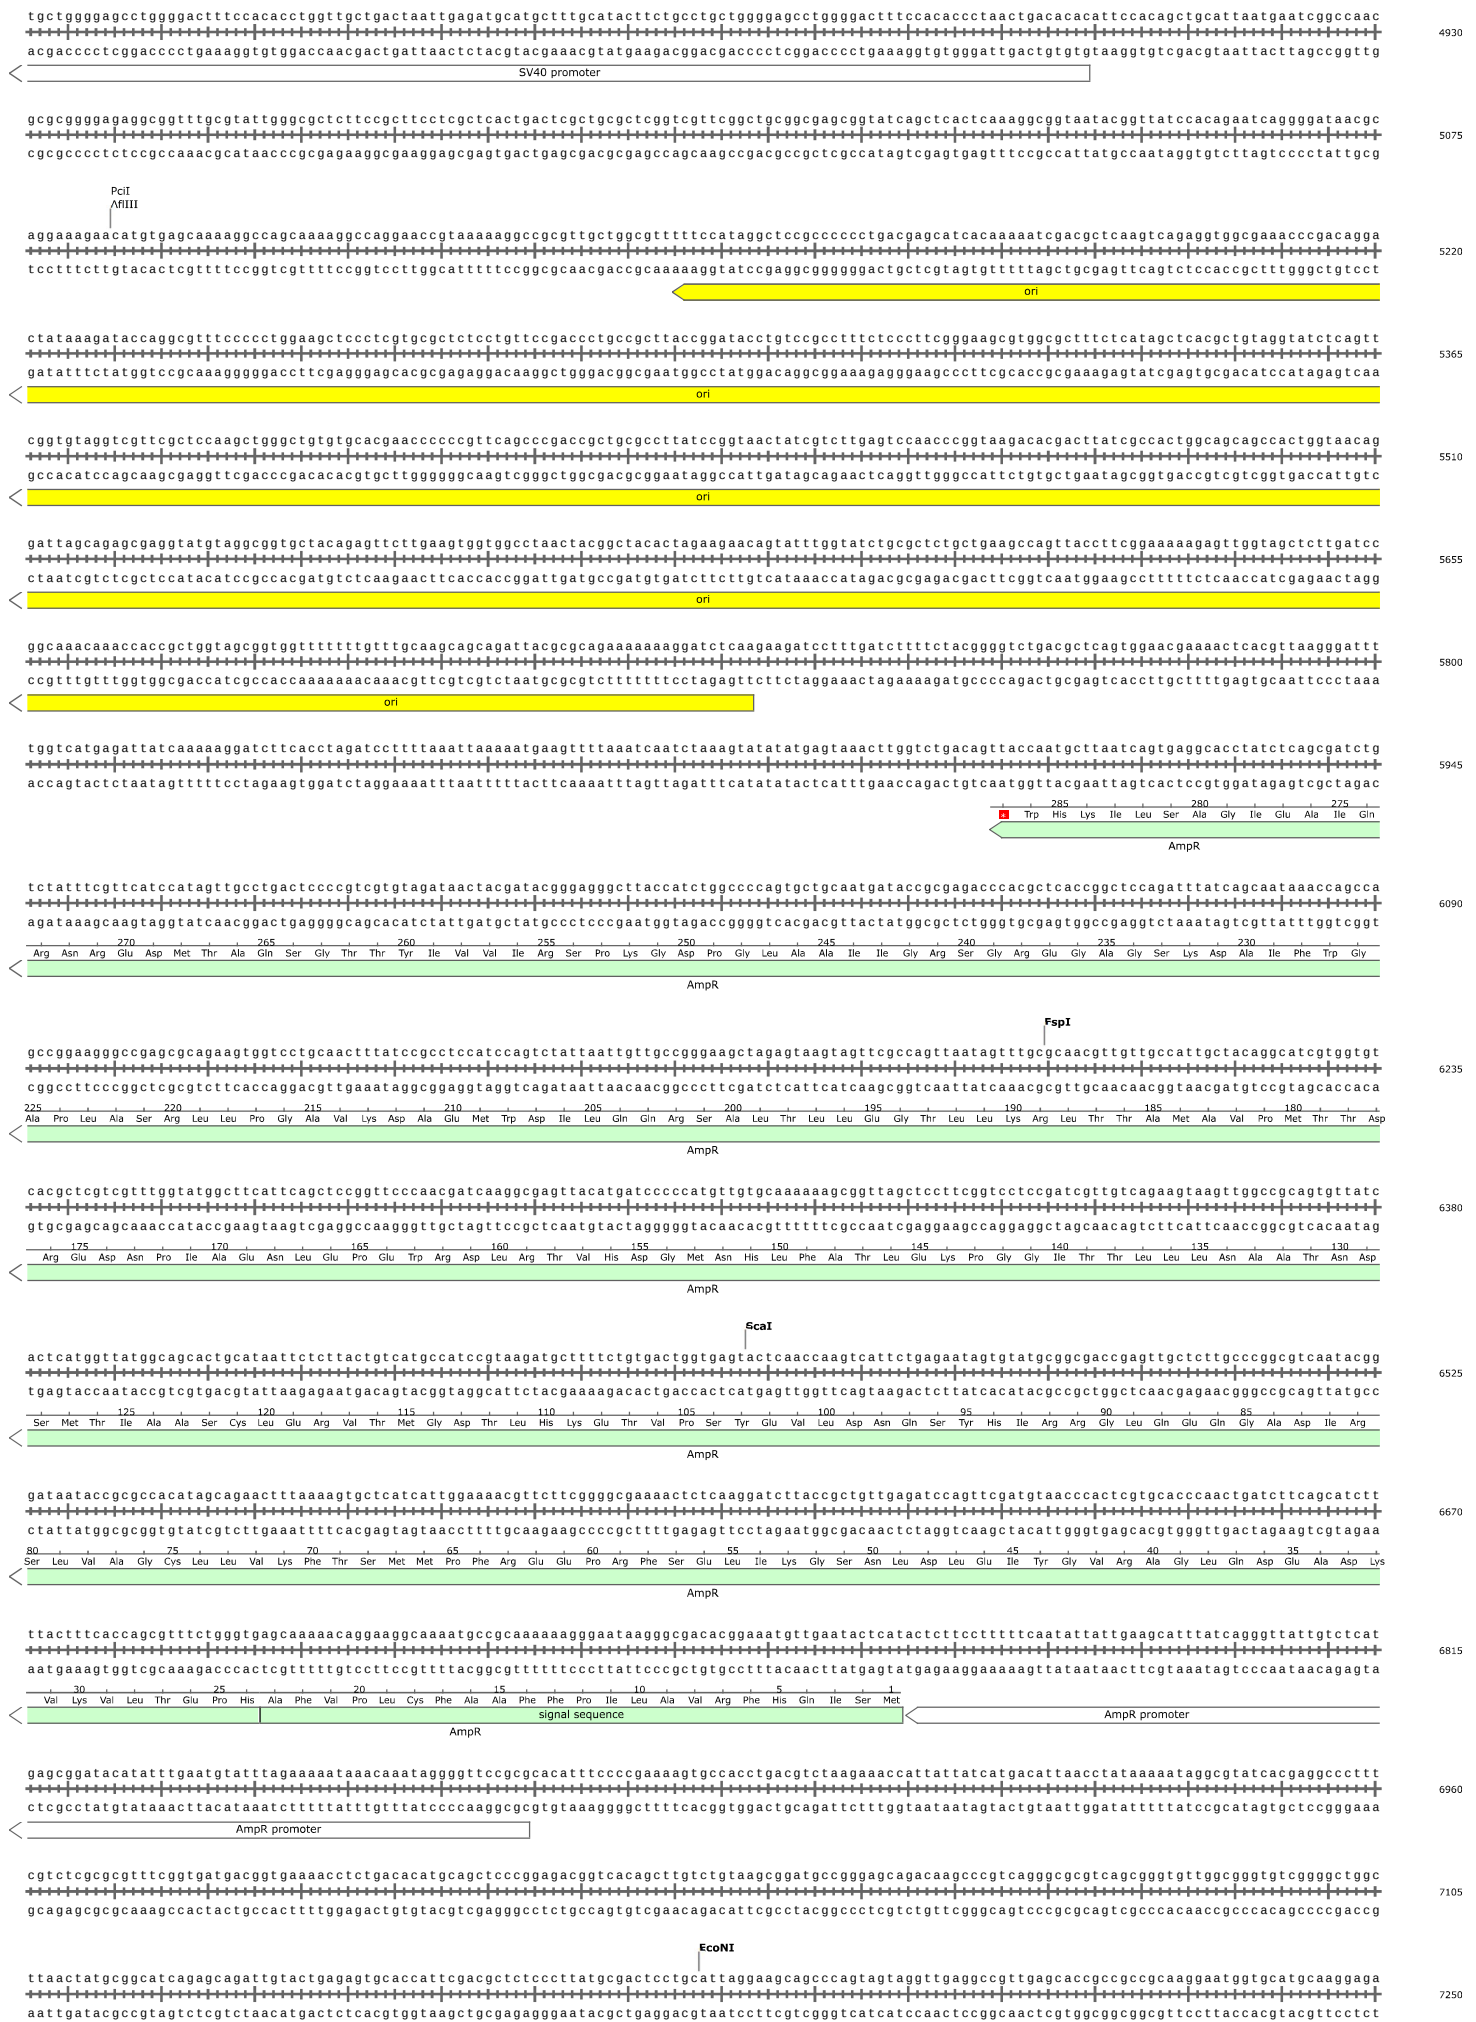

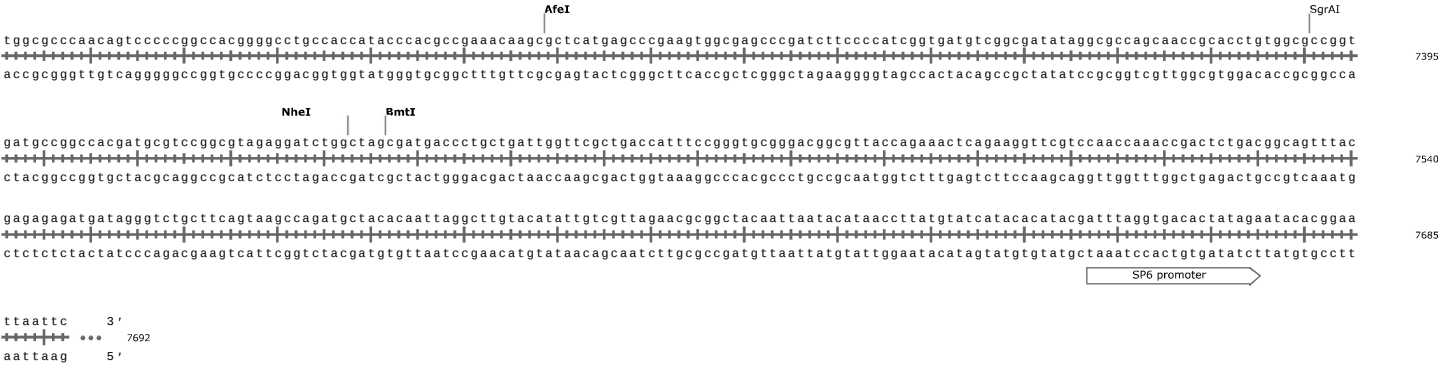

Supplement: s1 [file s1]

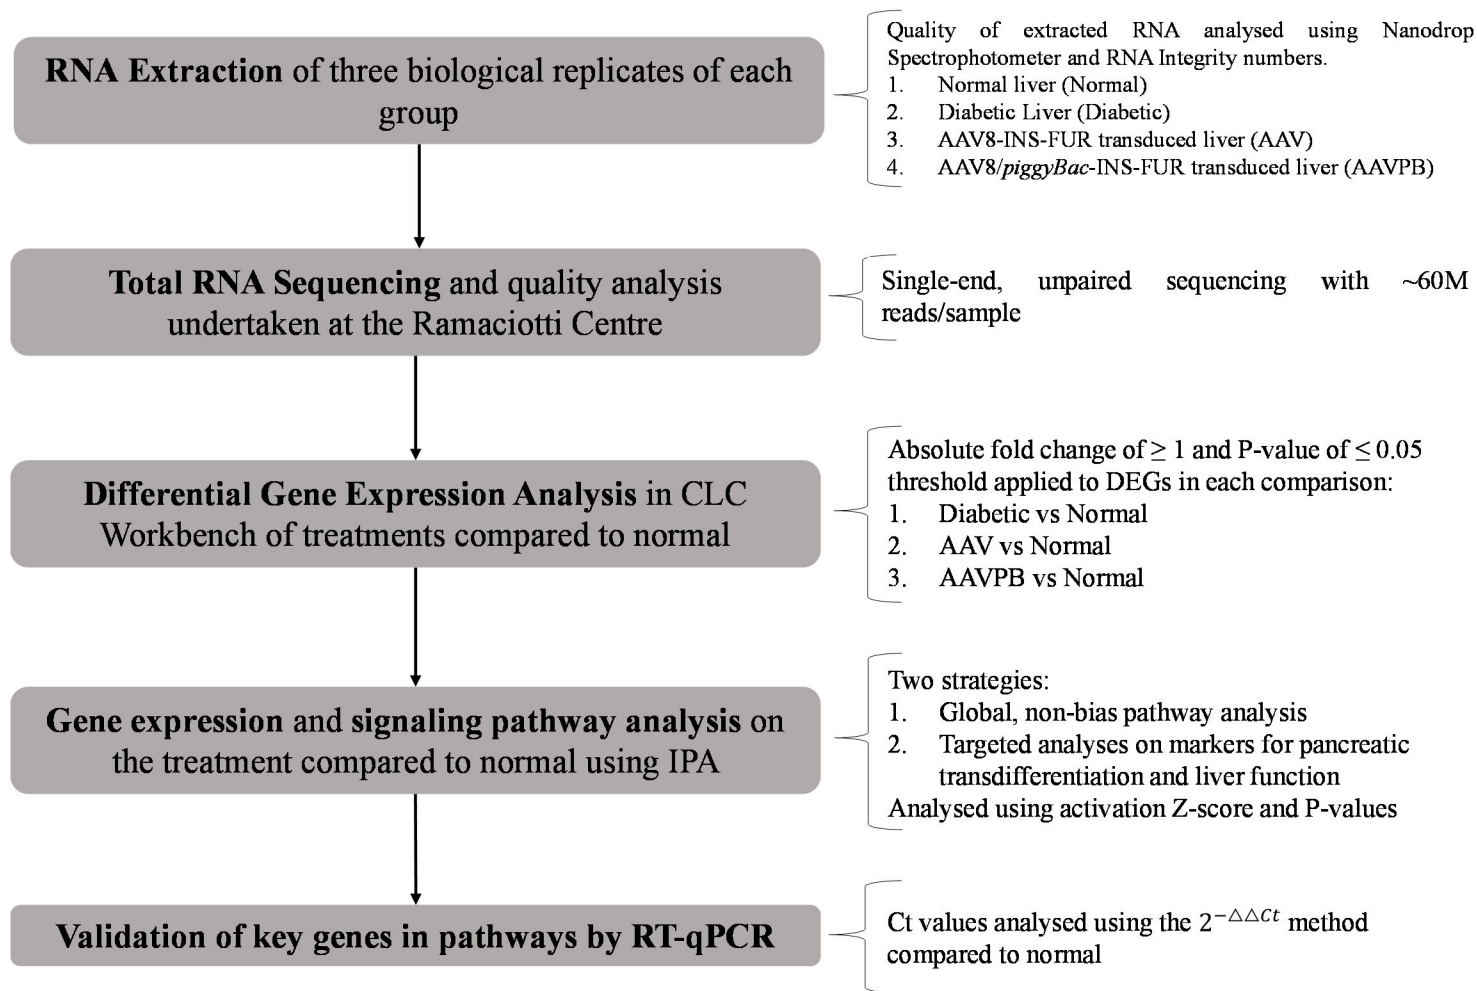

**Figure S1:** Flow chart outlining methodology used to analyse and validate RNA-Seq data.

Supplement: s1 [file s1 › Figure S1.pdf]

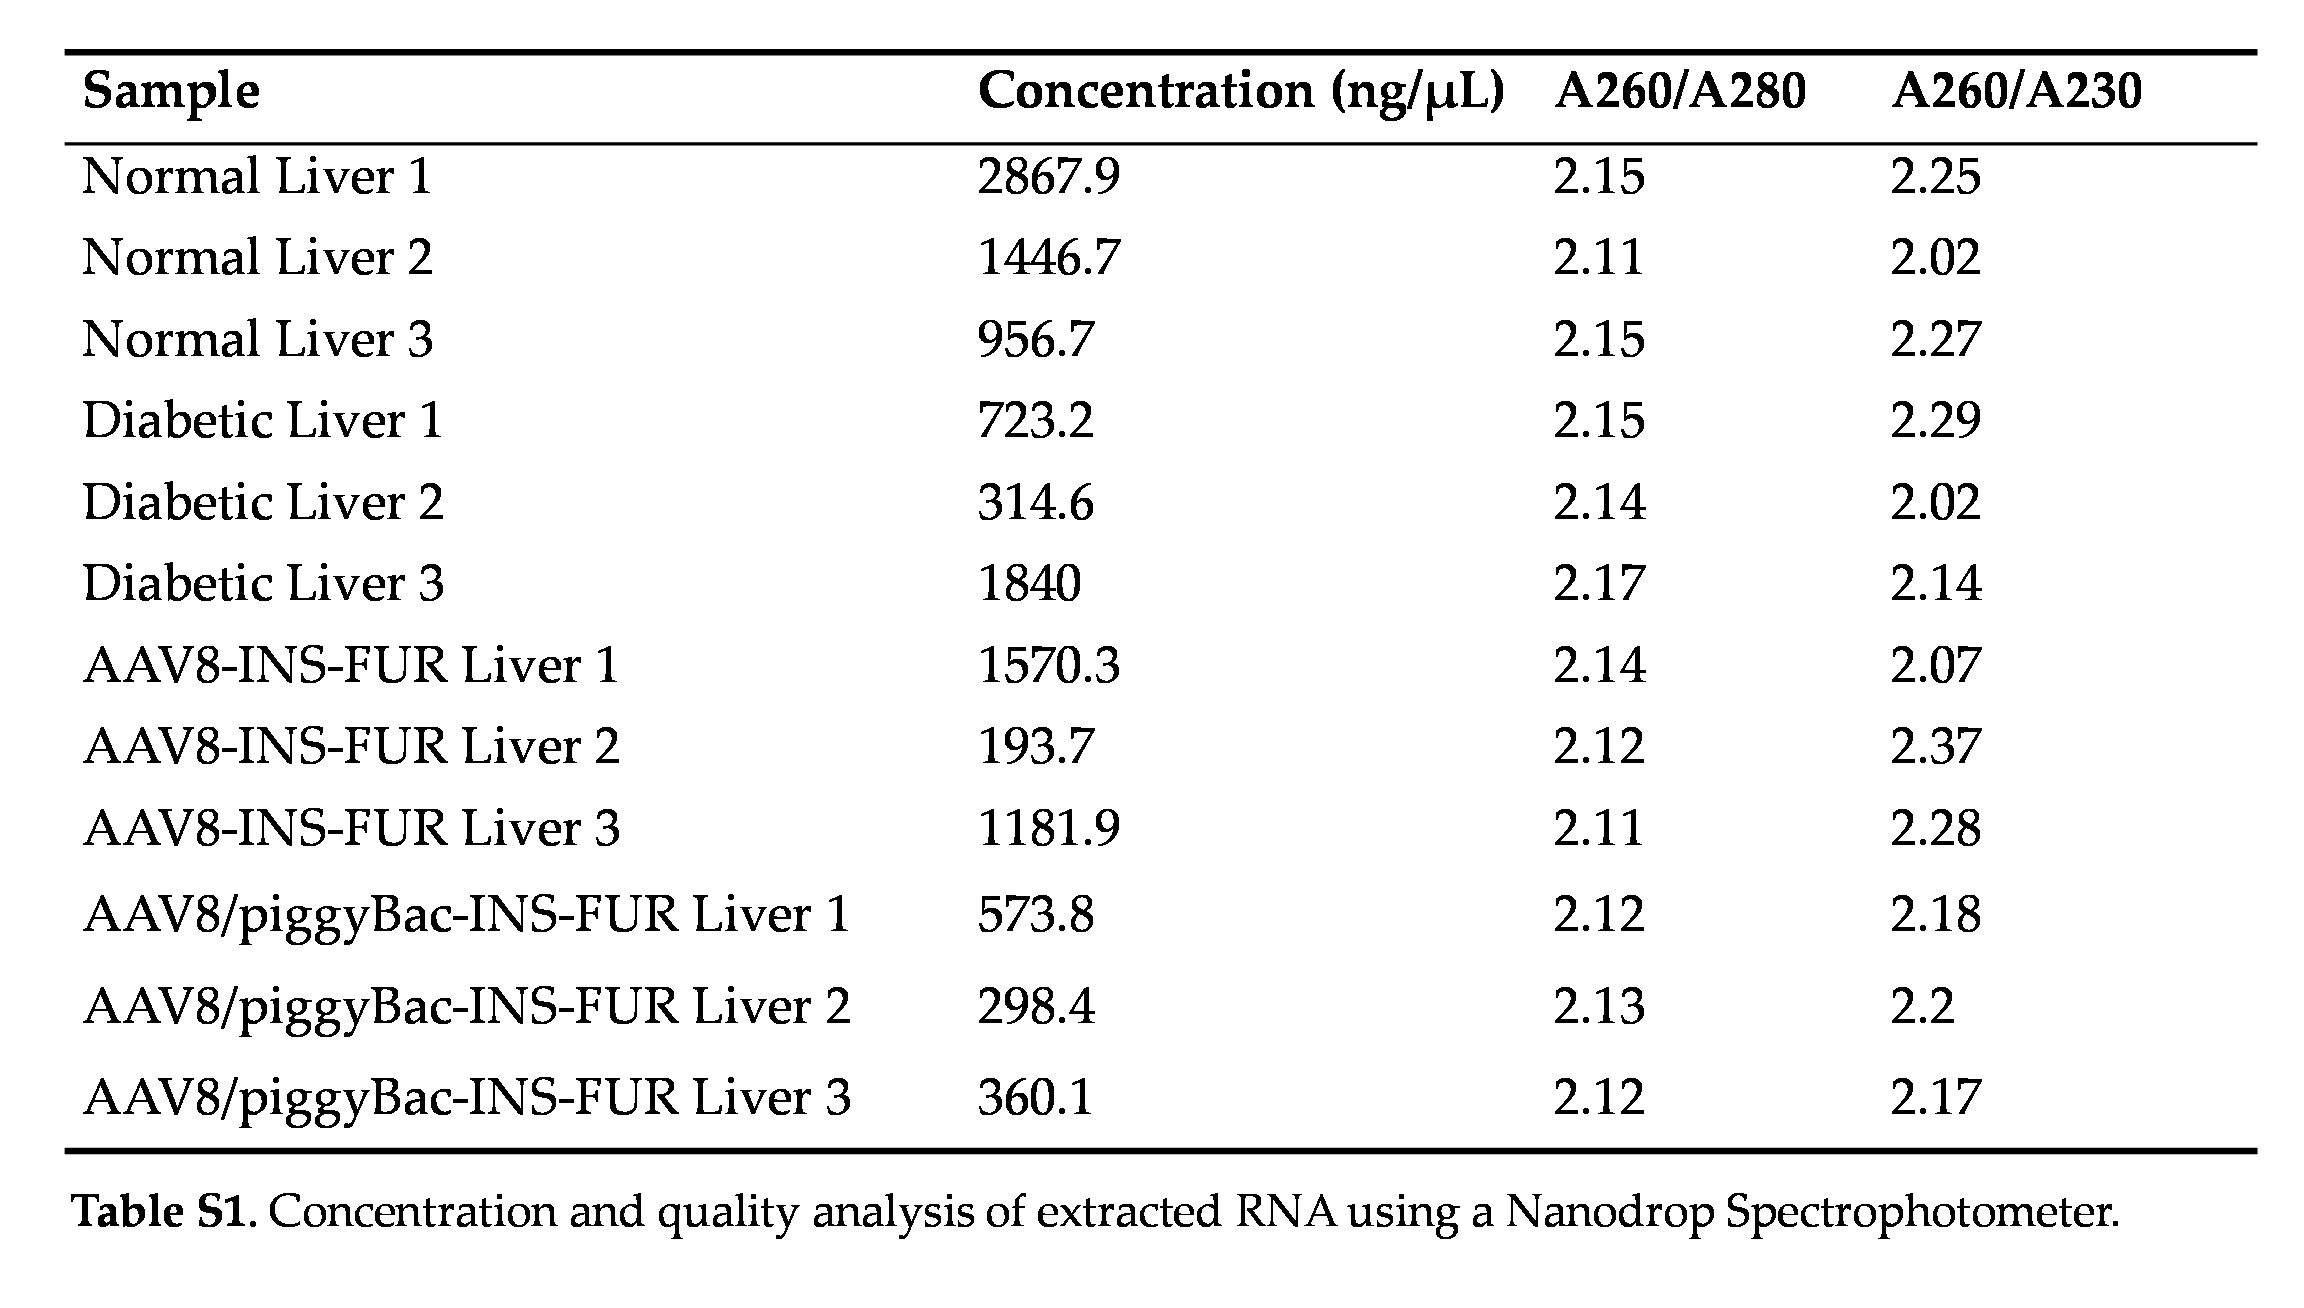

Supplement: s1 [file s1 › Table S1.tif]
